# Supplementary material for: CRISPR Screen Reveals PACT as a Pro-Viral Factor for Dengue Viral Replication
Source: MDPI journal article supplement (doi:10.3390/v16050725), 2024-05-03
Supplement: s1 [file s1]

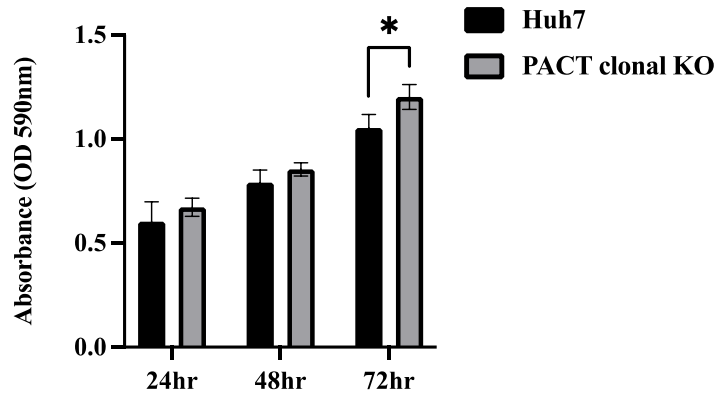

**Figure S1. Effect of PACT knockout on cell viability.** Absorbance at 590nm is plot for MTT assays performed with WT and PACT knockout Huh7 cells at the indicated time points.

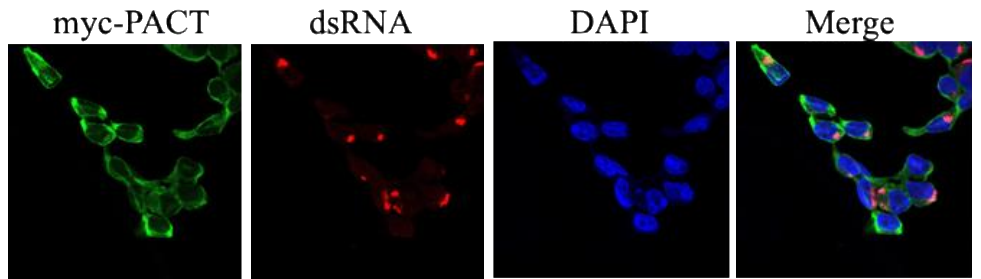

**Figure S2. Interaction of PACT with viral RNA.** Immunostaining of HEK293/FH-PACT/myc-PACT cells infected with DENV2-16681 at a MOI of 1 using J2 and anti-myc antibodies.
