# Supplementary material for: CRISPR Screen Reveals PACT as a Pro-Viral Factor for Dengue Viral Replication
Source: Viruses. 2024 May 3;16(5):725. doi: 10.3390/v16050725 (PMC11125577; doi:10.3390/v16050725)
Supplement: Supplementary file 1 [file viruses-16-00725-s001.zip › viruses-2938353-supplementary revised.xlsx]

## Sheet: DENV5+_DENV5-_CRISPR.gene_summa
id	num	neg|score	neg|p-value	neg|fdr	neg|rank	neg|goodsgrna	neg|lfc	pos|score	pos|p-value	pos|fdr	pos|rank	pos|goodsgrna	pos|lfc
OSTC	6	1	1	0.999997	1544	0	4.3361	7.38e-12	3.21e-06	0.00033	1	6	4.3361
STT3A	6	0.96708	0.96754	0.999997	1405	0	4.7187	6.11e-10	3.21e-06	0.00033	2	5	4.7187
SSR3	6	1	1	0.999997	1543	0	3.1103	6.18e-10	3.21e-06	0.00033	3	6	3.1103
PGK1	6	1	1	0.999997	1542	0	2.6551	1.46e-09	3.21e-06	0.00033	4	6	2.6551
ASCC2	6	1	1	0.999997	1541	0	2.0134	2.56e-09	3.21e-06	0.00033	5	6	2.0134
STT3B	6	0.98093	0.98126	0.999997	1441	0	3.6455	7e-09	3.21e-06	0.00033	6	5	3.6455
HDLBP	6	1	1	0.999997	1540	0	2.4542	8.47e-09	3.21e-06	0.00033	7	6	2.4542
PGAM1	6	1	1	0.999997	1539	0	2.8263	8.61e-09	3.21e-06	0.00033	8	6	2.8263
RPN2	6	1	1	0.999997	1536	0	3.5537	1.44e-08	3.21e-06	0.00033	9	6	3.5537
DDX6	6	1	1	0.999997	1538	0	2.1516	1.08e-07	3.21e-06	0.00033	10	6	2.1516
PRKRA	6	1	1	0.999997	1537	0	1.7315	1.09e-07	3.21e-06	0.00033	11	6	1.7315
RPS25	6	1	1	0.999997	1534	0	2.8642	2.97e-07	3.21e-06	0.00033	12	6	2.8642
DDX1	6	1	1	0.999997	1535	0	1.9669	4.86e-07	3.21e-06	0.00033	13	6	1.9669
RNH1	6	0.99996	0.99997	0.999997	1527	0	2.1595	1.22e-06	3.21e-06	0.00033	14	6	2.1595
LIN28B	6	0.99999	1	0.999997	1530	0	1.9317	1.27e-06	3.21e-06	0.00033	15	6	1.9317
TPI1	6	1	1	0.999997	1533	0	1.6982	1.51e-06	9.62e-06	0.000928	16	6	1.6982
VARS1	6	0.11573	0.22662	0.938086	334	1	3.6712	1.97e-06	1.6e-05	0.001375	17	4	3.6712
SSR4	6	1	1	0.999997	1532	0	1.0877	2.95e-06	1.6e-05	0.001375	18	6	1.0877
RRBP1	6	1	1	0.999997	1531	0	1.2797	4.38e-06	2.24e-05	0.001824	19	6	1.2797
TPT1	6	0.80054	0.80033	0.999997	1142	0	2.7074	6.35e-06	4.81e-05	0.003229	20	5	2.7074
KARS1	6	0.206	0.32441	0.999997	447	2	2.8424	7.09e-06	4.81e-05	0.003229	21	4	2.8424
EEF1A1	6	0.99998	1	0.999997	1528	0	2.1708	8e-06	4.81e-05	0.003229	22	6	2.1708
TRIM71	6	0.99999	1	0.999997	1529	0	1.5226	8.51e-06	4.81e-05	0.003229	23	6	1.5226
DAD1	6	0.99996	0.99997	0.999997	1526	0	2.643	9.88e-06	5.45e-05	0.003507	24	6	2.643
RACK1	6	0.9999	0.99994	0.999997	1521	0	2.5257	1.63e-05	8.02e-05	0.00495	25	6	2.5257
RTCB	6	0.99959	0.99957	0.999997	1515	0	2.4489	1.65e-05	8.66e-05	0.005141	26	5	2.4489
DERL2	6	0.93286	0.9331	0.999997	1345	0	2.403	1.7e-05	9.3e-05	0.005317	27	4	2.403
DDOST	6	0.9812	0.98154	0.999997	1443	0	2.2412	2.71e-05	0.00015711	0.008365	28	5	2.2412
RPN1	6	0.99671	0.99673	0.999997	1499	0	2.0532	2.73e-05	0.00015711	0.008365	29	5	2.0532
RPS15	6	0.054996	0.12815	0.794843	219	1	2.2763	2.86e-05	0.00016352	0.008416	30	4	2.2763
RPS23	6	0.97789	0.97819	0.999997	1429	0	2.2775	3.4e-05	0.00018917	0.009422	31	5	2.2775
SEC61B	6	0.99984	0.99986	0.999997	1519	0	1.9592	3.7e-05	0.00019558	0.009437	32	6	1.9592
DHX36	6	0.86235	0.86278	0.999997	1236	0	1.59	4.22e-05	0.00021482	0.010051	33	5	1.59
PCBP2	6	0.99995	0.99997	0.999997	1525	0	0.94795	5.1e-05	0.0002533	0.011457	34	6	0.94795
H3C15	6	0.99982	0.99982	0.999997	1518	0	1.3226	5.43e-05	0.00025971	0.011457	35	6	1.3226
EEF2	6	0.99994	0.99996	0.999997	1524	0	1.9738	5.78e-05	0.00027895	0.011908	36	6	1.9738
ALDOA	6	0.99994	0.99996	0.999997	1523	0	1.1917	5.87e-05	0.00028536	0.011908	37	6	1.1917
ENO1	6	0.99991	0.99995	0.999997	1522	0	0.9585	9.39e-05	0.00047132	0.018441	38	6	0.9585
UHRF1	6	0.99623	0.9964	0.999997	1496	0	1.1449	9.46e-05	0.00047774	0.018441	39	5	1.1449
PPP4C	6	0.99825	0.99823	0.999997	1505	0	2.0232	9.51e-05	0.00047774	0.018441	40	5	2.0232
SRSF1	6	0.26841	0.39347	0.999997	529	1	2.1634	0.00011009	0.0005611	0.02113	41	5	2.1634
MRPL38	6	0.99986	0.99987	0.999997	1520	0	1.16	0.00013937	0.00067652	0.024292	42	6	1.16
RPL21	4	0.58015	0.58066	0.999997	862	1	2.6551	0.00015242	0.00063805	0.023456	43	2	2.6551
RPS14	6	0.99953	0.99952	0.999997	1514	0	1.2752	0.0001792	0.00088814	0.031166	44	5	1.2752
PCNA	6	0.9483	0.9487	0.999997	1374	0	1.9148	0.00018639	0.0009202	0.031533	45	4	1.9148
SLC25A3	6	0.95628	0.95653	0.999997	1387	0	2.0939	0.00019273	0.00093944	0.031533	46	5	2.0939
EIF5A	6	0.68511	0.68806	0.999997	967	1	1.8675	0.00023911	0.0012024	0.038882	47	4	1.8675
SF3B2	6	0.098432	0.20714	0.928246	299	1	1.6554	0.00024262	0.0012088	0.038882	48	4	1.6554
RPL10	6	0.98944	0.98981	0.999997	1469	0	1.8995	0.00029589	0.0014076	0.044059	49	5	1.8995
PRDX1	6	0.92385	0.92425	0.999997	1328	0	1.5834	0.0003	0.0014268	0.044059	50	4	1.5834
PRPS1	6	0.99915	0.99916	0.999997	1511	0	1.4707	0.00040911	0.0018051	0.05465	51	5	1.4707
RPS11	6	0.034942	0.089676	0.717411	168	1	1.4596	0.00041957	0.0018693	0.055503	52	4	1.4596
SBDS	6	0.99389	0.9943	0.999997	1485	0	1.808	0.00047196	0.0021194	0.061741	53	5	1.808
RRM1	5	0.036028	0.086252	0.717411	172	2	2.2897	0.00053606	0.0024592	0.070315	54	3	2.2897
ATP5F1A	6	0.11309	0.22372	0.938086	330	1	1.5273	0.00058861	0.0025362	0.071197	55	3	1.5273
DNLZ	6	0.94655	0.94707	0.999997	1369	0	1.2736	0.00063178	0.0027414	0.075583	56	5	1.2736
RPS3	6	0.99251	0.9929	0.999997	1478	0	1.8577	0.00071471	0.0031261	0.08468	57	5	1.8577
YARS1	6	0.57495	0.60613	0.999997	860	1	1.4769	0.00074795	0.0031838	0.084756	58	4	1.4769
UBE2M	6	0.58277	0.61154	0.999997	866	1	1.5148	0.00078741	0.0033506	0.086551	59	4	1.5148
RARS1	6	0.94693	0.94745	0.999997	1371	0	1.4564	0.0007916	0.0033634	0.086551	60	4	1.4564
LSM12	6	0.89008	0.8908	0.999997	1278	0	1.2086	0.0008368	0.0035045	0.088703	61	5	1.2086
IARS1	6	0.99967	0.99964	0.999997	1516	0	1.5775	0.00089482	0.003793	0.094459	62	5	1.5775
RPS12	6	0.32298	0.45312	0.999997	622	1	0.57665	0.00093552	0.0039662	0.097203	63	3	0.57665
RPL34	6	0.99148	0.99183	0.999997	1477	0	1.4289	0.0010176	0.0042868	0.103419	64	4	1.4289
MDN1	6	0.88378	0.88418	0.999997	1266	0	1.3441	0.001043	0.0044279	0.103885	65	4	1.3441
NF2	6	0.98191	0.98225	0.999997	1446	0	0.99305	0.0010497	0.0044407	0.103885	66	5	0.99305
SNRPB	6	0.012004	0.038337	0.529503	106	2	1.2748	0.0011772	0.0050499	0.116374	67	4	1.2748
CTBP1	6	0.99872	0.99875	0.999997	1508	0	0.99423	0.0014225	0.0060374	0.137085	68	5	0.99423
EIF6	6	0.99809	0.99809	0.999997	1503	0	1.3121	0.0016536	0.0070057	0.150825	69	5	1.3121
GMPS	6	0.99654	0.99661	0.999997	1497	0	1.0512	0.0016777	0.0070634	0.150825	70	5	1.0512
COX5A	6	0.9951	0.99537	0.999997	1491	0	1.139	0.0016874	0.0070698	0.150825	71	5	1.139
RPL8	6	0.78213	0.78201	0.999997	1111	0	1.3205	0.0016951	0.0071019	0.150825	72	4	1.3205
GEMIN5	6	0.99967	0.99964	0.999997	1517	0	1.2172	0.0017353	0.0072622	0.150825	73	5	1.2172
CAD	6	0.98457	0.98498	0.999997	1451	0	1.3524	0.0017518	0.0073263	0.150825	74	5	1.3524
FTSJ2	4	0.98954	0.98997	0.999997	1470	0	1.4339	0.0018996	0.0072109	0.150825	75	3	1.4339
RPL3	6	0.59703	0.62139	0.999997	884	1	0.95174	0.0019909	0.008269	0.167991	76	3	0.95174
GARS1	6	0.98802	0.98838	0.999997	1463	0	1.1818	0.0020512	0.0084934	0.168126	77	4	1.1818
RPA1	6	0.045892	0.11098	0.762656	196	1	0.84208	0.0020512	0.0084934	0.168126	78	5	0.84208
PPP1CA	6	0.9979	0.99791	0.999997	1500	0	0.88374	0.0020855	0.008673	0.169507	79	5	0.88374
GCN1	6	0.86137	0.86184	0.999997	1232	0	0.83716	0.0022091	0.0091219	0.172965	80	5	0.83716
PGD	6	0.99587	0.99604	0.999997	1493	0	1.2633	0.0022173	0.0091603	0.172965	81	5	1.2633
IPO9	6	0.83513	0.8353	0.999997	1192	0	1.0879	0.0022238	0.009186	0.172965	82	4	1.0879
TKT	6	0.99792	0.99794	0.999997	1501	0	1.0917	0.0023321	0.0096092	0.178755	83	5	1.0917
SF3B4	6	0.99911	0.99913	0.999997	1510	0	0.74665	0.0024149	0.0099298	0.181771	84	5	0.74665
ZNF787	6	0.99813	0.99811	0.999997	1504	0	0.69906	0.0024408	0.010007	0.181771	85	5	0.69906
RBM15	6	0.99945	0.99943	0.999997	1513	0	0.68795	0.0025265	0.010295	0.184838	86	5	0.68795
RPL13A	5	0.1019	0.18577	0.905301	307	1	1.4606	0.0028543	0.010738	0.190566	87	3	1.4606
TXNRD1	6	0.33971	0.47167	0.999997	654	1	0.90522	0.0031607	0.012668	0.219769	88	4	0.90522
FSCN1	6	0.84466	0.84473	0.999997	1201	0	1.0579	0.0032242	0.01295	0.222167	89	4	1.0579
RPS19	5	0.022641	0.057729	0.598213	145	1	1.533	0.0034012	0.012431	0.218103	90	4	1.533
USP10	6	0.59394	0.6189	0.999997	879	1	0.64828	0.0034418	0.013854	0.235067	91	5	0.64828
TNPO1	6	0.99074	0.99107	0.999997	1474	0	1.1892	0.0036616	0.014816	0.248655	92	4	1.1892
RTRAF	6	0.71613	0.71593	0.999997	1004	1	0.965	0.0037456	0.015182	0.252049	93	3	0.965
PKM	6	0.99408	0.99446	0.999997	1486	0	1.1152	0.0038782	0.01572	0.258216	94	5	1.1152
RPS28	6	0.10645	0.21658	0.937624	313	1	0.94367	0.0042003	0.016996	0.27336	95	4	0.94367
MARS1	6	0.0076738	0.025506	0.43374	90	3	-0.33269	0.004379	0.017586	0.277177	96	2	-0.33269
U2SURP	6	0.020116	0.060025	0.606387	138	2	1.0437	0.0043809	0.017593	0.277177	97	4	1.0437
GRSF1	6	0.99843	0.99842	0.999997	1506	0	0.99677	0.0044802	0.017984	0.280478	98	5	0.99677
EIF4E	5	0.71469	0.71525	0.999997	1003	0	-0.21523	0.0045615	0.015932	0.258937	99	1	-0.21523
RPS8	6	0.014896	0.047014	0.550898	122	2	1.1597	0.0055294	0.021357	0.323287	100	4	1.1597
DDX47	5	0.03514	0.084405	0.717411	169	1	0.33593	0.0057751	0.019927	0.307673	101	2	0.33593
SNRPC	5	0.98841	0.98861	0.999997	1465	0	0.9751	0.0059479	0.020408	0.311979	102	4	0.9751
EIF3D	6	0.96959	0.96979	0.999997	1414	0	1.0147	0.0066024	0.02473	0.369716	103	4	1.0147
GLRX5	6	0.98319	0.98347	0.999997	1449	0	0.96696	0.0066606	0.024903	0.369716	104	4	0.96696
MARS2	6	0.91875	0.91926	0.999997	1319	0	1.0624	0.0068374	0.025493	0.37487	105	4	1.0624
MRPS30	6	0.98678	0.98704	0.999997	1460	0	0.93815	0.0069571	0.025948	0.377966	106	4	0.93815
PSMD6	6	0.037713	0.095024	0.734774	177	3	0.081411	0.0072146	0.026673	0.384889	107	3	0.081411
FXN	6	0.99908	0.99907	0.999997	1509	0	0.96075	0.007578	0.027558	0.393977	108	4	0.96075
PHB	6	0.0035273	0.012482	0.310843	62	3	-0.42377	0.0083791	0.029687	0.42052	109	2	-0.42377
DNM2	6	0.80187	0.80176	0.999997	1143	0	0.90469	0.0085347	0.030117	0.422727	110	4	0.90469
SNRPA	6	0.96579	0.96599	0.999997	1402	0	0.86865	0.0087924	0.030867	0.426639	111	4	0.86865
CCT6A	6	0.94519	0.94566	0.999997	1366	0	0.63452	0.0089624	0.031335	0.426639	112	3	0.63452
DDI2	6	0.97852	0.97889	0.999997	1435	0	0.84373	0.0090556	0.031694	0.426639	113	4	0.84373
RPLP0	6	0.17411	0.28969	0.999997	409	1	1.0289	0.0091464	0.031906	0.426639	114	4	1.0289
RPL13	6	0.99336	0.99367	0.999997	1481	0	0.83745	0.0092015	0.032053	0.426639	115	4	0.83745
HSD17B10	6	0.98902	0.98942	0.999997	1468	0	0.96245	0.0094154	0.032733	0.431962	116	3	0.96245
SRSF7	5	0.045164	0.10561	0.751449	194	2	-0.41997	0.0094528	0.030982	0.426639	117	2	-0.41997
PRRC2A	6	0.97767	0.97803	0.999997	1427	0	0.80741	0.009725	0.033567	0.43921	118	4	0.80741
SSRP1	6	0.96935	0.96963	0.999997	1413	0	0.61462	0.010193	0.034926	0.453158	119	4	0.61462
MTOR	6	0.99056	0.99089	0.999997	1473	0	0.91653	0.010428	0.035689	0.4592	120	4	0.91653
EIF3I	6	0.8812	0.88164	0.999997	1262	0	1.0801	0.010671	0.036401	0.464487	121	4	1.0801
VCP	6	0.051853	0.12222	0.794843	209	1	0.011633	0.01128	0.037978	0.480644	122	1	0.011633
NLE1	6	0.99412	0.99449	0.999997	1487	0	0.96731	0.0117	0.039235	0.492295	123	4	0.96731
U2AF2	6	0.01922	0.058184	0.598911	136	1	0.89138	0.011833	0.039537	0.492295	124	3	0.89138
PSMA1	6	0.64457	0.65597	0.999997	925	1	-0.028993	0.012004	0.040043	0.494614	125	1	-0.028993
PSMD11	6	0.34024	0.47223	0.999997	656	2	0.25162	0.012487	0.041704	0.507598	126	3	0.25162
ABCF1	6	0.88938	0.89012	0.999997	1276	0	0.52614	0.012584	0.042057	0.507598	127	2	0.52614
EIF3J	6	0.96047	0.96051	0.999997	1393	0	0.88839	0.01269	0.0423	0.507598	128	4	0.88839
RUVBL2	6	0.28626	0.41272	0.999997	564	1	0.87667	0.012727	0.042409	0.507598	129	3	0.87667
DDX21	6	0.73041	0.72974	0.999997	1024	1	1.0356	0.012981	0.043121	0.512148	130	4	1.0356
RPL37A	6	0.16272	0.27748	0.988422	396	2	0.4949	0.013451	0.044417	0.523505	131	3	0.4949
LRRC59	6	0.87845	0.8788	0.999997	1259	0	0.73852	0.013826	0.045398	0.531016	132	4	0.73852
IMPA2	6	0.91038	0.91075	0.999997	1307	0	0.75373	0.01432	0.046905	0.539017	133	4	0.75373
NME6	6	0.99594	0.9961	0.999997	1495	0	0.79412	0.01442	0.047129	0.539017	134	4	0.79412
PSMA6	5	0.0027389	0.0099747	0.265534	58	2	-0.13124	0.014839	0.047026	0.539017	135	1	-0.13124
FAM98A	6	0.9644	0.96469	0.999997	1400	0	0.74364	0.015265	0.049495	0.561918	136	3	0.74364
PSMB5	6	0.027768	0.07546	0.663563	156	2	0.70582	0.015989	0.051592	0.581448	137	4	0.70582
IGBP1	6	0.21501	0.33429	0.999997	459	1	0.71915	0.0166	0.053292	0.596248	138	4	0.71915
DCTN2	6	0.9868	0.98706	0.999997	1461	0	0.8277	0.016822	0.054023	0.599463	139	3	0.8277
RPL9	6	0.67463	0.67954	0.999997	961	1	0.53587	0.01706	0.054728	0.599463	140	3	0.53587
PRKCSH	6	0.98631	0.98667	0.999997	1459	0	0.85067	0.017122	0.054869	0.599463	141	4	0.85067
PABPN1	6	0.20962	0.3282	0.999997	452	1	0.78195	0.017211	0.055132	0.599463	142	3	0.78195
TRMT1	6	0.99657	0.99663	0.999997	1498	0	0.83508	0.017492	0.056062	0.601107	143	4	0.83508
QARS1	6	0.6458	0.65689	0.999997	926	1	0.95074	0.017693	0.056639	0.602841	144	4	0.95074
UBR4	6	0.95203	0.95238	0.999997	1383	0	0.76354	0.017809	0.057004	0.602841	145	4	0.76354
TUBB6	6	0.55036	0.59013	0.999997	841	1	0.7729	0.018003	0.057453	0.603455	146	4	0.7729
USP7	6	0.98066	0.98095	0.999997	1440	0	0.79641	0.019179	0.060666	0.631437	147	3	0.79641
LMNA	6	0.99488	0.99519	0.999997	1490	0	0.65726	0.019694	0.061993	0.637424	148	4	0.65726
SELENOO	6	0.79318	0.79279	0.999997	1130	0	0.69699	0.020027	0.062872	0.637424	149	4	0.69699
NMT1	6	0.8335	0.83366	0.999997	1190	0	0.73128	0.020196	0.063302	0.637424	150	4	0.73128
PSMC4	6	0.62499	0.64075	0.999997	907	1	0.802	0.020323	0.063577	0.637424	151	4	0.802
PRMT1	6	0.39172	0.50084	0.999997	705	1	-0.24957	0.020658	0.064552	0.643021	152	2	-0.24957
RPL24	6	0.96919	0.96947	0.999997	1411	0	0.75208	0.021052	0.065469	0.644479	153	4	0.75208
RPL26	6	0.53164	0.57832	0.999997	824	1	-0.24526	0.02109	0.065533	0.644479	154	2	-0.24526
NUDT21	6	0.030602	0.080814	0.697079	160	2	0.003959	0.021377	0.066187	0.645464	155	2	0.003959
ARHGDIA	6	0.99576	0.99593	0.999997	1492	0	0.65544	0.02149	0.066469	0.645464	156	4	0.65544
DDX17	6	0.57423	0.60573	0.999997	858	1	0.62428	0.021889	0.067758	0.649175	157	4	0.62428
SNRPF	4	0.23816	0.31691	0.999997	488	1	-0.44682	0.021995	0.055882	0.601107	158	1	-0.44682
PHB2	5	0.079309	0.15785	0.872428	262	1	0.32514	0.022043	0.062641	0.637424	159	2	0.32514
RBM22	6	0.1584	0.27265	0.98166	390	1	-0.19425	0.022095	0.068271	0.649175	160	1	-0.19425
NAA15	6	0.026948	0.073914	0.659675	154	3	-0.021793	0.02221	0.068521	0.649175	161	3	-0.021793
TRMT10C	6	0.5328	0.57901	0.999997	826	1	0.85326	0.022293	0.06872	0.649175	162	4	0.85326
RPS9	6	0.041313	0.10217	0.747433	184	1	0.74963	0.022428	0.069079	0.649175	163	4	0.74963
RPL15	6	0.15903	0.27339	0.98166	393	1	0.76077	0.022565	0.069374	0.649175	164	4	0.76077
CSTA	6	0.55111	0.59057	0.999997	842	1	0.6961	0.023488	0.07201	0.665767	165	4	0.6961
PSMC1	6	0.038349	0.096352	0.734774	179	2	0.095102	0.024604	0.074819	0.683549	166	1	0.095102
SEC22B	6	0.0070645	0.023826	0.418036	88	3	-0.53726	0.024604	0.074819	0.683549	167	2	-0.53726
MIF	6	0.96923	0.96954	0.999997	1412	0	0.71139	0.025086	0.076204	0.68999	168	3	0.71139
MRPL11	6	0.7538	0.75319	0.999997	1062	0	0.70447	0.025187	0.076518	0.68999	169	3	0.70447
RPL10A	6	0.0018265	0.0073905	0.219821	51	1	0.58885	0.02532	0.076864	0.68999	170	3	0.58885
EWSR1	6	0.99358	0.99387	0.999997	1482	0	0.67188	0.025809	0.078102	0.697047	171	4	0.67188
PVALB	6	0.56408	0.59899	0.999997	853	1	0.63511	0.02621	0.079256	0.703283	172	4	0.63511
SNRPD3	5	3.25e-05	0.00015711	0.01866	13	3	-2.4629	0.026225	0.071356	0.663694	173	2	-2.4629
NUP43	6	0.45278	0.53243	0.999997	758	1	0.53504	0.027389	0.082385	0.720034	174	3	0.53504
DUT	6	0.0014759	0.0061657	0.202549	47	2	0.53974	0.027611	0.082841	0.720034	175	3	0.53974
EFHD2	6	0.86458	0.86505	0.999997	1240	0	0.63302	0.027805	0.083431	0.720034	176	4	0.63302
HSPA8	6	0.00063824	0.0026259	0.122862	33	2	0.50693	0.028434	0.085168	0.727942	177	3	0.50693
WARS1	6	0.93185	0.93217	0.999997	1343	0	0.83198	0.028509	0.085335	0.727942	178	4	0.83198
TUBB	6	0.97061	0.9709	0.999997	1416	0	0.62472	0.028868	0.086239	0.731564	179	4	0.62472
UBA5	6	0.68705	0.68978	0.999997	969	1	0.71606	0.029084	0.086707	0.731564	180	4	0.71606
DHX30	6	0.78701	0.78668	0.999997	1121	0	0.45922	0.029312	0.087445	0.733776	181	3	0.45922
RBPMS	6	0.87655	0.87687	0.999997	1256	0	0.35336	0.029656	0.088311	0.737035	182	3	0.35336
CAPZA2	6	0.52223	0.57257	0.999997	811	1	0.25249	0.0302	0.089625	0.743985	183	3	0.25249
DNAJC9	5	0.0057751	0.01969	0.375321	81	1	0.16056	0.030691	0.080077	0.706506	184	1	0.16056
RPL7	6	0.18767	0.30421	0.999997	426	2	0.32169	0.031329	0.09235	0.756745	185	2	0.32169
CCT7	6	0.34323	0.47551	0.999997	660	2	0.67299	0.031645	0.093152	0.756983	186	4	0.67299
PSMD14	6	0.78801	0.78768	0.999997	1123	0	0.75438	0.032099	0.094441	0.763439	187	3	0.75438
PRPF38A	5	0.024638	0.062115	0.610866	150	2	0.88624	0.032326	0.083475	0.720034	188	3	0.88624
HSPB1	6	0.98508	0.98549	0.999997	1454	0	0.70221	0.032512	0.095435	0.767456	189	4	0.70221
SRSF10	6	0.95967	0.95987	0.999997	1390	0	0.66552	0.033338	0.097679	0.781434	190	3	0.66552
RPS27A	6	0.91884	0.91931	0.999997	1320	0	0.68369	0.034004	0.099513	0.787941	191	3	0.68369
EIF3M	6	0.7309	0.73023	0.999997	1025	1	0.55921	0.034718	0.10136	0.795745	192	4	0.55921
UBA2	6	0.8155	0.81569	0.999997	1163	0	-0.12619	0.034942	0.10203	0.795745	193	1	-0.12619
RPS5	6	0.78295	0.78277	0.999997	1113	0	0.066733	0.03507	0.10235	0.795745	194	2	0.066733
PAFAH1B1	6	0.011795	0.037754	0.529503	105	4	-0.68636	0.035531	0.10346	0.795745	195	2	-0.68636
PPP2CA	6	0.98461	0.98502	0.999997	1452	0	0.5405	0.03564	0.10373	0.795745	196	4	0.5405
SRSF5	6	0.8568	0.85721	0.999997	1222	0	0.58395	0.036014	0.10471	0.795745	197	4	0.58395
RBM8A	6	0.022095	0.063975	0.61909	143	1	0.2229	0.036304	0.10539	0.795745	198	3	0.2229
TOMM22	6	0.96574	0.96596	0.999997	1401	0	0.58962	0.03639	0.10557	0.795745	199	4	0.58962
ATP2A2	6	0.00062202	0.0025554	0.122862	32	4	-1.2345	0.036715	0.10642	0.795745	200	2	-1.2345
IST1	6	0.43348	0.522	0.999997	738	1	0.58771	0.03715	0.10757	0.795745	201	4	0.58771
TRIM56	6	0.96596	0.96622	0.999997	1403	0	0.63561	0.037405	0.10824	0.795745	202	4	0.63561
SNRNP70	6	0.99302	0.99339	0.999997	1479	0	0.74659	0.037533	0.10849	0.795745	203	4	0.74659
FKBP1A	6	0.82666	0.8267	0.999997	1179	0	0.61313	0.037598	0.1086	0.795745	204	4	0.61313
GRPEL1	6	0.0045578	0.015727	0.349491	69	2	-0.1124	0.037778	0.1092	0.795745	205	1	-0.1124
KRT15	6	0.8888	0.8895	0.999997	1274	0	0.64842	0.037802	0.10926	0.795745	206	3	0.64842
DNMT1	6	0.9936	0.99389	0.999997	1483	0	0.65239	0.037985	0.10982	0.7961	207	4	0.65239
EEF1G	6	0.93317	0.93346	0.999997	1346	0	0.41591	0.039147	0.11238	0.808128	208	3	0.41591
TXN	6	0.47964	0.54712	0.999997	776	1	0.71992	0.039241	0.11253	0.808128	209	3	0.71992
PNO1	6	0.81389	0.81415	0.999997	1159	0	0.3775	0.039791	0.11357	0.809577	210	3	0.3775
TARS1	6	0.19019	0.30716	0.999997	431	1	-0.089106	0.0399	0.11378	0.809577	211	1	-0.089106
ADSL	6	0.98154	0.98196	0.999997	1445	0	0.69021	0.041363	0.11635	0.824076	212	3	0.69021
DDX3X	4	0.092398	0.15907	0.872428	287	1	0.57714	0.041502	0.098878	0.78695	213	2	0.57714
EIF3A	6	0.78961	0.78941	0.999997	1124	0	0.76189	0.041926	0.11733	0.82723	214	3	0.76189
SARS2	6	0.9247	0.92517	0.999997	1330	0	0.52356	0.042409	0.11831	0.828578	215	2	0.52356
SFPQ	4	0.80278	0.80352	0.999997	1146	0	0.62259	0.043397	0.1029	0.795745	216	2	0.62259
MACROD1	6	0.59635	0.62078	0.999997	883	1	0.28173	0.043644	0.12038	0.828578	217	3	0.28173
DHCR7	6	0.96859	0.96889	0.999997	1408	0	0.5335	0.043934	0.12085	0.828578	218	3	0.5335
ETF1	5	0.99142	0.99166	0.999997	1476	0	0.39698	0.043989	0.10693	0.795745	219	2	0.39698
RBM10	6	0.93131	0.93164	0.999997	1342	0	0.70843	0.044226	0.12135	0.828578	220	3	0.70843
EIF4G1	6	0.79436	0.79388	0.999997	1133	0	0.21021	0.044249	0.12141	0.828578	221	2	0.21021
LARS1	6	0.89318	0.89393	0.999997	1283	0	0.45875	0.04442	0.1217	0.828578	222	3	0.45875
AARS1	6	0.072688	0.16074	0.873884	250	3	-0.16223	0.044485	0.12184	0.828578	223	2	-0.16223
IPO7	6	0.48849	0.55205	0.999997	782	1	0.45898	0.044616	0.12212	0.828578	224	3	0.45898
CDK2	6	0.89498	0.89556	0.999997	1286	0	0.083716	0.044756	0.12235	0.828578	225	2	0.083716
LDHA	6	0.99439	0.99478	0.999997	1488	0	0.3136	0.046464	0.12525	0.840788	226	2	0.3136
RPS4X	6	0.20056	0.31817	0.999997	442	2	0.16982	0.049052	0.12942	0.865008	227	3	0.16982
RPS2	6	0.85651	0.85693	0.999997	1221	0	0.30503	0.050845	0.13259	0.874161	228	2	0.30503
FBL	6	0.062762	0.14267	0.82302	231	2	0.52368	0.051012	0.13294	0.874161	229	3	0.52368
CAPN2	6	0.9713	0.97157	0.999997	1418	0	0.64235	0.051117	0.13312	0.874161	230	3	0.64235
TRA2A	6	0.98746	0.98776	0.999997	1462	0	0.57656	0.051223	0.13333	0.874161	231	3	0.57656
RCC1	6	0.12754	0.23961	0.960949	352	1	0.16145	0.051382	0.13362	0.874161	232	2	0.16145
MRM2	6	0.99122	0.99156	0.999997	1475	0	0.66323	0.053791	0.13778	0.893856	233	3	0.66323
CTTN	6	0.99918	0.9992	0.999997	1512	0	0.68409	0.054554	0.13913	0.896143	234	3	0.68409
TUBB4B	6	0.93908	0.93955	0.999997	1357	0	0.52063	0.054647	0.1393	0.896143	235	3	0.52063
PSMC5	6	0.61815	0.63594	0.999997	900	1	-0.042201	0.055383	0.14066	0.901175	236	2	-0.042201
MRPS9	6	0.41595	0.51343	0.999997	726	1	-0.064629	0.056867	0.1431	0.912998	237	2	-0.064629
RPL4	6	0.05834	0.13446	0.806854	225	3	-0.015491	0.057241	0.14379	0.913601	238	3	-0.015491
CCS	6	0.59013	0.61649	0.999997	875	1	0.47996	0.05834	0.14566	0.918266	239	3	0.47996
PSMA3	6	0.33816	0.46989	0.999997	651	1	0.085999	0.058367	0.14571	0.918266	240	2	0.085999
HNRNPUL1	6	0.88595	0.88651	0.999997	1270	0	0.38691	0.059023	0.14675	0.921094	241	3	0.38691
CTRL46	1	0.9395	0.93922	0.999997	1358	0	1.5161	0.060505	0.060935	0.631437	242	1	1.5161
NDUFS2	6	0.39317	0.50161	0.999997	707	1	0.52399	0.060836	0.1498	0.936405	243	3	0.52399
MRPL39	6	0.63897	0.65166	0.999997	917	1	0.5165	0.061797	0.15137	0.942371	244	3	0.5165
RPL14	6	0.20177	0.31952	0.999997	443	1	0.4346	0.062296	0.15237	0.944789	245	3	0.4346
HNRNPD	6	0.94281	0.94337	0.999997	1363	0	0.60067	0.063685	0.15478	0.952132	246	3	0.60067
KRT4	6	0.92948	0.92991	0.999997	1339	0	0.53606	0.064881	0.15666	0.959633	247	3	0.53606
CRIP2	6	0.054097	0.12647	0.794843	214	2	0.20403	0.065242	0.15725	0.959633	248	3	0.20403
CIRBP	6	0.46895	0.54093	0.999997	769	1	0.5643	0.066696	0.15962	0.970317	249	3	0.5643
RPS16	6	0.0047432	0.016298	0.349491	72	3	0.011224	0.06743	0.16104	0.975053	250	3	0.011224
RPL7A	6	0.92745	0.92803	0.999997	1337	0	0.73447	0.06916	0.16395	0.984956	251	3	0.73447
ZC3HAV1L	6	0.97801	0.97834	0.999997	1431	0	0.51339	0.072051	0.16862	0.999997	252	3	0.51339
SQSTM1	6	0.36616	0.48872	0.999997	678	1	0.49309	0.073585	0.1713	0.999997	253	3	0.49309
HNRNPA3	6	0.27347	0.3991	0.999997	540	1	0.1031	0.073758	0.17162	0.999997	254	2	0.1031
FAHD2A	6	0.32228	0.45233	0.999997	621	2	0.17279	0.073842	0.17176	0.999997	255	3	0.17279
RBM4	6	0.33425	0.46545	0.999997	645	2	0.36359	0.074617	0.17295	0.999997	256	3	0.36359
PRPF8	6	0.10038	0.21029	0.933012	305	2	-0.08556	0.074701	0.1731	0.999997	257	1	-0.08556
NDUFS8	6	0.75175	0.75104	0.999997	1058	0	0.4346	0.076037	0.17543	0.999997	258	3	0.4346
SEC63	6	0.84497	0.84507	0.999997	1202	0	0.61244	0.076311	0.17587	0.999997	259	3	0.61244
CMPK1	6	0.95025	0.95052	0.999997	1378	0	0.48282	0.077081	0.17714	0.999997	260	2	0.48282
MCM3	6	0.6333	0.64731	0.999997	912	1	0.423	0.078156	0.179	0.999997	261	3	0.423
RBM45	6	0.74174	0.74099	0.999997	1039	0	-0.060855	0.078806	0.18009	0.999997	262	1	-0.060855
EDC4	6	0.98852	0.98879	0.999997	1466	0	0.57811	0.079819	0.18179	0.999997	263	3	0.57811
SF3B3	6	0.29395	0.42135	0.999997	577	1	0.20909	0.080031	0.18219	0.999997	264	2	0.20909
ARPC4	6	0.48176	0.54824	0.999997	777	1	0.50939	0.081918	0.18545	0.999997	265	3	0.50939
RPS13	6	0.40844	0.50942	0.999997	718	1	0.37118	0.082164	0.18586	0.999997	266	2	0.37118
VBP1	6	0.83135	0.83146	0.999997	1187	0	-0.02426	0.082807	0.18687	0.999997	267	2	-0.02426
SPR	6	0.41549	0.51319	0.999997	725	1	0.021654	0.083237	0.18754	0.999997	268	2	0.021654
RBBP4	6	0.73456	0.73389	0.999997	1030	1	0.1098	0.085617	0.19119	0.999997	269	2	0.1098
SNRNP200	6	0.14748	0.2608	0.98166	374	2	0.67148	0.085632	0.19121	0.999997	270	3	0.67148
DARS1	6	0.45322	0.53264	0.999997	759	1	0.045158	0.089001	0.19669	0.999997	271	2	0.045158
GRB7	6	0.057428	0.13267	0.800182	224	2	0.40772	0.089574	0.19766	0.999997	272	3	0.40772
GALK1	6	0.73841	0.73758	0.999997	1034	1	-0.25008	0.089677	0.19781	0.999997	273	2	-0.25008
GATB	6	0.80414	0.80405	0.999997	1151	0	0.34627	0.090288	0.19878	0.999997	274	3	0.34627
WDR33	6	0.070582	0.15705	0.872428	243	2	0.60446	0.091148	0.2003	0.999997	275	3	0.60446
CTRL162	1	0.90769	0.90812	0.999997	1300	0	1.1953	0.092311	0.092517	0.756745	276	1	1.1953
CTRL193	1	0.90757	0.90796	0.999997	1299	0	1.205	0.092432	0.092633	0.756745	277	1	1.205
API5	6	0.89238	0.89323	0.999997	1281	0	0.39231	0.093171	0.20352	0.999997	278	3	0.39231
UCHL1	6	0.34075	0.47284	0.999997	657	1	0.50189	0.093461	0.20407	0.999997	279	3	0.50189
ZCCHC3	6	0.3756	0.4933	0.999997	690	1	0.47989	0.093899	0.20476	0.999997	280	3	0.47989
HDGF	6	0.32198	0.452	0.999997	619	2	0.064064	0.094693	0.20608	0.999997	281	2	0.064064
LIG3	6	0.98504	0.98543	0.999997	1453	0	0.52892	0.095069	0.20673	0.999997	282	3	0.52892
RPL27A	6	0.82969	0.82967	0.999997	1183	0	0.45017	0.096839	0.20965	0.999997	283	3	0.45017
HNRNPU	6	0.3059	0.43462	0.999997	596	1	0.16983	0.099102	0.21327	0.999997	284	2	0.16983
H1-4	6	0.99376	0.99412	0.999997	1484	0	0.55356	0.099225	0.21345	0.999997	285	3	0.55356
OGFR	6	0.078289	0.17121	0.883973	259	3	-0.48198	0.099235	0.21348	0.999997	286	2	-0.48198
GIGYF2	6	0.9985	0.9985	0.999997	1507	0	0.54749	0.099976	0.21474	0.999997	287	3	0.54749
CDKN2AIP	6	0.66915	0.67481	0.999997	952	1	0.33166	0.10118	0.21676	0.999997	288	3	0.33166
RAN	4	0.53027	0.53317	0.999997	823	1	0.52878	0.10143	0.18405	0.999997	289	2	0.52878
GSPT1	6	0.69692	0.69848	0.999997	978	1	0.021987	0.10245	0.21905	0.999997	290	1	0.021987
TUBA1C	5	0.099099	0.18245	0.90291	303	2	0.55695	0.10442	0.21843	0.999997	291	3	0.55695
RPS3A	6	0.7601	0.75949	0.999997	1077	0	0.36227	0.10512	0.2232	0.999997	292	2	0.36227
SRP9	6	0.26615	0.39098	0.999997	525	1	0.58844	0.1064	0.22523	0.999997	293	3	0.58844
YWHAE	6	0.66973	0.67533	0.999997	954	1	0.38674	0.10671	0.22569	0.999997	294	3	0.38674
ANXA11	6	0.95097	0.95125	0.999997	1381	0	0.52377	0.10812	0.22787	0.999997	295	3	0.52377
EIF3H	6	0.56151	0.59738	0.999997	849	1	0.44683	0.10827	0.22809	0.999997	296	3	0.44683
XAB2	6	0.72845	0.72786	0.999997	1022	1	0.36475	0.10921	0.22945	0.999997	297	3	0.36475
TUBA1A	6	0.16539	0.28055	0.989639	400	2	-0.33937	0.10977	0.23034	0.999997	298	1	-0.33937
CFL1	6	0.92436	0.92487	0.999997	1329	0	0.63251	0.10984	0.23045	0.999997	299	3	0.63251
HSP90AB1	6	0.7282	0.72761	0.999997	1021	1	0.16434	0.11019	0.23098	0.999997	300	2	0.16434
EZR	6	0.84955	0.84972	0.999997	1209	0	0.50581	0.11063	0.23174	0.999997	301	3	0.50581
PPA1	6	0.96871	0.969	0.999997	1409	0	0.18597	0.1111	0.23239	0.999997	302	2	0.18597
SNRPB2	6	0.46635	0.53963	0.999997	766	1	-0.12426	0.11137	0.23291	0.999997	303	2	-0.12426
RBM14	6	0.91775	0.91819	0.999997	1315	0	0.35654	0.11176	0.23356	0.999997	304	2	0.35654
SAFB	6	0.37214	0.49156	0.999997	687	1	0.21531	0.11206	0.23398	0.999997	305	3	0.21531
RNY4	6	0.0050559	0.017304	0.365998	73	2	0.03538	0.11424	0.23727	0.999997	306	3	0.03538
HNRNPLL	6	0.3893	0.49964	0.999997	703	1	0.54058	0.11479	0.23821	0.999997	307	3	0.54058
RPL29	6	0.14335	0.25645	0.98166	366	2	-0.039543	0.11507	0.23865	0.999997	308	1	-0.039543
WDR1	6	0.97855	0.97893	0.999997	1436	0	0.62344	0.11608	0.2403	0.999997	309	3	0.62344
IGF2BP2	6	0.85016	0.85033	0.999997	1212	0	0.53573	0.11657	0.24113	0.999997	310	3	0.53573
LETM1	6	0.097089	0.20469	0.928246	292	1	0.54599	0.11706	0.24193	0.999997	311	3	0.54599
SMU1	5	9.3e-06	4.17e-05	0.008045	9	4	-3.2026	0.11744	0.2334	0.999997	312	1	-3.2026
PSME3	6	0.94623	0.94678	0.999997	1368	0	0.37888	0.11885	0.24499	0.999997	313	3	0.37888
RBMX	6	0.15583	0.26993	0.98166	386	2	0.17568	0.11956	0.24601	0.999997	314	2	0.17568
PSMD3	6	0.87858	0.87888	0.999997	1260	0	0.34254	0.12034	0.24716	0.999997	315	2	0.34254
CNOT11	6	0.38833	0.49922	0.999997	702	1	0.24197	0.12078	0.24784	0.999997	316	2	0.24197
HIRA	6	0.9448	0.94522	0.999997	1365	0	0.13976	0.12175	0.24946	0.999997	317	2	0.13976
ACTR3	6	0.091336	0.19453	0.907436	284	2	0.28616	0.12182	0.24959	0.999997	318	3	0.28616
TRMT112	6	0.71382	0.71381	0.999997	1001	1	0.62971	0.12332	0.25207	0.999997	319	3	0.62971
CTRL194	1	0.87661	0.87652	0.999997	1257	0	1.0059	0.12339	0.12423	0.837585	320	1	1.0059
RNPS1	6	0.9683	0.96858	0.999997	1407	0	0.43412	0.12382	0.25297	0.999997	321	3	0.43412
CORO1B	6	0.98443	0.98477	0.999997	1450	0	0.372	0.12617	0.25655	0.999997	322	3	0.372
PPP6C	6	0.99304	0.9934	0.999997	1480	0	0.31977	0.12643	0.25697	0.999997	323	2	0.31977
DDX18	6	0.27673	0.40262	0.999997	545	2	-0.044227	0.12668	0.25742	0.999997	324	2	-0.044227
PRSS3	6	0.84311	0.84317	0.999997	1199	0	0.32464	0.12668	0.25742	0.999997	325	3	0.32464
CAPZB	6	0.53821	0.58239	0.999997	832	1	-0.080792	0.12754	0.25873	0.999997	326	1	-0.080792
GSS	6	0.66358	0.67053	0.999997	946	1	0.49649	0.1282	0.25983	0.999997	327	3	0.49649
EIF4A1	6	0.96738	0.96787	0.999997	1406	0	0.37742	0.12957	0.26187	0.999997	328	3	0.37742
PARP1	6	0.74597	0.7452	0.999997	1048	0	0.53442	0.12974	0.26214	0.999997	329	3	0.53442
MVD	6	0.99475	0.99504	0.999997	1489	0	0.44289	0.13091	0.264	0.999997	330	3	0.44289
MATR3	6	0.99793	0.99794	0.999997	1502	0	0.51668	0.13249	0.26652	0.999997	331	3	0.51668
RPL23	6	0.43394	0.52223	0.999997	740	1	0.48073	0.13266	0.26682	0.999997	332	3	0.48073
ECHDC3	6	0.89753	0.8983	0.999997	1288	0	0.084571	0.13367	0.26836	0.999997	333	2	0.084571
RPL36A	6	0.043076	0.10555	0.751449	190	2	-0.2231	0.13418	0.26902	0.999997	334	2	-0.2231
HMGB1	6	0.071544	0.1586	0.872428	245	3	-0.030585	0.13457	0.26969	0.999997	335	3	-0.030585
LONP1	6	0.32647	0.45698	0.999997	630	2	-0.15296	0.13468	0.26984	0.999997	336	2	-0.15296
CTRL152	1	0.86492	0.86508	0.999997	1241	0	0.99561	0.13508	0.13565	0.883716	337	1	0.99561
MCM4	6	0.68399	0.68711	0.999997	965	1	0.01851	0.13793	0.27499	0.999997	338	1	0.01851
RPL11	6	0.047197	0.11331	0.762656	200	3	-0.052627	0.13824	0.27558	0.999997	339	3	-0.052627
VPS35	6	0.0056416	0.019158	0.375321	78	3	-0.21907	0.14001	0.27827	0.999997	340	3	-0.21907
PIP	6	0.63928	0.6519	0.999997	918	1	0.23797	0.14107	0.27994	0.999997	341	3	0.23797
TAGLN2	6	0.82375	0.82391	0.999997	1177	0	0.49035	0.14125	0.28026	0.999997	342	3	0.49035
PUS1	6	0.909	0.90937	0.999997	1304	0	0.40526	0.14161	0.2808	0.999997	343	3	0.40526
HTATIP2	6	0.93691	0.93731	0.999997	1353	0	0.51527	0.14178	0.2811	0.999997	344	3	0.51527
PSMC2	6	0.87616	0.87645	0.999997	1255	0	0.59069	0.14285	0.28284	0.999997	345	3	0.59069
SAFB2	6	0.73552	0.7349	0.999997	1032	1	0.39742	0.14321	0.28332	0.999997	346	3	0.39742
RANBP1	6	0.96436	0.96465	0.999997	1399	0	0.41326	0.14429	0.28489	0.999997	347	3	0.41326
TBCD	6	0.075387	0.16586	0.876508	255	2	0.46281	0.14519	0.28623	0.999997	348	3	0.46281
TALDO1	6	0.66944	0.67504	0.999997	953	1	0.14107	0.14717	0.28922	0.999997	349	3	0.14107
IMMT	6	0.15269	0.26643	0.98166	382	2	-0.097827	0.14748	0.28976	0.999997	350	2	-0.097827
QRSL1	6	0.80675	0.80671	0.999997	1155	0	0.4806	0.14917	0.29236	0.999997	351	3	0.4806
EIF3F	6	0.86009	0.86063	0.999997	1227	0	0.51339	0.14929	0.29254	0.999997	352	2	0.51339
SLC25A1	6	0.5929	0.61826	0.999997	878	1	0.53334	0.15045	0.29442	0.999997	353	3	0.53334
TCERG1	6	0.56261	0.59806	0.999997	851	1	0.46713	0.15173	0.29653	0.999997	354	3	0.46713
DDX39B	6	0.9083	0.9086	0.999997	1301	0	0.36664	0.15229	0.29744	0.999997	355	3	0.36664
TFAM	6	0.35254	0.48214	0.999997	672	1	0.42411	0.15358	0.29939	0.999997	356	3	0.42411
CTRL54	1	0.84627	0.84636	0.999997	1204	0	0.84782	0.15373	0.1539	0.950475	357	1	0.84782
TOMM70	6	0.57459	0.60598	0.999997	859	1	0.44045	0.15432	0.30053	0.999997	358	3	0.44045
ATIC	6	0.8194	0.81959	0.999997	1169	0	0.49007	0.1545	0.30082	0.999997	359	3	0.49007
HNRNPR	6	0.53242	0.57872	0.999997	825	1	0.21173	0.15692	0.30489	0.999997	360	3	0.21173
RPSA	6	0.18404	0.30021	0.999997	422	1	0.063992	0.15768	0.30591	0.999997	361	2	0.063992
HSD17B2	6	0.4939	0.55521	0.999997	787	1	0.47223	0.15822	0.30672	0.999997	362	3	0.47223
GNB2	6	0.97954	0.97982	0.999997	1438	0	0.38258	0.1584	0.30701	0.999997	363	2	0.38258
CSE1L	6	0.0014138	0.0059028	0.198127	46	3	-0.8781	0.15967	0.30908	0.999997	364	1	-0.8781
PSMD4	6	0.93052	0.93089	0.999997	1341	0	0.35399	0.16104	0.31132	0.999997	365	3	0.35399
DHX9	6	0.091704	0.19514	0.907506	286	1	-0.11412	0.16165	0.31235	0.999997	366	2	-0.11412
CTRL85	1	0.83823	0.83816	0.999997	1195	0	0.82174	0.16177	0.16172	0.975344	367	1	0.82174
RNF213	6	0.22369	0.34397	0.999997	469	2	0.29797	0.1618	0.31252	0.999997	368	3	0.29797
TUBB3	6	0.58488	0.61294	0.999997	868	1	0.036361	0.16218	0.31305	0.999997	369	2	0.036361
ACTR2	6	0.77652	0.77607	0.999997	1101	0	0.32094	0.16219	0.31306	0.999997	370	1	0.32094
APOBEC3G	6	0.49058	0.55316	0.999997	784	1	0.40509	0.16485	0.31717	0.999997	371	2	0.40509
SAE1	6	0.24036	0.36227	0.999997	490	1	0.57073	0.16502	0.31741	0.999997	372	3	0.57073
RPS18	6	0.011626	0.037241	0.529503	104	3	-0.18509	0.16866	0.32296	0.999997	373	3	-0.18509
EXOSC7	5	0.5675	0.58051	0.999997	855	1	-0.055849	0.16898	0.28797	0.999997	374	2	-0.055849
CTRL154	1	0.82994	0.82982	0.999997	1185	0	0.77166	0.17006	0.16972	0.999997	375	1	0.77166
CCT2	6	0.053251	0.12484	0.794843	211	2	0.23876	0.17021	0.3253	0.999997	376	3	0.23876
ST13	6	0.78356	0.78338	0.999997	1115	0	0.23104	0.17076	0.32608	0.999997	377	2	0.23104
CTRL50	1	0.82909	0.82897	0.999997	1182	0	0.77765	0.17091	0.17055	0.999997	378	1	0.77765
ATP6V1E1	6	0.80301	0.80292	0.999997	1147	0	-0.01021	0.17161	0.32729	0.999997	379	2	-0.01021
HECTD1	6	0.82237	0.82259	0.999997	1174	0	0.2487	0.17373	0.32953	0.999997	380	2	0.2487
TBL2	6	0.71817	0.7178	0.999997	1011	1	0.13333	0.17411	0.3299	0.999997	381	1	0.13333
MYH7	6	0.27467	0.40035	0.999997	543	2	-0.029406	0.17454	0.33024	0.999997	382	2	-0.029406
ARF4	6	0.19386	0.311	0.999997	437	1	-0.032603	0.17722	0.3326	0.999997	383	1	-0.032603
CCT3	6	0.70494	0.70582	0.999997	986	1	0.085668	0.17726	0.33262	0.999997	384	2	0.085668
CRKL	6	0.2404	0.36231	0.999997	491	2	0.025666	0.17835	0.33365	0.999997	385	2	0.025666
TJP2	6	0.25907	0.38299	0.999997	512	2	0.078621	0.1819	0.33678	0.999997	386	2	0.078621
TARS2	6	0.96032	0.9604	0.999997	1392	0	0.074592	0.18519	0.33977	0.999997	387	2	0.074592
PSMA7	6	0.10153	0.21157	0.935984	306	2	-0.030767	0.18629	0.34076	0.999997	388	2	-0.030767
MYOM1	6	0.66417	0.67094	0.999997	947	1	0.03749	0.1865	0.34097	0.999997	389	1	0.03749
EIF3B	6	0.26559	0.39032	0.999997	524	1	-0.027661	0.18773	0.3421	0.999997	390	2	-0.027661
KRT78	6	0.30859	0.43736	0.999997	599	1	0.20156	0.18822	0.34256	0.999997	391	2	0.20156
QKI	6	0.27201	0.3973	0.999997	536	2	-0.039694	0.19127	0.34556	0.999997	392	2	-0.039694
CTRL56	1	0.80813	0.80843	0.999997	1156	0	0.69963	0.19187	0.19111	0.999997	393	1	0.69963
SIRT3	6	0.24268	0.36475	0.999997	494	1	0.076268	0.19325	0.34717	0.999997	394	2	0.076268
TNNT3	6	0.98887	0.98928	0.999997	1467	0	0.35501	0.19683	0.35041	0.999997	395	2	0.35501
EIF3G	6	0.92737	0.92793	0.999997	1336	0	0.31379	0.19752	0.35105	0.999997	396	2	0.31379
CAPNS1	6	0.60249	0.62497	0.999997	889	1	-0.26607	0.19813	0.35155	0.999997	397	1	-0.26607
NANS	6	0.69366	0.69552	0.999997	976	1	0.43675	0.19878	0.35204	0.999997	398	2	0.43675
CNBP	6	0.35101	0.48142	0.999997	670	1	0.4563	0.19906	0.35233	0.999997	399	2	0.4563
RPS17	6	0.00093552	0.0038315	0.148639	39	2	0.011307	0.2013	0.35434	0.999997	400	2	0.011307
CTRL37	1	0.79558	0.7963	0.999997	1136	0	0.64846	0.20442	0.20375	0.999997	401	1	0.64846
CTRL156	1	0.79521	0.7959	0.999997	1135	0	0.65338	0.20479	0.20415	0.999997	402	1	0.65338
HNRNPH1	6	0.071957	0.15934	0.872428	247	2	-0.23973	0.2054	0.35834	0.999997	403	1	-0.23973
CTRL121	1	0.79387	0.79437	0.999997	1131	0	0.67328	0.20613	0.20532	0.999997	404	1	0.67328
PAPSS1	6	0.15141	0.26502	0.98166	379	2	-0.10706	0.20661	0.35938	0.999997	405	1	-0.10706
RBM39	6	0.02221	0.064154	0.61909	144	3	-0.62081	0.20833	0.36085	0.999997	406	2	-0.62081
RALY	6	0.95972	0.95989	0.999997	1391	0	0.089718	0.2089	0.36134	0.999997	407	2	0.089718
THUMPD1	6	0.47752	0.54599	0.999997	775	1	-2.4e-05	0.20901	0.36145	0.999997	408	1	-2.4e-05
TOMM34	6	0.82716	0.82722	0.999997	1180	0	0.11929	0.21142	0.36385	0.999997	409	1	0.11929
DCXR	6	0.50091	0.55968	0.999997	792	1	-0.15662	0.21381	0.36608	0.999997	410	1	-0.15662
SERBP1	6	0.12034	0.23171	0.948985	340	1	-0.31602	0.2162	0.36815	0.999997	411	1	-0.31602
ASS1	6	0.65252	0.66204	0.999997	933	1	0.24183	0.21741	0.36924	0.999997	412	2	0.24183
DBNL	6	0.973	0.97317	0.999997	1423	0	0.27971	0.2194	0.37111	0.999997	413	2	0.27971
ACTA1	6	0.52578	0.57478	0.999997	815	1	0.32436	0.22097	0.37259	0.999997	414	2	0.32436
UBE2N	6	0.28295	0.40925	0.999997	560	2	0.43374	0.22226	0.37377	0.999997	415	2	0.43374
GATD3A	6	0.55967	0.59619	0.999997	847	1	-0.087541	0.22254	0.37402	0.999997	416	2	-0.087541
IDI1	6	0.83595	0.83616	0.999997	1193	0	0.012136	0.22275	0.37418	0.999997	417	1	0.012136
RBM4B	6	0.88691	0.88756	0.999997	1271	0	0.34233	0.22393	0.37531	0.999997	418	2	0.34233
SLC25A5	6	0.60215	0.62482	0.999997	888	1	0.22415	0.22426	0.37559	0.999997	419	2	0.22415
PGRMC1	6	0.19404	0.31117	0.999997	438	2	0.093848	0.22483	0.37622	0.999997	420	2	0.093848
WDR12	6	0.23635	0.35767	0.999997	485	2	-0.30861	0.22511	0.37655	0.999997	421	1	-0.30861
LGALS7	6	0.95552	0.95574	0.999997	1386	0	0.024188	0.22655	0.37785	0.999997	422	2	0.024188
FARS2	6	0.0854	0.18385	0.905301	271	2	0.041239	0.23101	0.38196	0.999997	423	1	0.041239
TTN	6	0.86623	0.86661	0.999997	1242	0	-0.092024	0.23115	0.38208	0.999997	424	2	-0.092024
NONO	6	0.9585	0.95869	0.999997	1389	0	0.26232	0.23288	0.3836	0.999997	425	2	0.26232
KRT18	6	0.26288	0.38735	0.999997	521	2	-0.04124	0.23335	0.38401	0.999997	426	1	-0.04124
CHMP4B	6	0.32138	0.4514	0.999997	618	2	0.064922	0.23511	0.38562	0.999997	427	2	0.064922
TPM2	6	0.91784	0.91828	0.999997	1316	0	0.31644	0.23569	0.38617	0.999997	428	2	0.31644
EIF3C	6	0.7476	0.74682	0.999997	1051	0	0.42396	0.23635	0.38665	0.999997	429	2	0.42396
ATP5PB	6	0.73383	0.73314	0.999997	1029	1	0.033542	0.23803	0.3883	0.999997	430	1	0.033542
SNU13	4	0.015937	0.040556	0.529503	126	2	-0.33472	0.24093	0.35941	0.999997	431	2	-0.33472
THOC2	6	0.82358	0.82379	0.999997	1176	0	-0.24182	0.24156	0.39153	0.999997	432	2	-0.24182
CTRL61	1	0.75816	0.75867	0.999997	1074	0	0.54983	0.24184	0.24146	0.999997	433	1	0.54983
TMEM109	6	0.7133	0.71337	0.999997	999	1	0.24289	0.24301	0.39288	0.999997	434	2	0.24289
SAP18	6	0.018501	0.056902	0.597663	134	2	0.22413	0.24326	0.39315	0.999997	435	2	0.22413
FDPS	6	0.98109	0.98145	0.999997	1442	0	0.36898	0.245	0.39494	0.999997	436	2	0.36898
PNP	6	0.28117	0.4073	0.999997	555	2	-0.23161	0.24534	0.39522	0.999997	437	2	-0.23161
RANGAP1	5	0.010831	0.032008	0.479814	102	2	0.13501	0.24548	0.37175	0.999997	438	1	0.13501
AQR	6	0.014708	0.046481	0.550898	120	2	0.12151	0.24621	0.39597	0.999997	439	2	0.12151
HMGN1	6	0.97476	0.97495	0.999997	1426	0	0.40499	0.24767	0.39739	0.999997	440	2	0.40499
CPSF3	6	0.0054713	0.018587	0.375321	75	3	-0.64595	0.25019	0.39967	0.999997	441	1	-0.64595
ADRM1	6	0.70993	0.7102	0.999997	994	1	0.34076	0.25204	0.4014	0.999997	442	2	0.34076
CTRL20	1	0.74708	0.74777	0.999997	1050	0	0.52219	0.25292	0.2524	0.999997	443	0	0.52219
SRI	6	0.87107	0.8713	0.999997	1247	0	0.30611	0.25306	0.4024	0.999997	444	2	0.30611
EIF4A2	6	0.22275	0.34286	0.999997	468	1	-0.013607	0.2535	0.40287	0.999997	445	2	-0.013607
U2AF1	6	0.088021	0.18853	0.905301	274	2	0.067354	0.25409	0.40351	0.999997	446	2	0.067354
EEF1E1	6	0.78315	0.783	0.999997	1114	0	0.26081	0.25701	0.40619	0.999997	447	2	0.26081
COQ5	6	0.80638	0.80628	0.999997	1154	0	0.14101	0.25789	0.40714	0.999997	448	2	0.14101
PYGM	6	0.83069	0.83088	0.999997	1186	0	-0.066612	0.25821	0.40741	0.999997	449	1	-0.066612
CTRL157	1	0.74171	0.74247	0.999997	1038	0	0.49223	0.25829	0.25794	0.999997	450	0	0.49223
ZC4H2	6	0.72968	0.72898	0.999997	1023	1	0.28495	0.25848	0.40764	0.999997	451	2	0.28495
CTRL122	1	0.74013	0.74082	0.999997	1036	0	0.47845	0.25987	0.25939	0.999997	452	0	0.47845
PRDX6	6	0.84122	0.84132	0.999997	1196	0	0.3482	0.26083	0.40998	0.999997	453	2	0.3482
SRSF4	6	0.94027	0.94081	0.999997	1359	0	0.052012	0.26162	0.4106	0.999997	454	1	0.052012
PRDX5	6	0.85852	0.85901	0.999997	1225	0	0.224	0.26171	0.41069	0.999997	455	2	0.224
CDK5RAP1	6	0.79041	0.79027	0.999997	1125	0	0.26272	0.26502	0.41372	0.999997	456	2	0.26272
MRPS7	6	0.0063442	0.021408	0.393505	84	3	-0.73051	0.26728	0.41572	0.999997	457	1	-0.73051
PFKM	6	0.93603	0.93649	0.999997	1350	0	0.014715	0.26729	0.41574	0.999997	458	2	0.014715
CNOT1	6	0.018823	0.057556	0.598213	135	3	-0.63049	0.26841	0.41695	0.999997	459	1	-0.63049
MRPS26	6	0.63866	0.65147	0.999997	916	1	0.37268	0.26897	0.41749	0.999997	460	2	0.37268
NACA	6	0.6706	0.67605	0.999997	955	1	-0.2646	0.27066	0.41903	0.999997	461	1	-0.2646
CTRL130	1	0.72721	0.72789	0.999997	1018	0	0.45159	0.27279	0.27229	0.999997	462	0	0.45159
CORO1C	6	0.74945	0.74863	0.999997	1055	0	-0.36976	0.27851	0.42646	0.999997	463	2	-0.36976
PGAM2	6	0.92487	0.92533	0.999997	1331	0	0.15484	0.2794	0.42717	0.999997	464	2	0.15484
MYADM	6	0.27849	0.40455	0.999997	549	1	0.26627	0.28072	0.42839	0.999997	465	1	0.26627
CPSF1	6	0.90979	0.91014	0.999997	1305	0	0.38486	0.28127	0.4289	0.999997	466	2	0.38486
AKR7A2	6	0.23404	0.35524	0.999997	482	2	0.075346	0.28183	0.42946	0.999997	467	2	0.075346
FKBP11	6	0.77463	0.77423	0.999997	1097	0	0.227	0.28236	0.42989	0.999997	468	2	0.227
XPO1	6	0.0018209	0.0073712	0.219821	50	3	-0.90277	0.28384	0.43124	0.999997	469	2	-0.90277
CDK6	6	0.12249	0.23416	0.953956	341	2	-0.080783	0.28443	0.43179	0.999997	470	2	-0.080783
CTRL101	1	0.71466	0.71503	0.999997	1002	0	0.428	0.28534	0.28461	0.999997	471	0	0.428
LARP1	6	0.96903	0.96928	0.999997	1410	0	0.34483	0.28626	0.43327	0.999997	472	2	0.34483
PUM1	6	0.88451	0.88501	0.999997	1269	0	0.18044	0.28799	0.43495	0.999997	473	2	0.18044
BTF3	6	0.74573	0.74496	0.999997	1047	0	0.013946	0.28846	0.43543	0.999997	474	1	0.013946
FABP1	6	0.95719	0.95738	0.999997	1388	0	0.11389	0.28859	0.4355	0.999997	475	2	0.11389
SNRPD2	5	0.91385	0.91429	0.999997	1312	0	0.31625	0.29057	0.42049	0.999997	476	1	0.31625
PABPC4	6	0.39221	0.50106	0.999997	706	1	0.012708	0.29066	0.43751	0.999997	477	2	0.012708
ZNF638	6	0.88973	0.89044	0.999997	1277	0	0.24403	0.29215	0.43889	0.999997	478	2	0.24403
PTGR1	6	0.39414	0.50206	0.999997	708	1	0.15366	0.29572	0.44223	0.999997	479	2	0.15366
VASP	6	0.9784	0.97878	0.999997	1433	0	0.17996	0.29602	0.44255	0.999997	480	2	0.17996
LRBA	6	0.14929	0.26258	0.98166	376	2	-0.081517	0.2975	0.44377	0.999997	481	2	-0.081517
VDAC2	6	0.86691	0.86731	0.999997	1244	0	0.1322	0.2978	0.444	0.999997	482	2	0.1322
DDRGK1	6	0.97187	0.97213	0.999997	1420	0	0.12708	0.2987	0.44495	0.999997	483	2	0.12708
MAGOHB	5	0.24791	0.36467	0.999997	498	1	-0.25758	0.29932	0.42978	0.999997	484	1	-0.25758
RPL18A	6	0.33712	0.46874	0.999997	649	1	0.098249	0.30266	0.44865	0.999997	485	2	0.098249
CKB	6	0.2788	0.40485	0.999997	551	2	-0.38569	0.30316	0.44907	0.999997	486	2	-0.38569
CTRL174	1	0.69346	0.69396	0.999997	975	0	0.4018	0.30654	0.30568	0.999997	487	0	0.4018
RPL6	6	0.027241	0.074549	0.661517	155	3	-0.17579	0.30698	0.4526	0.999997	488	2	-0.17579
NAGS	6	0.87578	0.87603	0.999997	1254	0	0.18336	0.30734	0.45301	0.999997	489	2	0.18336
MRPL12	6	0.86038	0.86088	0.999997	1228	0	0.090539	0.30752	0.45321	0.999997	490	1	0.090539
MAGOH	6	0.022844	0.065366	0.622998	146	2	-0.32628	0.30764	0.45331	0.999997	491	2	-0.32628
LUC7L3	6	0.038839	0.097288	0.734774	180	2	0.19805	0.30824	0.45376	0.999997	492	2	0.19805
PA2G4	6	0.054226	0.12672	0.794843	215	3	-0.48436	0.30913	0.45465	0.999997	493	1	-0.48436
PIN4	6	0.33348	0.46464	0.999997	643	1	0.062315	0.31021	0.45563	0.999997	494	1	0.062315
TARDBP	6	0.17536	0.29097	0.999997	412	1	0.42863	0.31092	0.45627	0.999997	495	2	0.42863
RTCA	6	0.3951	0.50254	0.999997	709	1	-0.054782	0.31122	0.4565	0.999997	496	2	-0.054782
PPIB	6	0.28206	0.40832	0.999997	557	2	0.19666	0.31212	0.45731	0.999997	497	2	0.19666
TRIM28	6	0.72671	0.72606	0.999997	1017	1	-0.16841	0.31301	0.45824	0.999997	498	2	-0.16841
EFTUD2	6	0.26347	0.38801	0.999997	522	2	-0.50158	0.31391	0.4591	0.999997	499	2	-0.50158
RBMS1	6	0.91194	0.91227	0.999997	1309	0	0.37455	0.31451	0.45967	0.999997	500	2	0.37455
PFN1	6	0.6901	0.69237	0.999997	971	1	-0.21453	0.31662	0.46166	0.999997	501	1	-0.21453
PDE12	6	0.87187	0.8721	0.999997	1249	0	0.51008	0.3169	0.46185	0.999997	502	2	0.51008
CDV3	6	0.84435	0.84441	0.999997	1200	0	-0.18144	0.31768	0.46255	0.999997	503	1	-0.18144
TMPO	6	0.92563	0.92614	0.999997	1332	0	0.10572	0.31821	0.46309	0.999997	504	1	0.10572
FEN1	6	0.73237	0.73167	0.999997	1027	1	0.024202	0.31928	0.46411	0.999997	505	1	0.024202
CKAP4	6	0.80263	0.80253	0.999997	1145	0	0.44897	0.31929	0.46412	0.999997	506	2	0.44897
ZNF385B	6	0.80508	0.80487	0.999997	1153	0	-0.21135	0.31981	0.46454	0.999997	507	1	-0.21135
RPS20	5	0.046251	0.10773	0.759505	197	3	-0.6794	0.3215	0.45424	0.999997	508	1	-0.6794
PTBP1	6	0.21142	0.3303	0.999997	456	1	-0.22616	0.32168	0.4663	0.999997	509	2	-0.22616
FAM50A	6	0.75425	0.7536	0.999997	1063	0	0.052623	0.32193	0.4665	0.999997	510	1	0.052623
CTRL36	1	0.67761	0.6781	0.999997	963	0	0.35509	0.32239	0.32153	0.999997	511	0	0.35509
BZW2	6	0.76209	0.76174	0.999997	1080	0	-0.053798	0.32258	0.4671	0.999997	512	2	-0.053798
CCAR2	6	0.74643	0.74564	0.999997	1049	0	0.0022456	0.32288	0.46743	0.999997	513	2	0.0022456
MAT2A	6	0.92368	0.9241	0.999997	1327	0	0.45536	0.32347	0.46794	0.999997	514	2	0.45536
PGAM4	6	0.87121	0.87143	0.999997	1248	0	0.24217	0.32351	0.468	0.999997	515	1	0.24217
PSMD12	6	0.28888	0.41572	0.999997	569	2	-0.21153	0.32437	0.4687	0.999997	516	2	-0.21153
SYNCRIP	6	0.96183	0.96187	0.999997	1397	0	0.17945	0.32457	0.46889	0.999997	517	1	0.17945
CBR1	6	0.64271	0.65455	0.999997	923	1	-0.087181	0.32527	0.46937	0.999997	518	2	-0.087181
CTRL69	1	0.67384	0.67446	0.999997	959	0	0.33387	0.32616	0.32529	0.999997	519	0	0.33387
SRBD1	6	0.81425	0.8144	0.999997	1161	0	0.13076	0.3272	0.47142	0.999997	520	1	0.13076
RTN4	6	0.79494	0.79451	0.999997	1134	0	0.34395	0.32736	0.47153	0.999997	521	2	0.34395
ATXN10	6	0.31062	0.43967	0.999997	603	2	0.070435	0.32796	0.47195	0.999997	522	2	0.070435
IDH3B	6	0.62563	0.64118	0.999997	908	1	0.087653	0.32826	0.47222	0.999997	523	2	0.087653
PGM2	6	0.81622	0.81628	0.999997	1164	0	-0.13212	0.32877	0.47262	0.999997	524	1	-0.13212
CTRL87	1	0.67091	0.67182	0.999997	956	0	0.33691	0.32909	0.32814	0.999997	525	0	0.33691
RPL18	6	0.025991	0.071965	0.650731	151	2	-0.44446	0.3293	0.47312	0.999997	526	1	-0.44446
POLDIP3	6	0.96154	0.96161	0.999997	1396	0	0.14764	0.32946	0.47328	0.999997	527	2	0.14764
MID1IP1	6	0.028889	0.077768	0.674574	159	3	-0.59043	0.33035	0.47408	0.999997	528	1	-0.59043
DERPC	6	0.88182	0.88219	0.999997	1263	0	0.4312	0.33066	0.47434	0.999997	529	2	0.4312
HNRNPDL	6	0.69854	0.70005	0.999997	979	1	-0.064078	0.33087	0.4746	0.999997	530	1	-0.064078
ARCN1	6	0.078806	0.17208	0.883973	261	1	-0.15488	0.33191	0.47556	0.999997	531	1	-0.15488
SND1	6	0.62369	0.63987	0.999997	904	1	-0.083834	0.334	0.47755	0.999997	532	2	-0.083834
SERPINB6	6	0.62434	0.64028	0.999997	906	1	0.018412	0.33575	0.47914	0.999997	533	2	0.018412
CTRL123	1	0.66299	0.66412	0.999997	945	0	0.32151	0.33701	0.33647	0.999997	534	0	0.32151
PUF60	6	0.085632	0.18429	0.905301	272	3	-0.47905	0.33712	0.4805	0.999997	535	1	-0.47905
PPP2R1A	6	0.64826	0.65884	0.999997	930	1	0.1908	0.33934	0.48257	0.999997	536	2	0.1908
CTRL96	1	0.66055	0.66164	0.999997	942	0	0.31492	0.33945	0.33899	0.999997	537	0	0.31492
FAM98B	6	0.99588	0.99605	0.999997	1494	0	0.32393	0.33964	0.48288	0.999997	538	2	0.32393
LAP3	6	0.76951	0.76932	0.999997	1089	0	-0.044174	0.34024	0.48345	0.999997	539	2	-0.044174
ELAVL1	6	0.80339	0.80325	0.999997	1148	0	0.45108	0.34114	0.48432	0.999997	540	2	0.45108
SNRPD1	5	0.00086407	0.0035301	0.147311	37	3	-0.76468	0.34136	0.47641	0.999997	541	1	-0.76468
GART	6	0.9703	0.97056	0.999997	1415	0	0.50864	0.34203	0.485	0.999997	542	2	0.50864
EIF3L	6	0.76099	0.76049	0.999997	1079	0	0.023411	0.34263	0.48556	0.999997	543	2	0.023411
PRKDC	6	0.99022	0.9906	0.999997	1472	0	0.38819	0.34323	0.4862	0.999997	544	2	0.38819
PRPF19	5	0.036915	0.088118	0.717411	175	2	-0.0070117	0.34355	0.47881	0.999997	545	2	-0.0070117
HAGH	6	0.15689	0.27113	0.98166	387	2	-0.30273	0.34487	0.48765	0.999997	546	1	-0.30273
FAM120C	6	0.09245	0.19643	0.910787	288	2	-0.17652	0.34563	0.48842	0.999997	547	2	-0.17652
HSPA5	6	1.02e-06	3.21e-06	0.001238	3	4	-2.4169	0.34846	0.49113	0.999997	548	1	-2.4169
MCM2	6	0.58242	0.61125	0.999997	865	1	0.37124	0.34862	0.49128	0.999997	549	2	0.37124
TXNL1	6	0.7169	0.71666	0.999997	1007	1	0.096253	0.35407	0.49639	0.999997	550	1	0.096253
ISCA1	6	0.23628	0.35762	0.999997	484	1	0.24762	0.35431	0.49662	0.999997	551	2	0.24762
SLCO2A1	6	0.76032	0.75973	0.999997	1078	0	0.25787	0.3566	0.49871	0.999997	552	2	0.25787
DNAJA2	6	0.15205	0.26573	0.98166	380	2	-0.31993	0.35671	0.4988	0.999997	553	2	-0.31993
CNOT2	6	0.23202	0.35312	0.999997	479	2	0.14574	0.3582	0.50018	0.999997	554	2	0.14574
CTRL41	1	0.64179	0.64325	0.999997	922	0	0.27209	0.35821	0.35797	0.999997	555	0	0.27209
PCBP1	6	0.75742	0.75676	0.999997	1071	0	0.22165	0.3585	0.50049	0.999997	556	2	0.22165
CTRL28	1	0.64142	0.64295	0.999997	921	0	0.2623	0.35858	0.35833	0.999997	557	0	0.2623
RCC2	6	0.65734	0.66579	0.999997	937	1	0.054652	0.35863	0.50063	0.999997	558	2	0.054652
ARHGAP23	6	0.5058	0.56261	0.999997	798	1	0.18494	0.3588	0.50087	0.999997	559	2	0.18494
HNRNPA2B1	6	0.85723	0.8577	0.999997	1223	0	-0.20591	0.3603	0.50239	0.999997	560	2	-0.20591
CPSF2	6	0.009349	0.030559	0.476287	96	4	-0.73791	0.36115	0.50309	0.999997	561	1	-0.73791
CHTOP	6	0.82835	0.82844	0.999997	1181	0	0.27502	0.3612	0.50316	0.999997	562	2	0.27502
RHOC	6	0.36766	0.48949	0.999997	682	1	-0.096336	0.3618	0.50363	0.999997	563	2	-0.096336
MKI67	6	0.7813	0.78118	0.999997	1109	0	-0.074438	0.36215	0.50397	0.999997	564	1	-0.074438
FMR1	6	0.10385	0.21396	0.937624	311	2	-0.26742	0.36239	0.50417	0.999997	565	2	-0.26742
CPSF6	6	0.91857	0.91906	0.999997	1318	0	0.2637	0.36389	0.50575	0.999997	566	2	0.2637
TPM3	6	0.97403	0.97415	0.999997	1424	0	0.28385	0.36416	0.50602	0.999997	567	2	0.28385
CTRL158	1	0.63582	0.63735	0.999997	915	0	0.25401	0.36418	0.36384	0.999997	568	0	0.25401
NCAPD2	6	0.018	0.055805	0.59016	133	2	-0.43249	0.36516	0.50704	0.999997	569	1	-0.43249
LANCL1	6	0.56445	0.59926	0.999997	854	1	-0.065873	0.36616	0.50799	0.999997	570	1	-0.065873
COQ8A	6	0.97792	0.97823	0.999997	1430	0	0.28745	0.36628	0.50808	0.999997	571	2	0.28745
HSPA1B	6	0.70573	0.70646	0.999997	987	1	0.24349	0.36716	0.50892	0.999997	572	1	0.24349
SRSF2	6	0.97843	0.97881	0.999997	1434	0	0.29642	0.37115	0.51262	0.999997	573	2	0.29642
SRSF6	6	0.9263	0.92686	0.999997	1334	0	0.47994	0.37466	0.51633	0.999997	574	2	0.47994
PSMD13	6	0.9468	0.94729	0.999997	1370	0	0.14101	0.37511	0.5168	0.999997	575	1	0.14101
ANXA7	6	0.11066	0.22106	0.937624	324	2	-0.049862	0.3761	0.51767	0.999997	576	1	-0.049862
PCYT2	6	0.25117	0.37415	0.999997	502	2	-0.049804	0.37645	0.51795	0.999997	577	2	-0.049804
RPS6	6	0.77058	0.7703	0.999997	1091	0	0.15434	0.37675	0.51825	0.999997	578	2	0.15434
EXOSC6	6	0.18527	0.30153	0.999997	424	1	0.21652	0.37824	0.51983	0.999997	579	2	0.21652
H1-3	6	0.79219	0.79184	0.999997	1127	0	0.059267	0.38003	0.52168	0.999997	580	2	0.059267
H1-2	6	0.95514	0.9554	0.999997	1385	0	0.24424	0.38102	0.52279	0.999997	581	1	0.24424
MICALL1	6	0.44522	0.52835	0.999997	750	1	0.038198	0.38123	0.52301	0.999997	582	2	0.038198
TBCB	6	0.97441	0.97455	0.999997	1425	0	0.12847	0.38346	0.52517	0.999997	583	1	0.12847
HMGCS2	6	0.14822	0.26158	0.98166	375	1	0.11812	0.38444	0.52606	0.999997	584	1	0.11812
PURA	6	0.38444	0.49744	0.999997	696	1	0.26561	0.38451	0.5261	0.999997	585	2	0.26561
NDUFA5	6	0.59463	0.61947	0.999997	881	1	-0.28991	0.3857	0.52706	0.999997	586	2	-0.28991
TRAM1	6	0.75697	0.75631	0.999997	1069	0	0.28927	0.386	0.52733	0.999997	587	2	0.28927
STMN2	6	0.23519	0.35657	0.999997	483	2	-0.16788	0.38688	0.52819	0.999997	588	1	-0.16788
APOBEC3F	6	0.65554	0.66441	0.999997	935	1	-0.091957	0.38736	0.52864	0.999997	589	2	-0.091957
DRG1	6	0.92264	0.92322	0.999997	1324	0	0.253	0.38749	0.52883	0.999997	590	2	0.253
SMC2	5	0.31025	0.40984	0.999997	602	1	0.03828	0.3888	0.5177	0.999997	591	1	0.03828
EIF4G3	6	0.035994	0.091651	0.723707	171	2	-0.36283	0.39047	0.53162	0.999997	592	2	-0.36283
EEF1D	6	0.47282	0.54328	0.999997	771	1	0.060242	0.39269	0.53387	0.999997	593	1	0.060242
MTIF2	6	0.98583	0.98621	0.999997	1457	0	0.41506	0.39315	0.53431	0.999997	594	2	0.41506
GFPT1	6	0.98282	0.98314	0.999997	1448	0	0.26689	0.39434	0.53537	0.999997	595	2	0.26689
HBB	6	0.17508	0.29064	0.999997	411	2	-0.021148	0.39464	0.53562	0.999997	596	2	-0.021148
CTRL1	1	0.60535	0.6064	0.999997	891	0	0.18705	0.39465	0.3946	0.999997	597	0	0.18705
SNW1	6	0.0044371	0.015361	0.348791	68	2	-0.098664	0.3951	0.53609	0.999997	598	1	-0.098664
COPA	6	0.00010225	0.00048415	0.043972	17	5	-1.5331	0.39606	0.53691	0.999997	599	1	-1.5331
HKDC1	6	0.84682	0.84695	0.999997	1206	0	-0.097807	0.39613	0.53695	0.999997	600	2	-0.097807
MSI1	6	0.8917	0.89247	0.999997	1279	0	0.21168	0.39791	0.53857	0.999997	601	2	0.21168
CTRL113	1	0.60194	0.60288	0.999997	887	0	0.17584	0.39806	0.39799	0.999997	602	0	0.17584
BPHL	6	0.79611	0.79565	0.999997	1137	0	0.087494	0.3988	0.53958	0.999997	603	2	0.087494
HDAC1	6	0.15138	0.26499	0.98166	378	2	-0.35411	0.3991	0.5399	0.999997	604	2	-0.35411
CTRL136	1	0.60084	0.6018	0.999997	886	0	0.17792	0.39916	0.39896	0.999997	605	0	0.17792
PURB	6	0.81764	0.81771	0.999997	1166	0	0.3301	0.40029	0.54107	0.999997	606	2	0.3301
EIF5	5	0.0010879	0.0043253	0.155538	43	4	-1.2033	0.40143	0.52393	0.999997	607	1	-1.2033
HARS2	6	0.46113	0.53709	0.999997	763	1	0.18082	0.40237	0.54301	0.999997	608	2	0.18082
IDH1	6	0.52735	0.57576	0.999997	817	1	0.35742	0.40356	0.54415	0.999997	609	2	0.35742
APOE	6	0.95055	0.95083	0.999997	1379	0	0.34382	0.40415	0.54475	0.999997	610	2	0.34382
ACTC1	6	0.11114	0.22156	0.937624	325	2	0.11402	0.40475	0.54544	0.999997	611	2	0.11402
MRPL37	6	0.68566	0.68854	0.999997	968	1	0.029304	0.4056	0.54635	0.999997	612	1	0.029304
ALDOC	6	0.78397	0.78378	0.999997	1116	0	0.064147	0.40797	0.54876	0.999997	613	1	0.064147
NOVA1	6	0.22511	0.34563	0.999997	471	1	0.18606	0.40801	0.5488	0.999997	614	2	0.18606
C1QBP	6	0.90183	0.9024	0.999997	1294	0	0.24981	0.40831	0.54917	0.999997	615	2	0.24981
CAPN1	6	0.83235	0.83237	0.999997	1188	0	0.3116	0.4086	0.54946	0.999997	616	2	0.3116
PUM2	6	0.59772	0.62182	0.999997	885	1	-0.0055196	0.4089	0.54972	0.999997	617	2	-0.0055196
CKMT2	6	0.75152	0.7508	0.999997	1057	0	-0.23078	0.40891	0.54973	0.999997	618	1	-0.23078
CTRL129	1	0.59085	0.59152	0.999997	876	0	0.16074	0.40915	0.40887	0.999997	619	0	0.16074
AIMP2	6	0.54659	0.58781	0.999997	839	1	0.13374	0.4092	0.54998	0.999997	620	2	0.13374
ACTR1A	6	0.1436	0.25674	0.98166	367	2	-0.22998	0.40986	0.55081	0.999997	621	1	-0.22998
CTRL10	1	0.59012	0.59084	0.999997	874	0	0.15702	0.40988	0.40966	0.999997	622	0	0.15702
KIF2A	6	0.29245	0.41965	0.999997	575	2	-0.46217	0.4108	0.55187	0.999997	623	1	-0.46217
PEBP1	6	0.98536	0.98581	0.999997	1455	0	0.19589	0.41127	0.55234	0.999997	624	2	0.19589
DNAJC7	6	0.89796	0.89873	0.999997	1290	0	0.05211	0.41157	0.55257	0.999997	625	2	0.05211
LSG1	6	0.23218	0.35328	0.999997	480	2	-0.074663	0.41216	0.55328	0.999997	626	2	-0.074663
IGF2BP3	6	0.78068	0.78055	0.999997	1108	0	0.057488	0.41394	0.55492	0.999997	627	2	0.057488
CTRL94	1	0.58561	0.58626	0.999997	869	0	0.15408	0.41439	0.41395	0.999997	628	0	0.15408
LRRC47	6	0.74852	0.74774	0.999997	1053	0	0.095961	0.41571	0.55664	0.999997	629	2	0.095961
CPOX	6	0.75266	0.75193	0.999997	1060	0	0.15497	0.41601	0.5569	0.999997	630	2	0.15497
GSK3B	6	0.92333	0.92383	0.999997	1326	0	0.25199	0.41829	0.55927	0.999997	631	2	0.25199
DHX15	6	0.033521	0.086611	0.717411	165	3	-0.055734	0.41926	0.56026	0.999997	632	2	-0.055734
HNRNPM	6	0.0025564	0.0095579	0.258902	57	1	-0.14429	0.42015	0.56105	0.999997	633	2	-0.14429
NXF1	6	0.0002775	0.0012024	0.072925	25	3	-0.28255	0.42044	0.56132	0.999997	634	2	-0.28255
AHSG	6	0.55149	0.59081	0.999997	843	1	0.062166	0.42074	0.5616	0.999997	635	2	0.062166
HNRNPC	6	0.97786	0.97817	0.999997	1428	0	0.51356	0.42103	0.56191	0.999997	636	2	0.51356
EIF1AX	3	0.013639	0.030469	0.476287	118	2	-1.1836	0.42202	0.43758	0.999997	637	1	-1.1836
MAGEB2	6	0.66564	0.67211	0.999997	949	1	-0.13309	0.42293	0.56369	0.999997	638	1	-0.13309
HDHD3	6	0.9084	0.90875	0.999997	1302	0	0.090801	0.4231	0.56387	0.999997	639	2	0.090801
EIF2A	6	0.16192	0.27658	0.988422	395	2	-0.22465	0.42369	0.56441	0.999997	640	2	-0.22465
PSMC6	6	0.14618	0.25933	0.98166	371	2	-0.37169	0.42477	0.56557	0.999997	641	1	-0.37169
MGST1	6	0.075621	0.16626	0.876508	256	3	-0.47882	0.42546	0.56644	0.999997	642	2	-0.47882
YBX1	6	0.8215	0.82173	0.999997	1173	0	-0.10195	0.42693	0.56768	0.999997	643	2	-0.10195
TMEM40	6	0.79862	0.79834	0.999997	1140	0	0.24451	0.42752	0.56824	0.999997	644	2	0.24451
PTCD3	6	0.94193	0.9426	0.999997	1362	0	0.29255	0.4287	0.56944	0.999997	645	2	0.29255
PSMB3	6	0.012193	0.038908	0.529503	108	3	-0.63358	0.42899	0.56973	0.999997	646	2	-0.63358
FKBP3	6	0.74433	0.74353	0.999997	1044	0	-0.047674	0.42983	0.57057	0.999997	647	1	-0.047674
SEPTIN10	6	0.19571	0.31303	0.999997	440	2	-0.31723	0.42987	0.57062	0.999997	648	2	-0.31723
SLIRP	6	0.9667	0.96712	0.999997	1404	0	0.46636	0.43017	0.57088	0.999997	649	2	0.46636
KRT13	6	0.31502	0.44451	0.999997	610	1	0.40212	0.43046	0.57113	0.999997	650	2	0.40212
AIMP1	6	0.60418	0.62632	0.999997	890	1	0.068672	0.43105	0.57183	0.999997	651	2	0.068672
CCT4	6	0.34503	0.47741	0.999997	664	2	0.15953	0.43193	0.57286	0.999997	652	2	0.15953
APEX1	6	0.43484	0.52265	0.999997	742	1	-0.074078	0.43223	0.57317	0.999997	653	2	-0.074078
MYOF	6	0.76473	0.7645	0.999997	1084	0	-0.10402	0.4334	0.57431	0.999997	654	2	-0.10402
ATXN2	6	0.94571	0.94622	0.999997	1367	0	0.2025	0.4337	0.57454	0.999997	655	2	0.2025
PNN	6	0.014173	0.044923	0.546153	119	1	-0.092093	0.43399	0.57477	0.999997	656	2	-0.092093
TDRD3	6	0.33087	0.46163	0.999997	638	1	-0.11554	0.43428	0.57497	0.999997	657	2	-0.11554
FMC1	6	0.76364	0.76336	0.999997	1082	0	0.22534	0.43439	0.57509	0.999997	658	1	0.22534
ERH	6	0.013276	0.042307	0.529503	117	2	-0.39702	0.43484	0.57554	0.999997	659	1	-0.39702
BCKDHB	6	0.41315	0.51197	0.999997	722	1	-0.17393	0.43575	0.57645	0.999997	660	1	-0.17393
CTRL197	1	0.56379	0.56423	0.999997	852	0	0.1175	0.43621	0.43546	0.999997	661	0	0.1175
MRPS5	6	0.80206	0.80201	0.999997	1144	0	0.047304	0.43666	0.57742	0.999997	662	1	0.047304
DPYSL3	6	0.67664	0.68136	0.999997	962	1	0.46639	0.43839	0.57907	0.999997	663	2	0.46639
KLC1	6	0.92794	0.9285	0.999997	1338	0	-0.069955	0.43847	0.57911	0.999997	664	1	-0.069955
SPTBN1	6	0.64022	0.65255	0.999997	919	1	-0.085707	0.43937	0.57995	0.999997	665	1	-0.085707
CTRL78	1	0.56026	0.56045	0.999997	848	0	0.10897	0.43974	0.43888	0.999997	666	0	0.10897
S100A4	6	0.75448	0.75379	0.999997	1064	0	0.31325	0.44074	0.5813	0.999997	667	2	0.31325
CTRL74	1	0.55819	0.55834	0.999997	845	0	0.10634	0.44181	0.44098	0.999997	668	0	0.10634
TUBB8	6	0.36666	0.48899	0.999997	679	1	0.3938	0.44249	0.58322	0.999997	669	2	0.3938
MYH10	6	0.22569	0.34621	0.999997	474	2	-0.33289	0.44367	0.58445	0.999997	670	2	-0.33289
UMPS	6	0.85136	0.85156	0.999997	1215	0	0.039489	0.44454	0.58531	0.999997	671	2	0.039489
TUBB2A	6	0.50458	0.56189	0.999997	796	1	0.091832	0.44477	0.58554	0.999997	672	1	0.091832
HSPBP1	6	0.92579	0.92634	0.999997	1333	0	0.19444	0.44483	0.58561	0.999997	673	2	0.19444
RBMXL1	6	0.31271	0.44192	0.999997	607	2	-0.33683	0.44571	0.5863	0.999997	674	2	-0.33683
NUDC	6	0.65943	0.66741	0.999997	941	1	0.029116	0.4463	0.58683	0.999997	675	2	0.029116
ADSS2	6	0.69092	0.69305	0.999997	972	1	0.0078658	0.447	0.58753	0.999997	676	1	0.0078658
ESD	6	0.83301	0.83301	0.999997	1189	0	0.11588	0.44717	0.58769	0.999997	677	2	0.11588
PSME1	6	0.45763	0.53507	0.999997	762	1	-0.20936	0.4479	0.58845	0.999997	678	1	-0.20936
RBM25	6	0.82986	0.82981	0.999997	1184	0	-0.10885	0.44834	0.58888	0.999997	679	2	-0.10885
ALYREF	6	0.96193	0.96197	0.999997	1398	0	0.12403	0.44922	0.58977	0.999997	680	2	0.12403
RBPMS2	6	0.64734	0.65812	0.999997	928	1	-0.11402	0.4498	0.59033	0.999997	681	2	-0.11402
LUC7L2	6	0.78274	0.78257	0.999997	1112	0	0.13614	0.45009	0.59059	0.999997	682	2	0.13614
SNRPA1	6	0.51548	0.56834	0.999997	805	1	0.09977	0.45012	0.59062	0.999997	683	1	0.09977
PLIN3	6	0.30794	0.43671	0.999997	598	2	0.084269	0.4519	0.59238	0.999997	684	1	0.084269
CNN2	6	0.75037	0.74968	0.999997	1056	0	-0.20664	0.45213	0.59265	0.999997	685	2	-0.20664
CTRL34	1	0.54783	0.54758	0.999997	840	0	0.084401	0.45217	0.45158	0.999997	686	0	0.084401
NES	6	0.90506	0.90549	0.999997	1297	0	0.12148	0.45242	0.593	0.999997	687	2	0.12148
SRRM1	6	0.30406	0.43261	0.999997	591	2	0.0209	0.45411	0.59485	0.999997	688	1	0.0209
GOT1	6	0.65584	0.66468	0.999997	936	1	-0.22655	0.45455	0.59536	0.999997	689	1	-0.22655
DTYMK	6	0.26954	0.39476	0.999997	530	1	0.15918	0.45504	0.59584	0.999997	690	2	0.15918
RARS2	6	0.10578	0.21586	0.937624	312	1	0.5258	0.45679	0.59745	0.999997	691	2	0.5258
IDH3G	6	0.60553	0.62724	0.999997	892	1	0.20173	0.45719	0.5979	0.999997	692	1	0.20173
HNRNPAB	6	0.8201	0.82015	0.999997	1170	0	0.34087	0.45737	0.59807	0.999997	693	2	0.34087
ENO3	6	0.74197	0.74123	0.999997	1040	0	-0.28152	0.45763	0.59829	0.999997	694	1	-0.28152
GDI1	6	0.66446	0.67119	0.999997	948	1	0.19606	0.45795	0.59864	0.999997	695	2	0.19606
YTHDF2	6	0.97239	0.97263	0.999997	1421	0	0.43874	0.45824	0.59894	0.999997	696	2	0.43874
PYM1	6	0.61255	0.63208	0.999997	898	1	-0.046559	0.45851	0.59918	0.999997	697	1	-0.046559
KLHL17	6	0.70015	0.70151	0.999997	981	1	-0.11767	0.45938	0.60005	0.999997	698	1	-0.11767
FDFT1	6	0.64084	0.65305	0.999997	920	1	-0.07387	0.45998	0.60067	0.999997	699	2	-0.07387
DTD1	6	0.28294	0.40923	0.999997	559	1	0.2576	0.46026	0.6009	0.999997	700	1	0.2576
PEG10	6	0.19569	0.31302	0.999997	439	1	0.19609	0.4607	0.60133	0.999997	701	1	0.19609
DAP3	6	0.85061	0.85079	0.999997	1213	0	0.18937	0.46085	0.60151	0.999997	702	2	0.18937
CHMP4A	6	0.65854	0.66673	0.999997	940	1	0.065911	0.46201	0.60269	0.999997	703	1	0.065911
YWHAQ	6	0.54318	0.58555	0.999997	837	1	-0.027761	0.46244	0.60303	0.999997	704	1	-0.027761
RO60	6	0.10292	0.2131	0.937624	309	2	-0.21226	0.46418	0.60469	0.999997	705	1	-0.21226
LARP4	6	0.88703	0.88767	0.999997	1272	0	0.046327	0.46433	0.60481	0.999997	706	2	0.046327
CTRL168	1	0.53552	0.53485	0.999997	830	0	0.067019	0.46448	0.46421	0.999997	707	0	0.067019
CTRL171	1	0.53504	0.53439	0.999997	829	0	0.062851	0.46496	0.46465	0.999997	708	0	0.062851
CTRL68	1	0.53467	0.53402	0.999997	828	0	0.064297	0.46533	0.46497	0.999997	709	0	0.064297
ABCE1	6	0.66593	0.67227	0.999997	950	1	0.20557	0.46549	0.60593	0.999997	710	2	0.20557
CCT5	6	0.94781	0.94821	0.999997	1372	0	0.45339	0.46693	0.60726	0.999997	711	2	0.45339
DYNLL1	6	0.015265	0.048168	0.550898	125	3	-0.50287	0.46751	0.60783	0.999997	712	2	-0.50287
ARPC2	6	0.7965	0.79605	0.999997	1138	0	0.34594	0.46867	0.60887	0.999997	713	2	0.34594
PARK7	6	0.54432	0.58627	0.999997	838	1	0.17444	0.46895	0.60916	0.999997	714	2	0.17444
RCOR2	6	0.85106	0.85122	0.999997	1214	0	0.029828	0.46982	0.61	0.999997	715	2	0.029828
CNDP2	6	0.52969	0.57711	0.999997	821	1	0.17128	0.47011	0.61026	0.999997	716	2	0.17128
CTRL84	1	0.52797	0.52753	0.999997	819	0	0.051614	0.47203	0.47156	0.999997	717	0	0.051614
SYMPK	6	0.044837	0.10908	0.762085	193	2	0.20617	0.47282	0.61156	0.999997	718	1	0.20617
CALML3	6	0.52421	0.57384	0.999997	813	1	0.026395	0.47368	0.61186	0.999997	719	1	0.026395
CEP290	6	0.066575	0.14948	0.848518	236	3	-0.3552	0.47837	0.61377	0.999997	720	1	-0.3552
DYNC1H1	6	0.17971	0.29571	0.999997	418	2	-0.043495	0.47879	0.614	0.999997	721	1	-0.043495
MCM6	6	0.72121	0.7208	0.999997	1014	1	-0.22022	0.47964	0.61431	0.999997	722	1	-0.22022
CTRL131	1	0.51919	0.51877	0.999997	809	0	0.031346	0.48081	0.48027	0.999997	723	0	0.031346
XRN2	6	0.0023934	0.0091732	0.252917	55	3	-0.52993	0.48261	0.61558	0.999997	724	1	-0.52993
CTRL120	1	0.51737	0.51693	0.999997	807	0	0.029823	0.48263	0.48221	0.999997	725	0	0.029823
ACTG1	6	0.088439	0.18926	0.905301	277	3	-0.14986	0.48639	0.61719	0.999997	726	1	-0.14986
CTRL112	1	0.51359	0.51328	0.999997	803	0	0.022995	0.48641	0.48616	0.999997	727	0	0.022995
CTRL32	1	0.51176	0.5116	0.999997	801	0	0.018136	0.48824	0.4881	0.999997	728	0	0.018136
CTRL186	1	0.51152	0.51137	0.999997	800	0	0.018388	0.48848	0.48837	0.999997	729	0	0.018388
KRT8	6	0.10689	0.21703	0.937624	315	2	-0.47461	0.48849	0.618	0.999997	730	1	-0.47461
HSPH1	6	0.89375	0.89443	0.999997	1285	0	0.097596	0.49224	0.61946	0.999997	731	1	0.097596
SRP54	6	0.032679	0.084912	0.717411	162	3	-0.54895	0.49432	0.62051	0.999997	732	1	-0.54895
MCM7	6	0.58594	0.61371	0.999997	870	1	-0.10732	0.49473	0.62064	0.999997	733	1	-0.10732
S100P	6	0.97822	0.97859	0.999997	1432	0	0.089203	0.49597	0.62124	0.999997	734	1	0.089203
NSUN4	6	0.70862	0.709	0.999997	992	1	-0.12053	0.4968	0.62157	0.999997	735	1	-0.12053
CTRL83	1	0.50311	0.50299	0.999997	794	0	0.0065273	0.49689	0.49669	0.999997	736	0	0.0065273
CTRL124	1	0.50286	0.50278	0.999997	793	0	0.0061952	0.49714	0.49689	0.999997	737	0	0.0061952
CAND1	6	0.91028	0.91064	0.999997	1306	0	0.072644	0.49762	0.62196	0.999997	738	1	0.072644
LMNB1	6	0.93209	0.93237	0.999997	1344	0	0.04626	0.49844	0.62241	0.999997	739	1	0.04626
TBCE	6	0.043576	0.10661	0.755087	191	2	-0.37296	0.50132	0.62371	0.999997	740	1	-0.37296
CTRL134	1	0.49811	0.49782	0.999997	791	0	-0.0081406	0.50189	0.50181	0.999997	741	0	-0.0081406
SSB	6	0.93829	0.93883	0.999997	1355	0	0.045193	0.50214	0.62409	0.999997	742	1	0.045193
CTRL179	1	0.49665	0.49642	0.999997	790	0	-0.0023677	0.50335	0.50321	0.999997	743	0	-0.0023677
CTRL90	1	0.49653	0.49632	0.999997	789	0	-0.010477	0.50347	0.50332	0.999997	744	0	-0.010477
TPM4	6	0.89532	0.89591	0.999997	1287	0	-0.097394	0.50377	0.6248	0.999997	745	1	-0.097394
ALDH7A1	6	0.43166	0.52114	0.999997	735	1	0.0028621	0.50418	0.62496	0.999997	746	1	0.0028621
CTRL71	1	0.49409	0.49378	0.999997	788	0	-0.017332	0.50591	0.50568	0.999997	747	0	-0.017332
SLC25A11	6	0.95067	0.95095	0.999997	1380	0	0.34711	0.50662	0.62602	0.999997	748	1	0.34711
NME2	6	0.28901	0.41587	0.999997	570	1	-0.35133	0.50743	0.62642	0.999997	749	1	-0.35133
RHOA	6	0.34263	0.47475	0.999997	659	2	0.14665	0.50945	0.62728	0.999997	750	1	0.14665
CTRL19	1	0.48605	0.48587	0.999997	780	0	-0.035794	0.51395	0.5136	0.999997	751	0	-0.035794
CTRL15	1	0.4858	0.48565	0.999997	779	0	-0.034635	0.5142	0.51385	0.999997	752	0	-0.034635
CTRL169	1	0.48495	0.48474	0.999997	778	0	-0.030963	0.51505	0.51464	0.999997	753	0	-0.030963
LGALS3	6	0.21441	0.33373	0.999997	458	1	-0.079557	0.51548	0.63005	0.999997	754	1	-0.079557
EIF4B	6	0.91739	0.91785	0.999997	1314	0	0.3744	0.51747	0.63092	0.999997	755	1	0.3744
METAP1	6	0.0077001	0.025564	0.43374	91	3	-0.81156	0.51827	0.63135	0.999997	756	1	-0.81156
SH3BGRL3	6	0.92704	0.92758	0.999997	1335	0	0.063042	0.52105	0.63251	0.999997	757	1	0.063042
UBA1	5	0.20778	0.31536	0.999997	450	1	0.31304	0.52242	0.58706	0.999997	758	1	0.31304
BIN1	6	0.20974	0.32833	0.999997	453	2	-0.11552	0.52302	0.63355	0.999997	759	1	-0.11552
YBX3	6	0.91656	0.91704	0.999997	1313	0	-0.10391	0.52421	0.63406	0.999997	760	1	-0.10391
OTUB1	6	0.097865	0.2061	0.928246	295	2	-0.19374	0.5246	0.63422	0.999997	761	1	-0.19374
CTRL181	1	0.47459	0.47423	0.999997	772	0	-0.055708	0.52541	0.52532	0.999997	762	0	-0.055708
VIL1	6	0.77229	0.77183	0.999997	1093	0	-0.1044	0.52735	0.63537	0.999997	763	1	-0.1044
SERPINH1	6	0.48723	0.55142	0.999997	781	1	0.11485	0.52852	0.63584	0.999997	764	1	0.11485
CROCC	6	0.29668	0.42437	0.999997	584	1	-0.29389	0.52891	0.63602	0.999997	765	1	-0.29389
FARSB	6	0.82045	0.82061	0.999997	1171	0	-0.086424	0.52969	0.63637	0.999997	766	1	-0.086424
A1CF	6	0.35761	0.48452	0.999997	676	1	-0.2676	0.53047	0.63674	0.999997	767	1	-0.2676
RAVER1	6	0.070158	0.15632	0.872428	241	3	-0.47824	0.53125	0.63705	0.999997	768	1	-0.47824
CTRL27	1	0.46874	0.46808	0.999997	768	0	-0.06741	0.53126	0.53076	0.999997	769	0	-0.06741
C11orf54	6	0.76886	0.76862	0.999997	1088	0	0.017069	0.53164	0.63723	0.999997	770	1	0.017069
PQBP1	6	0.42339	0.51714	0.999997	731	1	-0.23143	0.53397	0.63826	0.999997	771	1	-0.23143
DCD	6	0.14001	0.2529	0.98166	361	2	0.25987	0.53744	0.63983	0.999997	772	1	0.25987
SHFL	6	0.21031	0.32901	0.999997	454	2	-0.20904	0.53974	0.64082	0.999997	773	1	-0.20904
DHX38	6	0.75629	0.75568	0.999997	1067	0	-0.17328	0.54012	0.64102	0.999997	774	1	-0.17328
SMS	6	0.41033	0.51051	0.999997	720	1	-0.14306	0.54127	0.64155	0.999997	775	1	-0.14306
LSM14B	6	0.71227	0.71237	0.999997	996	1	-0.021173	0.54165	0.64178	0.999997	776	1	-0.021173
ALDH3A2	6	0.1666	0.28178	0.989639	403	2	-0.074908	0.54203	0.64191	0.999997	777	1	-0.074908
KRT6A	6	0.081736	0.17758	0.890205	268	2	-0.12843	0.5428	0.64221	0.999997	778	1	-0.12843
FUBP3	6	0.58206	0.61106	0.999997	864	1	0.23857	0.54318	0.64237	0.999997	779	1	0.23857
CTRL163	1	0.45522	0.45478	0.999997	760	0	-0.085288	0.54478	0.54438	0.999997	780	0	-0.085288
CLUH	6	0.37363	0.4923	0.999997	688	1	-0.27874	0.54583	0.6437	0.999997	781	1	-0.27874
KLC2	6	0.94793	0.94838	0.999997	1373	0	0.17876	0.54659	0.64409	0.999997	782	1	0.17876
ARHGAP1	6	0.85476	0.85509	0.999997	1220	0	0.045863	0.54923	0.6452	0.999997	783	1	0.045863
ALKBH1	6	0.97176	0.97196	0.999997	1419	0	0.15305	0.54961	0.64538	0.999997	784	1	0.15305
CTRL195	1	0.45034	0.44961	0.999997	756	0	-0.09596	0.54966	0.54948	0.999997	785	0	-0.09596
CTRL160	1	0.44888	0.44823	0.999997	755	0	-0.097023	0.55112	0.55084	0.999997	786	0	-0.097023
NDUFV2	6	0.59152	0.61746	0.999997	877	1	0.3072	0.55149	0.6462	0.999997	787	1	0.3072
MYL3	6	0.54241	0.58504	0.999997	836	1	-0.072728	0.55261	0.64675	0.999997	788	1	-0.072728
CTRL18	1	0.44559	0.44481	0.999997	751	0	-0.10455	0.55441	0.55432	0.999997	789	0	-0.10455
CTRL12	1	0.44242	0.44162	0.999997	748	0	-0.11069	0.55758	0.55775	0.999997	790	0	-0.11069
DNAJB1	5	0.49269	0.52459	0.999997	786	1	0.048362	0.55934	0.60888	0.999997	791	1	0.048362
SEPTIN11	6	0.37115	0.49097	0.999997	686	1	-0.10529	0.56261	0.65136	0.999997	792	1	-0.10529
CTRL99	1	0.43657	0.43576	0.999997	744	0	-0.11733	0.56343	0.5638	0.999997	793	0	-0.11733
ACP1	6	0.58664	0.6142	0.999997	871	1	-0.121	0.56481	0.65235	0.999997	794	1	-0.121
CTRL95	1	0.4345	0.43366	0.999997	741	0	-0.12212	0.5655	0.56587	0.999997	795	0	-0.12212
CTRL187	1	0.43365	0.43284	0.999997	739	0	-0.12383	0.56635	0.56673	0.999997	796	0	-0.12383
SPAG17	6	0.098028	0.20637	0.928246	296	3	-0.56715	0.56773	0.65376	0.999997	797	1	-0.56715
SRRT	6	0.84986	0.85001	0.999997	1210	0	-0.24286	0.56882	0.65426	0.999997	798	1	-0.24286
SRSF9	6	0.9612	0.96129	0.999997	1395	0	0.14436	0.57027	0.65487	0.999997	799	1	0.14436
TRA2B	6	0.92186	0.92239	0.999997	1323	0	0.30246	0.57171	0.6556	0.999997	800	1	0.30246
PAICS	6	0.14592	0.2591	0.98166	370	2	-0.028876	0.57315	0.6563	0.999997	801	1	-0.028876
ANXA4	6	0.17998	0.29602	0.999997	419	2	0.21117	0.57387	0.65662	0.999997	802	1	0.21117
EIF4H	6	0.51307	0.56695	0.999997	802	1	0.24137	0.57423	0.65685	0.999997	803	1	0.24137
CTRL142	1	0.42573	0.42498	0.999997	732	0	-0.1379	0.57427	0.57474	0.999997	804	0	-0.1379
CSTF1	6	0.27348	0.39911	0.999997	541	2	-0.31937	0.57459	0.65704	0.999997	805	1	-0.31937
ZC3H4	6	0.68872	0.69125	0.999997	970	1	-0.031451	0.57852	0.65888	0.999997	806	1	-0.031451
CTRL59	1	0.42146	0.42097	0.999997	730	0	-0.14396	0.57854	0.57901	0.999997	807	0	-0.14396
NSFL1C	6	0.0043876	0.015182	0.348791	67	3	-0.59787	0.58206	0.66058	0.999997	808	1	-0.59787
CTRL199	1	0.41744	0.41693	0.999997	728	0	-0.14786	0.58256	0.58321	0.999997	809	0	-0.14786
ABHD10	6	0.59566	0.62026	0.999997	882	1	-0.17076	0.58277	0.66093	0.999997	810	1	-0.17076
MAPRE3	6	0.13116	0.24349	0.971436	354	2	-0.20402	0.58348	0.66127	0.999997	811	1	-0.20402
ATXN2L	6	0.32527	0.45549	0.999997	628	2	-0.47225	0.58383	0.66139	0.999997	812	1	-0.47225
INF2	6	0.69638	0.69793	0.999997	977	1	0.2044	0.58524	0.66207	0.999997	813	1	0.2044
CTRL2	1	0.41476	0.41429	0.999997	724	0	-0.15438	0.58524	0.58584	0.999997	814	0	-0.15438
CTRL165	1	0.41269	0.4123	0.999997	721	0	-0.15654	0.58731	0.58799	0.999997	815	0	-0.15654
CTRL200	1	0.41013	0.40987	0.999997	719	0	-0.16124	0.58987	0.59061	0.999997	816	0	-0.16124
CTRL155	1	0.40842	0.408	0.999997	717	0	-0.16499	0.59158	0.59221	0.999997	817	0	-0.16499
QDPR	6	0.71741	0.71711	0.999997	1009	1	0.10836	0.59186	0.6653	0.999997	818	1	0.10836
CTRL188	1	0.40586	0.40535	0.999997	714	0	-0.16905	0.59414	0.59471	0.999997	819	0	-0.16905
NDUFA12	6	0.29777	0.42541	0.999997	586	1	-0.21899	0.59428	0.66652	0.999997	820	1	-0.21899
CALM3	6	0.7522	0.7515	0.999997	1059	0	-0.087269	0.59497	0.66695	0.999997	821	1	-0.087269
CTRL45	1	0.4033	0.40286	0.999997	713	0	-0.17393	0.5967	0.59738	0.999997	822	0	-0.17393
PCMT1	6	0.21116	0.32995	0.999997	455	2	0.085179	0.59772	0.66841	0.999997	823	1	0.085179
BCAM	6	0.35305	0.48243	0.999997	673	1	-0.068674	0.5984	0.66872	0.999997	824	1	-0.068674
NDUFA6	6	0.60989	0.63022	0.999997	895	1	-0.30085	0.59874	0.66888	0.999997	825	1	-0.30085
FYTTD1	6	0.74362	0.74301	0.999997	1042	0	-0.091265	0.60011	0.66956	0.999997	826	1	-0.091265
HNRNPL	6	0.10995	0.22027	0.937624	322	2	-0.33461	0.60079	0.66985	0.999997	827	1	-0.33461
TERF2IP	6	0.93476	0.93519	0.999997	1348	0	-0.10238	0.60283	0.67085	0.999997	828	1	-0.10238
TES	6	0.62077	0.63778	0.999997	902	1	-0.13011	0.60316	0.67107	0.999997	829	1	-0.13011
CKAP5	6	0.10845	0.21873	0.937624	318	1	0.095905	0.60384	0.67152	0.999997	830	1	0.095905
AASDHPPT	6	0.98571	0.98608	0.999997	1456	0	0.21209	0.60418	0.67168	0.999997	831	1	0.21209
APMAP	6	0.80989	0.80976	0.999997	1157	0	-0.23453	0.6062	0.67262	0.999997	832	1	-0.23453
GSTO1	6	0.71639	0.71626	0.999997	1005	1	-0.3681	0.60788	0.67344	0.999997	833	1	-0.3681
CHD1L	6	0.46808	0.54054	0.999997	767	1	0.12415	0.60855	0.67373	0.999997	834	1	0.12415
STIP1	6	0.08858	0.18953	0.905301	278	3	-0.42872	0.60888	0.67387	0.999997	835	1	-0.42872
NAPRT	6	0.82254	0.82279	0.999997	1175	0	0.13477	0.60955	0.67418	0.999997	836	1	0.13477
RCN2	6	0.21627	0.33565	0.999997	461	2	-0.21854	0.61022	0.67444	0.999997	837	1	-0.21854
ACBD3	6	0.87448	0.87479	0.999997	1253	0	-0.04786	0.61089	0.67478	0.999997	838	1	-0.04786
PSMB1	6	0.11441	0.22515	0.938086	331	1	-0.00070574	0.61222	0.67546	0.999997	839	1	-0.00070574
CTRL144	1	0.38709	0.38713	0.999997	700	0	-0.2056	0.61291	0.61385	0.999997	840	0	-0.2056
CAP1	6	0.87041	0.87073	0.999997	1246	0	-0.14289	0.61354	0.67613	0.999997	841	1	-0.14289
STRBP	6	0.28414	0.41058	0.999997	562	2	-0.21943	0.61453	0.67661	0.999997	842	1	-0.21943
YLPM1	6	0.32976	0.46032	0.999997	636	2	-0.46299	0.61486	0.67675	0.999997	843	1	-0.46299
SUGP2	6	0.86123	0.86166	0.999997	1231	0	0.12647	0.61651	0.67755	0.999997	844	1	0.12647
DNAJA1	6	0.98123	0.98159	0.999997	1444	0	0.1738	0.61881	0.67868	0.999997	845	1	0.1738
HADH	6	0.267	0.39177	0.999997	527	2	-0.17495	0.61914	0.6788	0.999997	846	1	-0.17495
GLUL	6	0.29453	0.4219	0.999997	578	2	-0.0073453	0.6211	0.6797	0.999997	847	1	-0.0073453
XPNPEP3	6	0.43937	0.52505	0.999997	746	1	-0.058196	0.62402	0.68119	0.999997	848	1	-0.058196
CACYBP	6	0.65764	0.66602	0.999997	938	1	-0.14431	0.62466	0.68149	0.999997	849	1	-0.14431
ATP5PD	6	0.51986	0.57091	0.999997	810	1	-0.037517	0.62692	0.68275	0.999997	850	1	-0.037517
EPRS1	6	0.0085497	0.028	0.459922	93	3	-0.33752	0.6282	0.6835	0.999997	851	1	-0.33752
RPL5	6	0.89363	0.89434	0.999997	1284	0	-0.010938	0.62852	0.68368	0.999997	852	1	-0.010938
TCP1	6	0.23664	0.35804	0.999997	486	2	-0.48256	0.62916	0.68407	0.999997	853	1	-0.48256
CTRL42	1	0.37052	0.37019	0.999997	685	0	-0.23351	0.62948	0.63081	0.999997	854	0	-0.23351
NDUFAF3	6	0.83383	0.83404	0.999997	1191	0	0.16403	0.62948	0.68426	0.999997	855	1	0.16403
CTRL100	1	0.3693	0.36912	0.999997	683	0	-0.23584	0.6307	0.63213	0.999997	856	0	-0.23584
MOCOS	6	0.7742	0.77376	0.999997	1095	0	0.095124	0.63203	0.68582	0.999997	857	1	0.095124
CTRL76	1	0.36711	0.36688	0.999997	680	0	-0.23964	0.63289	0.63445	0.999997	858	0	-0.23964
CTRL102	1	0.36382	0.36349	0.999997	677	0	-0.24785	0.63618	0.63765	0.999997	859	0	-0.24785
DIS3	6	0.0063138	0.021312	0.393505	83	3	-0.46135	0.63646	0.68844	0.999997	860	1	-0.46135
HBA1	6	0.88903	0.88974	0.999997	1275	0	0.10076	0.6374	0.68901	0.999997	861	1	0.10076
GSTP1	6	0.85967	0.86022	0.999997	1226	0	0.0060634	0.63835	0.68949	0.999997	862	1	0.0060634
CTRL16	1	0.35675	0.35658	0.999997	675	0	-0.25761	0.64325	0.64472	0.999997	863	0	-0.25761
CTRL63	1	0.35614	0.35603	0.999997	674	0	-0.26021	0.64386	0.64531	0.999997	864	0	-0.26021
MTHFD1	6	0.72372	0.7231	0.999997	1015	1	0.19297	0.64487	0.69309	0.999997	865	1	0.19297
LPP	6	0.86066	0.86118	0.999997	1230	0	-0.045506	0.6458	0.69359	0.999997	866	1	-0.045506
ACLY	6	0.69881	0.7003	0.999997	980	1	-0.16058	0.64856	0.69511	0.999997	867	1	-0.16058
PDLIM1	6	0.93521	0.93565	0.999997	1349	0	0.11623	0.64948	0.69564	0.999997	868	1	0.11623
SRP14	6	0.20326	0.32125	0.999997	444	2	-0.15541	0.651	0.69641	0.999997	869	1	-0.15541
MRPL24	6	0.86277	0.8632	0.999997	1237	0	-0.051307	0.65161	0.69671	0.999997	870	1	-0.051307
CTRL167	1	0.34773	0.34745	0.999997	669	0	-0.27797	0.65227	0.65385	0.999997	871	0	-0.27797
ANXA1	6	0.27821	0.40423	0.999997	548	2	-0.30178	0.65282	0.69745	0.999997	872	1	-0.30178
CTRL105	1	0.34676	0.34653	0.999997	667	0	-0.27832	0.65324	0.65468	0.999997	873	0	-0.27832
OXSM	6	0.30585	0.43456	0.999997	595	2	-0.0069463	0.65403	0.69817	0.999997	874	1	-0.0069463
ZC3H7A	6	0.66681	0.67291	0.999997	951	1	-0.221	0.65614	0.6994	0.999997	875	1	-0.221
CTRL25	1	0.34383	0.34385	0.999997	662	0	-0.28364	0.65617	0.65779	0.999997	876	0	-0.28364
CTRL66	1	0.34335	0.34342	0.999997	661	0	-0.28578	0.65665	0.65825	0.999997	877	0	-0.28578
CHCHD2	6	0.62272	0.63921	0.999997	903	1	0.33811	0.65794	0.70041	0.999997	878	1	0.33811
CTRL60	1	0.34018	0.33975	0.999997	655	0	-0.29008	0.65982	0.66098	0.999997	879	0	-0.29008
SRPRB	6	0.34114	0.47326	0.999997	658	2	-0.28603	0.66121	0.70228	0.999997	880	1	-0.28603
RPL12	6	0.95436	0.95469	0.999997	1384	0	0.31708	0.66151	0.70243	0.999997	881	1	0.31708
CTRL143	1	0.3375	0.33701	0.999997	650	0	-0.29746	0.6625	0.66365	0.999997	882	0	-0.29746
ALKBH5	6	0.8839	0.88435	0.999997	1267	0	-0.0058295	0.66329	0.70336	0.999997	883	1	-0.0058295
CTRL89	1	0.33652	0.33588	0.999997	648	0	-0.29776	0.66348	0.66464	0.999997	884	0	-0.29776
LARP4B	6	0.76604	0.76575	0.999997	1086	0	0.044416	0.66476	0.70413	0.999997	885	1	0.044416
PPIA	6	0.60654	0.62793	0.999997	893	1	-0.081334	0.66505	0.70429	0.999997	886	1	-0.081334
CTRL166	1	0.33457	0.33379	0.999997	646	0	-0.30171	0.66543	0.66647	0.999997	887	0	-0.30171
ACAD10	6	0.77015	0.76986	0.999997	1090	0	-0.050256	0.66681	0.70524	0.999997	888	1	-0.050256
EIF2S3	6	2.79e-05	0.00015711	0.01866	12	4	-1.9111	0.6671	0.7054	0.999997	889	1	-1.9111
ZSWIM8	6	0.5054	0.5624	0.999997	797	1	0.34715	0.66798	0.70593	0.999997	890	1	0.34715
CTRL11	1	0.33165	0.33077	0.999997	641	0	-0.30514	0.66835	0.66944	0.999997	891	0	-0.30514
KRT73	6	0.75898	0.75842	0.999997	1075	0	-0.03421	0.66973	0.70694	0.999997	892	1	-0.03421
CTRL58	1	0.33019	0.32935	0.999997	637	0	-0.31202	0.66981	0.67075	0.999997	893	0	-0.31202
CTRL189	1	0.32836	0.32747	0.999997	634	0	-0.31354	0.67164	0.67246	0.999997	894	0	-0.31354
RPL30	6	0.24731	0.36997	0.999997	496	1	0.16863	0.67204	0.7083	0.999997	895	1	0.16863
CTRL141	1	0.32714	0.32617	0.999997	631	0	-0.31706	0.67286	0.67362	0.999997	896	0	-0.31706
HNRNPF	6	0.65824	0.66651	0.999997	939	1	-0.21685	0.67291	0.70876	0.999997	897	1	-0.21685
EIF5B	6	0.091291	0.19447	0.907436	283	3	-0.48503	0.67349	0.70917	0.999997	898	1	-0.48503
STRAP	6	0.93401	0.9344	0.999997	1347	0	0.19427	0.67377	0.70935	0.999997	899	1	0.19427
NCOA5	6	0.61222	0.63185	0.999997	897	1	-0.149	0.67406	0.70949	0.999997	900	1	-0.149
APRT	6	0.34623	0.47866	0.999997	666	2	0.060919	0.67549	0.71045	0.999997	901	1	0.060919
MCM5	6	0.98965	0.99003	0.999997	1471	0	0.30241	0.67607	0.71086	0.999997	902	1	0.30241
CTRL72	1	0.32373	0.32292	0.999997	625	0	-0.32717	0.67627	0.67673	0.999997	903	0	-0.32717
CTRL30	1	0.323	0.32215	0.999997	623	0	-0.32801	0.677	0.67748	0.999997	904	0	-0.32801
CTRL135	1	0.32226	0.32143	0.999997	620	0	-0.32734	0.67774	0.67825	0.999997	905	0	-0.32734
CPNE3	6	0.81533	0.81555	0.999997	1162	0	-0.21509	0.67778	0.71177	0.999997	906	1	-0.21509
SLC25A13	6	0.56225	0.59785	0.999997	850	1	-0.070022	0.67891	0.7125	0.999997	907	1	-0.070022
SF1	6	0.25077	0.37365	0.999997	501	1	0.49374	0.6792	0.71268	0.999997	908	1	0.49374
CTRL117	1	0.32056	0.31977	0.999997	617	0	-0.33162	0.67944	0.67984	0.999997	909	0	-0.33162
CANX	6	0.00027597	0.0011959	0.072925	24	5	-1.139	0.67948	0.71283	0.999997	910	1	-1.139
CTRL21	1	0.31995	0.31912	0.999997	616	0	-0.33645	0.68005	0.68064	0.999997	911	0	-0.33645
MYH14	6	0.76626	0.76593	0.999997	1087	0	0.21085	0.68033	0.71327	0.999997	912	1	0.21085
FIP1L1	6	0.023639	0.067014	0.634787	147	3	-0.51419	0.68061	0.71347	0.999997	913	1	-0.51419
MAP2K2	6	0.69147	0.69354	0.999997	973	1	-0.25954	0.68174	0.71411	0.999997	914	1	-0.25954
RIPOR1	6	0.46331	0.53809	0.999997	764	1	-0.052631	0.6823	0.71439	0.999997	915	1	-0.052631
TECR	6	0.73359	0.73282	0.999997	1028	1	0.13227	0.68287	0.71464	0.999997	916	1	0.13227
CDK1	6	0.0083791	0.027481	0.456244	92	1	-0.34563	0.68343	0.715	0.999997	917	1	-0.34563
CTRL31	1	0.31605	0.31507	0.999997	612	0	-0.34466	0.68395	0.68462	0.999997	918	0	-0.34466
CTRL106	1	0.31581	0.31485	0.999997	611	0	-0.34271	0.68419	0.68485	0.999997	919	0	-0.34271
DPYD	6	0.74079	0.74001	0.999997	1037	0	-0.010635	0.68455	0.71565	0.999997	920	1	-0.010635
DLST	6	0.96071	0.96076	0.999997	1394	0	0.0068918	0.68622	0.71665	0.999997	921	1	0.0068918
CTRL173	1	0.31361	0.31279	0.999997	609	0	-0.34975	0.68639	0.68703	0.999997	922	0	-0.34975
CTRL35	1	0.313	0.31214	0.999997	608	0	-0.3472	0.687	0.68756	0.999997	923	0	-0.3472
EDC3	6	0.71664	0.71648	0.999997	1006	1	-0.4257	0.68844	0.71822	0.999997	924	1	-0.4257
TRIP10	6	0.78151	0.78134	0.999997	1110	0	0.051931	0.68872	0.71838	0.999997	925	1	0.051931
CTRL92	1	0.31105	0.31013	0.999997	604	0	-0.35368	0.68895	0.68942	0.999997	926	0	-0.35368
PELO	6	0.12372	0.23561	0.956225	344	2	-0.15151	0.69229	0.72062	0.999997	927	1	-0.15151
WDR5	6	0.038969	0.097551	0.734774	181	3	-0.58287	0.69257	0.72079	0.999997	928	1	-0.58287
BCLAF1	6	0.041913	0.10335	0.747433	185	3	-0.63738	0.69366	0.72144	0.999997	929	1	-0.63738
TMPRSS2	6	0.10759	0.21775	0.937624	317	2	-0.26821	0.69421	0.72186	0.999997	930	1	-0.26821
CABIN1	6	0.87958	0.87983	0.999997	1261	0	0.070917	0.69502	0.72235	0.999997	931	1	0.070917
RNY1	4	0.01623	0.041294	0.529503	129	1	-0.48629	0.69525	0.69579	0.999997	932	0	-0.48629
HIBCH	6	0.16006	0.27444	0.98315	394	2	-0.50461	0.69556	0.72262	0.999997	933	1	-0.50461
CAPG	6	0.35203	0.48191	0.999997	671	1	-0.036461	0.69665	0.72331	0.999997	934	1	-0.036461
CAT	6	0.87266	0.87284	0.999997	1250	0	0.18557	0.69719	0.72378	0.999997	935	1	0.18557
NAP1L1	6	0.74806	0.7472	0.999997	1052	0	0.15258	0.69934	0.72527	0.999997	936	1	0.15258
RDH11	6	0.33155	0.46239	0.999997	640	2	-0.5076	0.70122	0.72651	0.999997	937	1	-0.5076
EIF2S1	6	0.055568	0.12933	0.798439	220	2	-0.14289	0.70255	0.72744	0.999997	938	1	-0.14289
CTRL109	1	0.29667	0.29626	0.999997	583	0	-0.37909	0.70333	0.70381	0.999997	939	0	-0.37909
MAPK1	6	0.52852	0.57638	0.999997	820	1	-0.051114	0.70335	0.72791	0.999997	940	1	-0.051114
BZW1	6	0.83804	0.83825	0.999997	1194	0	-0.05508	0.70547	0.72924	0.999997	941	1	-0.05508
XRCC5	6	0.15768	0.27191	0.98166	389	2	-0.31839	0.706	0.72954	0.999997	942	1	-0.31839
PSPH	6	0.92316	0.92366	0.999997	1325	0	0.26459	0.70705	0.73014	0.999997	943	1	0.26459
SORD	6	0.59428	0.61918	0.999997	880	1	-0.18386	0.70836	0.73105	0.999997	944	1	-0.18386
CTRL97	1	0.29107	0.29039	0.999997	573	0	-0.39464	0.70893	0.70917	0.999997	945	0	-0.39464
MYH1	6	0.77357	0.77315	0.999997	1094	0	0.028129	0.71045	0.73239	0.999997	946	1	0.028129
GANAB	6	0.9129	0.91332	0.999997	1310	0	0.19313	0.71097	0.7327	0.999997	947	1	0.19313
CTRL132	1	0.28814	0.28759	0.999997	567	0	-0.39106	0.71186	0.71215	0.999997	948	0	-0.39106
PRPF6	6	0.016274	0.051118	0.563755	130	3	-0.6075	0.7133	0.73431	0.999997	949	1	-0.6075
BAG4	6	0.77736	0.77696	0.999997	1103	0	-0.15884	0.71356	0.73445	0.999997	950	1	-0.15884
CTRL22	1	0.28644	0.28574	0.995899	565	0	-0.39407	0.71356	0.714	0.999997	951	0	-0.39407
ZNF438	6	0.43892	0.52475	0.999997	745	1	-0.28034	0.71408	0.73473	0.999997	952	1	-0.28034
MDH1	6	0.91155	0.91192	0.999997	1308	0	-0.040461	0.71459	0.73503	0.999997	953	1	-0.040461
MIPEP	6	0.81154	0.81161	0.999997	1158	0	0.36466	0.71639	0.73629	0.999997	954	1	0.36466
CTRL178	1	0.28351	0.28266	0.989639	561	0	-0.40562	0.71649	0.71695	0.999997	955	0	-0.40562
SEPTIN9	6	0.71356	0.71359	0.999997	1000	1	-0.04384	0.71664	0.73646	0.999997	956	1	-0.04384
CTRL88	1	0.2829	0.28207	0.989639	558	0	-0.41157	0.7171	0.71759	0.999997	957	0	-0.41157
PPP1R7	6	0.71715	0.71686	0.999997	1008	1	-0.037788	0.71715	0.73675	0.999997	958	1	-0.037788
LASP1	6	0.86444	0.86493	0.999997	1239	0	-0.27499	0.71766	0.73708	0.999997	959	1	-0.27499
VTA1	6	0.98052	0.98084	0.999997	1439	0	0.21921	0.71792	0.73724	0.999997	960	1	0.21921
CDK18	6	0.21769	0.33725	0.999997	463	2	-0.11302	0.71817	0.73743	0.999997	961	1	-0.11302
CTRL164	1	0.28168	0.28084	0.989639	556	0	-0.40737	0.71832	0.7188	0.999997	962	0	-0.40737
ACE2	6	0.29959	0.42738	0.999997	589	2	-0.1272	0.72096	0.73931	0.999997	963	1	-0.1272
EPPK1	6	0.84667	0.84678	0.999997	1205	0	-0.24652	0.72172	0.73985	0.999997	964	1	-0.24652
CSTF3	6	0.31021	0.43917	0.999997	601	1	0.15782	0.72247	0.74037	0.999997	965	1	0.15782
GSR	6	0.75719	0.75652	0.999997	1070	0	-0.030257	0.72272	0.74051	0.999997	966	1	-0.030257
MYL1	6	0.40655	0.50842	0.999997	715	1	-0.35957	0.72597	0.74267	0.999997	967	1	-0.35957
CTRL172	1	0.27376	0.27315	0.98166	542	0	-0.42669	0.72624	0.72693	0.999997	968	0	-0.42669
CTRL75	1	0.27303	0.27249	0.98166	538	0	-0.4234	0.72697	0.72765	0.999997	969	0	-0.4234
CRNKL1	6	0.64302	0.65473	0.999997	924	1	0.1428	0.72795	0.74425	0.999997	970	1	0.1428
CTRL149	1	0.27145	0.271	0.98166	535	0	-0.42879	0.72855	0.72918	0.999997	971	0	-0.42879
EIF4A3	6	0.079489	0.17338	0.883973	264	2	-0.070018	0.73139	0.74676	0.999997	972	1	-0.070018
TLN1	6	0.090574	0.19314	0.906422	282	3	-0.19788	0.73188	0.74711	0.999997	973	1	-0.19788
MBNL1	6	0.32886	0.45937	0.999997	635	2	-0.27358	0.73237	0.7475	0.999997	974	1	-0.27358
CTRL49	1	0.26621	0.26591	0.98166	526	0	-0.43562	0.73379	0.73423	0.999997	975	0	-0.43562
UBE2V1	6	0.70415	0.70518	0.999997	985	1	0.39529	0.7348	0.74934	0.999997	976	1	0.39529
CSK	6	0.80376	0.80367	0.999997	1150	0	-0.19085	0.73601	0.75011	0.999997	977	1	-0.19085
AHSA1	6	0.52499	0.57431	0.999997	814	1	-0.18528	0.73649	0.75045	0.999997	978	1	-0.18528
TIPRL	6	0.30287	0.43118	0.999997	590	2	-0.086169	0.73697	0.75076	0.999997	979	1	-0.086169
CTRL116	1	0.26255	0.26205	0.98166	520	0	-0.44678	0.73745	0.73811	0.999997	980	0	-0.44678
CTRL138	1	0.26231	0.26176	0.98166	519	0	-0.44302	0.73769	0.73836	0.999997	981	0	-0.44302
CTRL57	1	0.26194	0.26133	0.98166	518	0	-0.44878	0.73806	0.7387	0.999997	982	0	-0.44878
CTRL133	1	0.26182	0.26121	0.98166	517	0	-0.44628	0.73818	0.73886	0.999997	983	0	-0.44628
KLHL41	6	0.74339	0.74273	0.999997	1041	0	0.1018	0.73912	0.75232	0.999997	984	1	0.1018
PCBP3	6	0.70836	0.70878	0.999997	991	1	0.13857	0.73936	0.75252	0.999997	985	1	0.13857
AKAP8L	6	0.14053	0.25343	0.98166	363	2	-0.36695	0.74008	0.75299	0.999997	986	1	-0.36695
CTRL175	1	0.25975	0.25926	0.98166	513	0	-0.45741	0.74025	0.7409	0.999997	987	0	-0.45741
CTRL52	1	0.25719	0.2566	0.98166	510	0	-0.4604	0.74281	0.74367	0.999997	988	0	-0.4604
PPP1CB	6	0.0057543	0.019562	0.375321	80	4	-0.89326	0.74339	0.75544	0.999997	989	1	-0.89326
BCAT2	6	0.38493	0.49766	0.999997	697	1	-0.10574	0.74362	0.75561	0.999997	990	1	-0.10574
CTSD	6	0.47539	0.54487	0.999997	773	1	-0.16454	0.74409	0.7559	0.999997	991	1	-0.16454
CBR4	6	0.6732	0.67821	0.999997	958	1	0.15968	0.7448	0.75631	0.999997	992	1	0.15968
THRAP3	6	0.24767	0.3704	0.999997	497	2	-0.26527	0.7462	0.75735	0.999997	993	1	-0.26527
CTRL73	1	0.25378	0.25317	0.98166	506	0	-0.46846	0.74622	0.7469	0.999997	994	0	-0.46846
ACTN4	6	0.68483	0.68787	0.999997	966	1	-0.078367	0.7469	0.75785	0.999997	995	1	-0.078367
CTRL107	1	0.25183	0.25125	0.98166	503	0	-0.46924	0.74817	0.74868	0.999997	996	0	-0.46924
POLR2B	6	0.005667	0.019254	0.375321	79	4	-0.81339	0.74922	0.75945	0.999997	997	1	-0.81339
ACTN3	6	0.80433	0.80421	0.999997	1152	0	0.037823	0.75037	0.76039	0.999997	998	1	0.037823
HNRNPA0	6	0.76408	0.76378	0.999997	1083	0	0.079957	0.75243	0.76188	0.999997	999	1	0.079957
DUSP3	6	0.15847	0.27274	0.98166	391	2	-0.24665	0.75266	0.76202	0.999997	1000	1	-0.24665
AKR1B1	6	0.032761	0.085168	0.717411	163	3	-0.63745	0.75312	0.76241	0.999997	1001	1	-0.63745
CTRL108	1	0.24634	0.24591	0.978552	495	0	-0.48049	0.75366	0.75417	0.999997	1002	0	-0.48049
SFN	6	0.58418	0.61242	0.999997	867	1	0.028246	0.75425	0.76326	0.999997	1003	1	0.028246
PAFAH1B3	6	0.89937	0.90001	0.999997	1292	0	-0.08682	0.75493	0.76373	0.999997	1004	1	-0.08682
HNRNPUL2	6	0.32557	0.45595	0.999997	629	2	-0.11398	0.75652	0.76503	0.999997	1005	1	-0.11398
CTRL198	1	0.2422	0.24182	0.967283	493	0	-0.48756	0.7578	0.75837	0.999997	1006	0	-0.48756
UQCRFS1	6	0.77986	0.77968	0.999997	1107	0	0.17461	0.75786	0.76602	0.999997	1007	1	0.17461
CASP14	6	0.49016	0.55293	0.999997	783	1	-0.22237	0.75876	0.7667	0.999997	1008	1	-0.22237
ANP32E	6	0.16458	0.27958	0.989639	399	2	0.028232	0.75921	0.76704	0.999997	1009	1	0.028232
CSDE1	6	0.10853	0.2188	0.937624	319	2	-0.0025991	0.75988	0.76758	0.999997	1010	1	-0.0025991
CTRL81	1	0.24001	0.23959	0.960949	489	0	-0.49426	0.75999	0.76057	0.999997	1011	0	-0.49426
WBP11	6	0.00091235	0.0037225	0.148639	38	4	-1.0648	0.7643	0.77125	0.999997	1012	1	-1.0648
S100A11	6	0.44566	0.52853	0.999997	752	1	-0.17026	0.76473	0.77165	0.999997	1013	1	-0.17026
PYGL	6	0.8208	0.82096	0.999997	1172	0	0.26349	0.76561	0.77231	0.999997	1014	1	0.26349
SEPTIN2	6	0.22197	0.34197	0.999997	465	2	-0.32524	0.76626	0.77279	0.999997	1015	1	-0.32524
TIAL1	6	0.3163	0.44578	0.999997	613	2	-0.35867	0.76713	0.77347	0.999997	1016	1	-0.35867
MSI2	6	0.9087	0.90907	0.999997	1303	0	0.14211	0.76757	0.77389	0.999997	1017	1	0.14211
AHCY	6	0.84279	0.8429	0.999997	1198	0	0.16348	0.76778	0.77405	0.999997	1018	1	0.16348
PRKACB	6	0.098925	0.20801	0.928246	301	3	-0.5756	0.76994	0.77576	0.999997	1019	1	-0.5756
ACTN1	6	0.022085	0.063936	0.61909	142	2	-0.085397	0.77015	0.7759	0.999997	1020	1	-0.085397
MYEF2	6	0.075657	0.16633	0.876508	257	3	-0.36522	0.77058	0.77622	0.999997	1021	1	-0.36522
MYH9	6	0.75764	0.75706	0.999997	1072	0	-0.28143	0.77101	0.77666	0.999997	1022	1	-0.28143
RBMS2	6	0.76495	0.7647	0.999997	1085	0	-0.085522	0.77144	0.77689	0.999997	1023	1	-0.085522
UBE2L3	6	0.61022	0.63041	0.999997	896	1	0.14595	0.77314	0.77817	0.999997	1024	1	0.14595
IMPDH2	6	0.98222	0.98255	0.999997	1447	0	0.17222	0.77399	0.7789	0.999997	1025	1	0.17222
ANXA3	6	0.33874	0.47052	0.999997	652	2	-0.14493	0.7742	0.77906	0.999997	1026	1	-0.14493
CTRL115	1	0.22551	0.22483	0.938086	473	0	-0.51918	0.77449	0.77504	0.999997	1027	0	-0.51918
PTPN1	6	0.65463	0.66368	0.999997	934	1	0.16677	0.77463	0.77946	0.999997	1028	1	0.16677
CTRL110	1	0.22526	0.22456	0.938086	472	0	-0.52196	0.77474	0.7753	0.999997	1029	0	-0.52196
SPATS2L	6	0.86151	0.86195	0.999997	1233	0	0.18609	0.7761	0.78068	0.999997	1030	1	0.18609
SMG1	6	0.078123	0.17086	0.883973	258	1	-0.19665	0.77715	0.78148	0.999997	1031	1	-0.19665
CTRL3	1	0.22258	0.22165	0.937624	467	0	-0.53029	0.77742	0.77814	0.999997	1032	0	-0.53029
DDX23	6	0.70967	0.70992	0.999997	993	1	0.090614	0.77819	0.78239	0.999997	1033	1	0.090614
PSMG1	6	0.27733	0.40328	0.999997	547	2	-0.54309	0.77903	0.7831	0.999997	1034	1	-0.54309
PHPT1	6	0.50377	0.5614	0.999997	795	1	-0.26682	0.77986	0.78386	0.999997	1035	1	-0.26682
FLII	6	0.78781	0.78747	0.999997	1122	0	-0.44312	0.78151	0.78525	0.999997	1036	1	-0.44312
LUC7L	6	0.77526	0.77486	0.999997	1099	0	0.12046	0.78233	0.78592	0.999997	1037	1	0.12046
SET	6	0.046394	0.1119	0.762656	198	3	-0.56441	0.78274	0.78621	0.999997	1038	1	-0.56441
PITRM1	6	0.8684	0.86877	0.999997	1245	0	-0.15811	0.78315	0.78654	0.999997	1039	1	-0.15811
UGDH	6	0.77757	0.77721	0.999997	1104	0	-0.066194	0.78335	0.7867	0.999997	1040	1	-0.066194
ATPAF2	6	0.42107	0.516	0.999997	729	1	0.22675	0.78356	0.78688	0.999997	1041	1	0.22675
DPP4	6	0.51428	0.56764	0.999997	804	1	-0.25593	0.78437	0.78747	0.999997	1042	1	-0.25593
CTRL111	1	0.21417	0.21324	0.937624	457	0	-0.54009	0.78583	0.78662	0.999997	1043	0	-0.54009
FKBP4	6	0.25019	0.37311	0.999997	499	2	-0.14893	0.7866	0.78925	0.999997	1044	1	-0.14893
HUNK	6	0.90013	0.90069	0.999997	1293	0	0.3277	0.78741	0.78995	0.999997	1045	1	0.3277
CEP41	6	0.7708	0.77056	0.999997	1092	0	0.12914	0.78801	0.79041	0.999997	1046	1	0.12914
VAPA	6	0.004238	0.014765	0.348791	65	4	-0.83965	0.78981	0.79206	0.999997	1047	1	-0.83965
TUBA1B	4	0.43213	0.45097	0.999997	737	1	-0.027852	0.79083	0.79191	0.999997	1048	0	-0.027852
NAMPT	6	0.71995	0.71949	0.999997	1012	1	-0.11945	0.7914	0.7934	0.999997	1049	1	-0.11945
RBFOX2	6	0.71792	0.71754	0.999997	1010	1	0.29221	0.7916	0.79356	0.999997	1050	1	0.29221
DAZAP1	6	0.75786	0.75726	0.999997	1073	0	-0.2644	0.7918	0.7937	0.999997	1051	1	-0.2644
PSMD2	6	0.3859	0.49802	0.999997	699	1	0.24079	0.792	0.79385	0.999997	1052	1	0.24079
ANP32B	6	0.93728	0.93777	0.999997	1354	0	-0.10012	0.79219	0.79399	0.999997	1053	1	-0.10012
CTRL9	1	0.20735	0.20664	0.928246	449	0	-0.56461	0.79265	0.7932	0.999997	1054	0	-0.56461
AHNAK	6	0.98832	0.98865	0.999997	1464	0	0.18397	0.79279	0.79447	0.999997	1055	1	0.18397
CTRL29	1	0.20625	0.20544	0.928246	448	0	-0.56838	0.79375	0.79429	0.999997	1056	0	-0.56838
CNN3	6	0.25306	0.37623	0.999997	505	1	-0.20659	0.79514	0.79643	0.999997	1057	1	-0.20659
RAD23B	6	0.53008	0.57733	0.999997	822	1	0.084616	0.79592	0.79711	0.999997	1058	1	0.084616
FXR1	6	0.72746	0.72683	0.999997	1019	1	0.12548	0.79631	0.79752	0.999997	1059	1	0.12548
S100A6	6	0.95162	0.95199	0.999997	1382	0	0.11961	0.79669	0.79787	0.999997	1060	1	0.11961
PSMD7	6	0.65191	0.6615	0.999997	932	1	0.058208	0.79689	0.79805	0.999997	1061	1	0.058208
SYNE2	6	0.67406	0.67894	0.999997	960	1	-0.022783	0.79708	0.79823	0.999997	1062	1	-0.022783
RPS10	6	0.00093906	0.0038507	0.148639	40	3	-1.0546	0.79843	0.79951	0.999997	1063	1	-1.0546
AK1	6	0.26785	0.39272	0.999997	528	1	-0.19903	0.79997	0.80095	0.999997	1064	1	-0.19903
ILF3	6	0.33365	0.46483	0.999997	644	2	0.22552	0.80054	0.80145	0.999997	1065	1	0.22552
CHD2	6	0.22983	0.35075	0.999997	475	1	-0.24069	0.8013	0.8022	0.999997	1066	1	-0.24069
GNB1	6	0.056318	0.13061	0.798439	221	3	-0.21736	0.80282	0.80365	0.999997	1067	1	-0.21736
CUL3	6	0.38542	0.49785	0.999997	698	1	-0.13934	0.8032	0.80396	0.999997	1068	1	-0.13934
MSN	6	0.94941	0.94982	0.999997	1375	0	0.033544	0.80339	0.80412	0.999997	1069	1	0.033544
KIF21A	6	0.52263	0.57283	0.999997	812	1	-0.14957	0.80395	0.80463	0.999997	1070	1	-0.14957
NUFIP2	6	0.37954	0.49506	0.999997	691	1	-0.055905	0.80451	0.80511	0.999997	1071	1	-0.055905
SULT2A1	6	0.84925	0.84935	0.999997	1208	0	-0.05347	0.80582	0.80624	0.999997	1072	1	-0.05347
PTGES2	6	0.15713	0.2714	0.98166	388	1	-0.025463	0.80601	0.80644	0.999997	1073	1	-0.025463
CTRL127	1	0.19382	0.19305	0.906422	436	1	-0.60032	0.80618	0.80661	0.999997	1074	0	-0.60032
MKNK2	6	0.8828	0.88324	0.999997	1265	0	0.24341	0.80657	0.80709	0.999997	1075	1	0.24341
CTRL145	1	0.19333	0.19259	0.906422	435	1	-0.60097	0.80667	0.80706	0.999997	1076	0	-0.60097
UBP1	6	0.38053	0.49562	0.999997	692	1	-0.24616	0.80675	0.80725	0.999997	1077	1	-0.24616
SHMT1	6	0.29483	0.42225	0.999997	579	2	0.16488	0.80731	0.80772	0.999997	1078	1	0.16488
CTRL4	1	0.19248	0.19171	0.906422	434	1	-0.58921	0.80752	0.80791	0.999997	1079	0	-0.58921
CTRL93	1	0.19102	0.19015	0.905301	432	1	-0.60447	0.80898	0.80913	0.999997	1080	0	-0.60447
TUBB2B	3	0.054788	0.096929	0.734774	218	2	-0.74284	0.8094	0.80851	0.999997	1081	0	-0.74284
IQGAP1	6	0.91375	0.9143	0.999997	1311	0	0.022481	0.80971	0.80999	0.999997	1082	1	0.022481
AGL	6	0.099375	0.20871	0.928653	304	3	-0.3706	0.81062	0.8109	0.999997	1083	1	-0.3706
NLN	6	0.46938	0.54122	0.999997	770	1	0.081774	0.81099	0.81131	0.999997	1084	1	0.081774
CTRL23	1	0.18895	0.18819	0.905301	429	1	-0.60762	0.81105	0.81112	0.999997	1085	0	-0.60762
CTRL128	1	0.1887	0.18795	0.905301	428	1	-0.61189	0.8113	0.8114	0.999997	1086	0	-0.61189
ANKS1B	6	0.30436	0.43293	0.999997	593	2	-0.18833	0.81135	0.8117	0.999997	1087	1	-0.18833
CTRL126	1	0.18834	0.18754	0.905301	427	1	-0.62308	0.81166	0.81173	0.999997	1088	0	-0.62308
SARNP	6	0.073585	0.16248	0.876508	251	3	-0.43558	0.81281	0.81308	0.999997	1089	1	-0.43558
DDX5	6	0.38395	0.49728	0.999997	695	1	-0.096403	0.81299	0.81329	0.999997	1090	1	-0.096403
GPKOW	6	0.45234	0.53221	0.999997	757	1	0.12979	0.81317	0.81349	0.999997	1091	1	0.12979
NCL	6	0.25764	0.38143	0.999997	511	1	-0.15894	0.81335	0.8137	0.999997	1092	1	-0.15894
NPEPPS	6	0.14309	0.25621	0.98166	365	2	-0.093881	0.81407	0.81443	0.999997	1093	1	-0.093881
VIRMA	6	0.25995	0.38401	0.999997	514	2	-0.27036	0.81461	0.81497	0.999997	1094	1	-0.27036
MOV10	6	0.16941	0.28478	0.994792	404	2	-0.23667	0.81515	0.81548	0.999997	1095	1	-0.23667
SORBS3	6	0.97293	0.97314	0.999997	1422	0	0.19026	0.8155	0.81582	0.999997	1096	1	0.19026
APOBEC3B	6	0.14955	0.26281	0.98166	377	2	0.087125	0.81568	0.81595	0.999997	1097	1	0.087125
EMD	6	0.75674	0.75613	0.999997	1068	0	-0.17053	0.81586	0.81612	0.999997	1098	1	-0.17053
PFKP	6	0.72071	0.72029	0.999997	1013	1	0.20619	0.81604	0.81626	0.999997	1099	1	0.20619
PSPC1	6	0.74527	0.74448	0.999997	1045	0	0.18187	0.81622	0.81639	0.999997	1100	1	0.18187
ERP44	6	0.078555	0.17173	0.883973	260	3	-0.60315	0.81746	0.81762	0.999997	1101	1	-0.60315
TRMU	6	0.18135	0.29751	0.999997	421	2	-0.17954	0.81817	0.81843	0.999997	1102	1	-0.17954
ALDH9A1	6	0.63489	0.64843	0.999997	914	1	-0.18519	0.81923	0.81949	0.999997	1103	1	-0.18519
SLC25A6	6	0.30428	0.43286	0.999997	592	1	0.01477	0.81958	0.81982	0.999997	1104	1	0.01477
ZC3HAV1	6	0.2701	0.39536	0.999997	533	2	-0.49486	0.81993	0.82011	0.999997	1105	1	-0.49486
VAT1	6	0.78559	0.78525	0.999997	1119	0	-0.28527	0.8201	0.82022	0.999997	1106	1	-0.28527
HGD	6	0.30883	0.43765	0.999997	600	2	-0.41944	0.82028	0.82043	0.999997	1107	1	-0.41944
PRPF40A	6	0.79071	0.79054	0.999997	1126	0	-0.068565	0.82045	0.82067	0.999997	1108	1	-0.068565
BCCIP	6	0.27319	0.39869	0.999997	539	2	-0.12035	0.82063	0.82084	0.999997	1109	1	-0.12035
SF3B1	6	0.18933	0.30613	0.999997	430	2	-0.1685	0.82115	0.82139	0.999997	1110	1	-0.1685
CTRL91	1	0.17883	0.17829	0.890849	417	1	-0.6421	0.82117	0.82119	0.999997	1111	0	-0.6421
MLEC	6	0.00029589	0.001228	0.072925	26	4	-1.0484	0.82219	0.82243	0.999997	1112	1	-1.0484
NCBP3	6	0.9033	0.90383	0.999997	1296	0	0.097668	0.82237	0.82262	0.999997	1113	1	0.097668
CDC42	6	0.37462	0.49284	0.999997	689	1	-0.39501	0.82341	0.82367	0.999997	1114	1	-0.39501
CTRL182	1	0.17615	0.17575	0.885526	415	1	-0.65395	0.82385	0.82386	0.999997	1115	0	-0.65395
SSBP1	6	0.4312	0.52092	0.999997	734	1	0.048169	0.82392	0.82407	0.999997	1116	1	0.048169
ERAL1	6	0.88268	0.88309	0.999997	1264	0	0.37489	0.82409	0.82423	0.999997	1117	1	0.37489
CTRL104	1	0.17566	0.1753	0.885526	413	1	-0.6495	0.82434	0.82441	0.999997	1118	0	-0.6495
PKP1	6	0.81835	0.81853	0.999997	1168	0	0.00055105	0.82461	0.82477	0.999997	1119	0	0.00055105
DBI	6	0.93012	0.93049	0.999997	1340	0	0.30642	0.82495	0.82506	0.999997	1120	0	0.30642
MAPRE1	6	0.77442	0.77397	0.999997	1096	0	0.34727	0.82512	0.8252	0.999997	1121	0	0.34727
SLC9A3R1	6	0.85299	0.85317	0.999997	1216	0	0.30163	0.82563	0.82568	0.999997	1122	0	0.30163
CTRL148	1	0.1742	0.17405	0.883973	410	1	-0.68649	0.8258	0.8259	0.999997	1123	0	-0.68649
SCIN	6	0.082463	0.17896	0.891329	269	3	-0.33593	0.8258	0.8259	0.999997	1124	0	-0.33593
CTRL125	1	0.17384	0.17359	0.883973	408	1	-0.65498	0.82616	0.82625	0.999997	1125	0	-0.65498
CTRL192	1	0.17371	0.17344	0.883973	407	1	-0.64658	0.82629	0.82636	0.999997	1126	0	-0.64658
HNRNPK	6	0.00067184	0.002767	0.125655	34	3	-0.45257	0.82649	0.82657	0.999997	1127	0	-0.45257
DHCR24	6	0.00099758	0.0040688	0.153224	41	4	-0.9297	0.82666	0.8267	0.999997	1128	0	-0.9297
TRIM25	6	0.22226	0.34236	0.999997	466	2	-0.17999	0.82818	0.82825	0.999997	1129	0	-0.17999
CTRL119	1	0.17018	0.16989	0.883973	405	1	-0.66171	0.82982	0.82974	0.999997	1130	0	-0.66171
LSM14A	6	0.87357	0.87377	0.999997	1252	0	-0.10541	0.83002	0.83001	0.999997	1131	0	-0.10541
FAM120A	6	0.0054614	0.018568	0.375321	74	4	-0.76814	0.83086	0.83105	0.999997	1132	0	-0.76814
SMC4	4	0.14688	0.23412	0.953956	372	1	-0.34776	0.83112	0.83205	0.999997	1133	0	-0.34776
TIA1	6	0.7761	0.77572	0.999997	1100	0	0.2533	0.83119	0.8313	0.999997	1134	0	0.2533
HMGB2	6	0.75965	0.75907	0.999997	1076	0	-0.16741	0.83152	0.8316	0.999997	1135	0	-0.16741
NARS1	5	0.053648	0.12275	0.794843	212	1	-0.25799	0.83189	0.83315	0.999997	1136	0	-0.25799
STAU2	6	0.7348	0.73414	0.999997	1031	1	0.094694	0.83218	0.83218	0.999997	1137	0	0.094694
CPSF4	6	0.014859	0.046937	0.550898	121	4	-0.71441	0.83235	0.83237	0.999997	1138	0	-0.71441
RAB14	6	0.14181	0.25477	0.98166	364	2	-0.17811	0.83284	0.83281	0.999997	1139	0	-0.17811
OCLN	6	0.2726	0.39803	0.999997	537	2	-0.1172	0.83317	0.83325	0.999997	1140	0	-0.1172
CTRL153	1	0.16592	0.16579	0.876508	401	1	-0.66702	0.83408	0.83389	0.999997	1141	0	-0.66702
PREP	6	0.70731	0.70784	0.999997	989	1	-0.27815	0.83415	0.83439	0.999997	1142	0	-0.27815
COPG1	6	0.0043773	0.015169	0.348791	66	3	-0.54189	0.8353	0.83546	0.999997	1143	0	-0.54189
MAP4	6	0.79843	0.79815	0.999997	1139	0	-0.29494	0.83546	0.83562	0.999997	1144	0	-0.29494
PRKAR2A	6	0.36716	0.48919	0.999997	681	1	0.045187	0.83595	0.83616	0.999997	1145	0	0.045187
CTRL62	1	0.16323	0.16309	0.876508	398	1	-0.67276	0.83677	0.83666	0.999997	1146	0	-0.67276
GBP1	6	0.072306	0.15998	0.872844	248	3	-0.50998	0.83692	0.83714	0.999997	1147	0	-0.50998
SEC24C	6	0.25592	0.37948	0.999997	508	1	0.076107	0.83708	0.83727	0.999997	1148	0	0.076107
CRYZ	6	0.23231	0.35338	0.999997	481	2	-0.045218	0.83724	0.83745	0.999997	1149	0	-0.045218
TOP1	6	0.19738	0.31491	0.999997	441	2	-0.28944	0.83756	0.83775	0.999997	1150	0	-0.28944
GLUD2	6	0.85838	0.85887	0.999997	1224	0	-0.0088561	0.83868	0.83884	0.999997	1151	0	-0.0088561
ERMP1	6	0.027822	0.075639	0.663563	157	3	-0.50422	0.8398	0.83989	0.999997	1152	0	-0.50422
MRTO4	6	0.0010585	0.0043317	0.155538	42	4	-1.0324	0.83996	0.84011	0.999997	1153	0	-1.0324
FUS	6	0.63299	0.64709	0.999997	911	1	0.073219	0.84059	0.84072	0.999997	1154	0	0.073219
XRCC6	6	0.43211	0.52132	0.999997	736	1	-0.16016	0.84122	0.84132	0.999997	1155	0	-0.16016
PDCD6IP	6	0.98604	0.98641	0.999997	1458	0	0.25097	0.8417	0.84185	0.999997	1156	0	0.25097
CDSN	6	0.32509	0.45537	0.999997	627	1	0.024296	0.84232	0.84252	0.999997	1157	0	0.024296
FLNC	6	0.44028	0.52553	0.999997	747	1	-0.073533	0.84264	0.84276	0.999997	1158	0	-0.073533
METTL15	6	0.61946	0.63685	0.999997	901	1	-0.026232	0.84466	0.84473	0.999997	1159	0	-0.026232
ATP2A1	6	0.58699	0.61444	0.999997	872	1	-0.048102	0.84482	0.84491	0.999997	1160	0	-0.048102
CTRL26	1	0.15507	0.15512	0.871233	384	1	-0.70611	0.84493	0.84494	0.999997	1161	0	-0.70611
LIAS	6	0.12618	0.23829	0.960642	349	2	-0.35023	0.84559	0.8457	0.999997	1162	0	-0.35023
PRDX4	6	0.94118	0.94183	0.999997	1361	0	0.057554	0.84651	0.84661	0.999997	1163	0	0.057554
VIM	6	0.16298	0.27783	0.988422	397	2	-0.43189	0.84682	0.84695	0.999997	1164	0	-0.43189
METAP2	6	0.074584	0.16422	0.876508	253	2	-0.41095	0.84697	0.84711	0.999997	1165	0	-0.41095
HBS1L	6	0.38102	0.49586	0.999997	693	1	0.066761	0.84743	0.84765	0.999997	1166	0	0.066761
MYOM2	6	0.016877	0.053074	0.573046	132	3	-0.71163	0.84804	0.84817	0.999997	1167	0	-0.71163
PPID	6	0.53628	0.58118	0.999997	831	1	0.040584	0.84865	0.84878	0.999997	1168	0	0.040584
AGR2	6	0.25204	0.37505	0.999997	504	2	-0.066809	0.85001	0.85019	0.999997	1169	0	-0.066809
PKP2	6	0.12004	0.23142	0.948985	339	2	-0.35372	0.85106	0.85122	0.999997	1170	0	-0.35372
MSH6	6	0.037891	0.095319	0.734774	178	3	-0.47665	0.85151	0.85168	0.999997	1171	0	-0.47665
VDAC3	6	0.70122	0.70252	0.999997	983	1	-0.17756	0.85165	0.85183	0.999997	1172	0	-0.17756
YWHAH	6	0.38346	0.49702	0.999997	694	1	-0.16711	0.85195	0.85212	0.999997	1173	0	-0.16711
SRP72	6	0.11902	0.23043	0.948739	337	2	-0.21664	0.8524	0.85255	0.999997	1174	0	-0.21664
GPI	6	0.74386	0.74319	0.999997	1043	0	0.014045	0.85329	0.85346	0.999997	1175	0	0.014045
SULT2B1	6	0.70758	0.70808	0.999997	990	1	0.11292	0.85388	0.85417	0.999997	1176	0	0.11292
EBP	6	0.26024	0.38441	0.999997	515	2	-0.42054	0.85461	0.85492	0.999997	1177	0	-0.42054
CTRL51	1	0.14483	0.1454	0.831481	369	1	-0.72932	0.85517	0.85494	0.999997	1178	0	-0.72932
STX7	6	0.89273	0.89348	0.999997	1282	0	0.23629	0.85549	0.8558	0.999997	1179	0	0.23629
CKM	6	0.26553	0.39024	0.999997	523	2	-0.5484	0.8568	0.85721	0.999997	1180	0	-0.5484
OLA1	6	0.70229	0.70353	0.999997	984	1	-0.16146	0.85737	0.85788	0.999997	1181	0	-0.16146
KIF5B	6	0.23115	0.35219	0.999997	477	2	-0.32148	0.85752	0.858	0.999997	1182	0	-0.32148
DNAJC8	6	0.0089833	0.029289	0.471071	94	4	-0.75517	0.85766	0.85815	0.999997	1183	0	-0.75517
AIP	6	0.86052	0.86102	0.999997	1229	0	-0.0088336	0.85781	0.85831	0.999997	1184	0	-0.0088336
SURF4	6	0.0018338	0.0074033	0.219821	52	4	-0.99164	0.85852	0.85901	0.999997	1185	0	-0.99164
PHYHIPL	6	0.38785	0.49905	0.999997	701	1	0.0392	0.85881	0.85931	0.999997	1186	0	0.0392
ALDH1A3	6	0.76232	0.76197	0.999997	1081	0	-0.082707	0.85924	0.85981	0.999997	1187	0	-0.082707
GTF2I	6	0.79939	0.79908	0.999997	1141	0	-0.30026	0.85995	0.86049	0.999997	1188	0	-0.30026
CTRL77	1	0.13898	0.13957	0.816234	360	1	-0.7387	0.86102	0.8612	0.999997	1189	0	-0.7387
STOML2	6	0.29231	0.41951	0.999997	574	1	0.094437	0.86123	0.86166	0.999997	1190	0	0.094437
CTRL103	1	0.13837	0.139	0.816003	359	1	-0.74819	0.86163	0.86176	0.999997	1191	0	-0.74819
DSG1	6	0.54127	0.58432	0.999997	835	1	0.011661	0.86179	0.86224	0.999997	1192	0	0.011661
ZNF749	6	0.51906	0.57049	0.999997	808	1	-0.14895	0.86193	0.8624	0.999997	1193	0	-0.14895
SCCPDH	6	0.054335	0.12696	0.794843	217	3	-0.5042	0.86319	0.86361	0.999997	1194	0	-0.5042
CTRL180	1	0.13642	0.13699	0.807743	358	1	-0.76222	0.86358	0.86374	0.999997	1195	0	-0.76222
GSDMA	6	0.17598	0.29153	0.999997	414	2	-0.29613	0.86402	0.86444	0.999997	1196	0	-0.29613
CTRL55	1	0.13582	0.13645	0.807743	357	1	-0.76602	0.86418	0.86435	0.999997	1197	0	-0.76602
CTRL43	1	0.13484	0.13535	0.806854	356	1	-0.7672	0.86516	0.86526	0.999997	1198	0	-0.7672
ANXA5	6	0.77673	0.77632	0.999997	1102	0	-0.28348	0.86527	0.86567	0.999997	1199	0	-0.28348
REEP6	6	0.91902	0.91947	0.999997	1321	0	-0.15901	0.8654	0.86579	0.999997	1200	0	-0.15901
CLIC4	6	0.71097	0.71109	0.999997	995	1	-0.33123	0.86554	0.86594	0.999997	1201	0	-0.33123
NUDT5	6	0.55856	0.59549	0.999997	846	1	0.14368	0.86609	0.86645	0.999997	1202	0	0.14368
PRKAR1A	6	0.31809	0.44777	0.999997	615	2	-0.1948	0.86623	0.86661	0.999997	1203	0	-0.1948
COPB2	5	0.0024866	0.009109	0.252917	56	3	-0.86335	0.8664	0.86726	0.999997	1204	0	-0.86335
SMG8	6	0.30644	0.43517	0.999997	597	2	-0.53766	0.8665	0.86687	0.999997	1205	0	-0.53766
CLTC	6	0.86221	0.86268	0.999997	1235	0	-0.092159	0.86664	0.86699	0.999997	1206	0	-0.092159
ERP29	6	0.85373	0.85394	0.999997	1218	0	0.0045048	0.86745	0.86787	0.999997	1207	0	0.0045048
ANXA2	6	0.32497	0.45522	0.999997	626	2	-0.25965	0.86772	0.86814	0.999997	1208	0	-0.25965
G6PD	6	0.27585	0.40168	0.999997	544	2	-0.28539	0.86826	0.86869	0.999997	1209	0	-0.28539
CTRL64	1	0.13143	0.13212	0.799981	355	1	-0.78053	0.86857	0.86863	0.999997	1210	0	-0.78053
NRAP	6	0.97946	0.97973	0.999997	1437	0	0.2084	0.86867	0.86905	0.999997	1211	0	0.2084
HNRNPH2	6	0.80357	0.80345	0.999997	1149	0	-0.12861	0.86894	0.86933	0.999997	1212	0	-0.12861
STAU1	6	0.84154	0.84167	0.999997	1197	0	-0.20977	0.86947	0.86987	0.999997	1213	0	-0.20977
CTRL6	1	0.1296	0.13036	0.798439	353	1	-0.78261	0.8704	0.87037	0.999997	1214	0	-0.78261
BCAS2	6	0.29631	0.42396	0.999997	582	2	-0.33507	0.87054	0.87085	0.999997	1215	0	-0.33507
MYOZ1	6	0.65039	0.66045	0.999997	931	1	0.078559	0.87068	0.87097	0.999997	1216	0	0.078559
AP1G1	6	0.21799	0.33762	0.999997	464	2	-0.30118	0.87147	0.87168	0.999997	1217	0	-0.30118
TAF15	6	0.080882	0.17607	0.885526	266	2	-0.39627	0.8716	0.87184	0.999997	1218	0	-0.39627
TACO1	6	0.94983	0.95024	0.999997	1377	0	0.14515	0.87174	0.872	0.999997	1219	0	0.14515
RNY3	5	0.042519	0.10026	0.740703	188	1	0.001697	0.87202	0.87276	0.999997	1220	0	0.001697
PAIP1	6	0.17807	0.2938	0.999997	416	2	-0.086574	0.87213	0.87235	0.999997	1221	0	-0.086574
CTRL151	1	0.12753	0.12818	0.794843	351	1	-0.79559	0.87247	0.87239	0.999997	1222	0	-0.79559
ADH5	6	0.88427	0.88476	0.999997	1268	0	0.18202	0.87253	0.87271	0.999997	1223	0	0.18202
AKR1A1	6	0.74876	0.74795	0.999997	1054	0	0.10775	0.87279	0.87295	0.999997	1224	0	0.10775
CTRL13	1	0.12655	0.12736	0.794843	350	1	-0.80267	0.87345	0.87342	0.999997	1225	0	-0.80267
RBM12B	6	0.94977	0.95016	0.999997	1376	0	-0.090458	0.87383	0.87408	0.999997	1226	0	-0.090458
ATP5F1C	6	0.52696	0.57552	0.999997	816	1	-0.23437	0.87396	0.87423	0.999997	1227	0	-0.23437
CTRL33	1	0.1257	0.12647	0.794843	348	1	-0.78785	0.8743	0.87423	0.999997	1228	0	-0.78785
FABP5	6	0.89193	0.89271	0.999997	1280	0	-0.01726	0.87474	0.875	0.999997	1229	0	-0.01726
ARG1	6	0.58734	0.61464	0.999997	873	1	0.25979	0.87487	0.87513	0.999997	1230	0	0.25979
PDS5A	6	0.78539	0.78505	0.999997	1118	0	0.12039	0.87539	0.87568	0.999997	1231	0	0.12039
KTN1	6	0.86165	0.86208	0.999997	1234	0	-0.098751	0.8759	0.87619	0.999997	1232	0	-0.098751
CTRL190	1	0.12399	0.12484	0.794843	346	1	-0.79714	0.87601	0.87593	0.999997	1233	0	-0.79714
IL36G	6	0.77505	0.77467	0.999997	1098	0	0.19257	0.87603	0.87632	0.999997	1234	0	0.19257
CTRL161	1	0.12363	0.12442	0.794843	343	1	-0.81364	0.87637	0.87633	0.999997	1235	0	-0.81364
DDX3Y	6	0.098626	0.20749	0.928246	300	3	-0.26352	0.8768	0.8771	0.999997	1236	0	-0.26352
CTRL17	1	0.12314	0.12398	0.794843	342	1	-0.79702	0.87686	0.87674	0.999997	1237	0	-0.79702
MTREX	6	0.0094696	0.030848	0.476287	98	2	-0.55243	0.87706	0.87741	0.999997	1238	0	-0.55243
ARMT1	6	0.71304	0.71307	0.999997	998	1	0.14659	0.87731	0.87757	0.999997	1239	0	0.14659
ADAR	6	0.73601	0.73531	0.999997	1033	1	-0.19483	0.87744	0.87772	0.999997	1240	0	-0.19483
ARIH2	6	0.073971	0.16317	0.876508	252	3	-0.52516	0.87769	0.87804	0.999997	1241	0	-0.52516
PRXL2A	6	0.51588	0.56851	0.999997	806	1	-0.085745	0.8782	0.87855	0.999997	1242	0	-0.085745
ACIN1	6	0.75584	0.75517	0.999997	1066	0	-0.32267	0.87845	0.8788	0.999997	1243	0	-0.32267
KIF2C	6	0.61585	0.63442	0.999997	899	1	-0.05671	0.87883	0.87907	0.999997	1244	0	-0.05671
SNRPN	6	0.18437	0.30048	0.999997	423	2	-0.11805	0.87921	0.87945	0.999997	1245	0	-0.11805
KIF13B	6	0.91911	0.91954	0.999997	1322	0	-0.047656	0.87971	0.88001	0.999997	1246	0	-0.047656
LDHB	6	0.12544	0.23757	0.960228	347	2	-0.52021	0.88008	0.8804	0.999997	1247	0	-0.52021
CTRL191	1	0.11961	0.12046	0.788115	338	1	-0.81749	0.88039	0.8804	0.999997	1248	0	-0.81749
BPNT1	6	0.68315	0.68651	0.999997	964	1	-0.10974	0.88071	0.88106	0.999997	1249	0	-0.10974
LMAN2	6	0.058795	0.13519	0.806854	226	3	-0.44834	0.8812	0.88164	0.999997	1250	0	-0.44834
CTRL7	1	0.11839	0.11923	0.783379	336	1	-0.80614	0.88161	0.88177	0.999997	1251	0	-0.80614
CHMP2A	6	0.00082686	0.0033506	0.143702	36	3	-0.73563	0.88256	0.88298	0.999997	1252	0	-0.73563
PDIA4	6	0.15332	0.26704	0.98166	383	2	-0.44283	0.88268	0.88309	0.999997	1253	0	-0.44283
LGALS1	6	0.86664	0.86699	0.999997	1243	0	-0.13471	0.88293	0.88337	0.999997	1254	0	-0.13471
PSMA4	6	0.39606	0.50294	0.999997	710	1	-0.15778	0.88415	0.88461	0.999997	1255	0	-0.15778
RBM47	6	0.62402	0.64009	0.999997	905	1	0.0038541	0.88451	0.88501	0.999997	1256	0	0.0038541
PHGDH	6	0.82649	0.82657	0.999997	1178	0	-0.15967	0.88523	0.88581	0.999997	1257	0	-0.15967
PLEC	6	0.93633	0.93678	0.999997	1351	0	-0.17951	0.88631	0.88693	0.999997	1258	0	-0.17951
PON2	6	0.010725	0.034637	0.509335	101	4	-0.79255	0.88643	0.88703	0.999997	1259	0	-0.79255
CTRL80	1	0.11278	0.11361	0.762656	329	1	-0.82177	0.88722	0.88756	0.999997	1260	0	-0.82177
SNRPE	5	0.628	0.63133	0.999997	910	1	0.17194	0.88735	0.88758	0.999997	1261	0	0.17194
SNX5	6	0.67118	0.67652	0.999997	957	1	0.019164	0.88762	0.88828	0.999997	1262	0	0.019164
IGF2BP1	6	0.94083	0.94149	0.999997	1360	0	0.15044	0.88774	0.88839	0.999997	1263	0	0.15044
CTRL5	1	0.11181	0.11276	0.762656	327	1	-0.83505	0.88819	0.88856	0.999997	1264	0	-0.83505
CTRL39	1	0.11132	0.11222	0.762656	326	1	-0.82418	0.88868	0.88904	0.999997	1265	0	-0.82418
LYPLA2	6	0.34683	0.47936	0.999997	668	2	-0.4239	0.88891	0.8896	0.999997	1266	0	-0.4239
PYCR2	6	0.44342	0.5274	0.999997	749	1	-0.24195	0.8895	0.89024	0.999997	1267	0	-0.24195
CTRL114	1	0.10998	0.111	0.762656	323	1	-0.83109	0.89002	0.89031	0.999997	1268	0	-0.83109
DFFA	6	0.11185	0.22235	0.937984	328	2	-0.41317	0.89101	0.89178	0.999997	1269	0	-0.41317
SRSF12	6	0.60955	0.63001	0.999997	894	1	-0.076786	0.89147	0.89223	0.999997	1270	0	-0.076786
KRT76	6	0.8984	0.89914	0.999997	1291	0	0.14057	0.89158	0.89236	0.999997	1271	0	0.14057
CTRL53	1	0.10742	0.10826	0.759788	316	1	-0.8479	0.89258	0.89302	0.999997	1272	0	-0.8479
DDX39A	6	0.3166	0.44618	0.999997	614	2	-0.41122	0.89261	0.89339	0.999997	1273	0	-0.41122
PDE4A	6	0.6624	0.66971	0.999997	944	1	-0.26609	0.89284	0.89359	0.999997	1274	0	-0.26609
BUB3	6	3.54e-06	2.24e-05	0.005776	6	4	-2.6295	0.89431	0.89495	0.999997	1275	0	-2.6295
GLRX3	6	0.62788	0.64302	0.999997	909	1	-0.25277	0.89498	0.89556	0.999997	1276	0	-0.25277
USP5	6	0.2994	0.42725	0.999997	588	1	-0.033258	0.89554	0.89618	0.999997	1277	0	-0.033258
CTRL38	1	0.1034	0.10408	0.747433	310	1	-0.85895	0.8966	0.89701	0.999997	1278	0	-0.85895
VCL	6	0.89785	0.8986	0.999997	1289	0	0.066566	0.89665	0.89736	0.999997	1279	0	0.066566
ARF3	6	0.93858	0.93909	0.999997	1356	0	-0.017338	0.89676	0.89752	0.999997	1280	0	-0.017338
KPNA4	6	0.059825	0.13707	0.807743	227	3	-0.40577	0.89709	0.89786	0.999997	1281	0	-0.40577
ARL1	6	0.002998	0.01086	0.280116	59	4	-0.95764	0.89764	0.8984	0.999997	1282	0	-0.95764
CTRL44	1	0.10206	0.10276	0.747433	308	1	-0.8545	0.89794	0.89832	0.999997	1283	0	-0.8545
CAPRIN1	6	0.47624	0.54535	0.999997	774	1	-0.48232	0.89796	0.89873	0.999997	1284	0	-0.48232
MMAB	6	0.57781	0.60798	0.999997	861	1	-0.031785	0.89829	0.89904	0.999997	1285	0	-0.031785
SMARCA4	6	0.33515	0.46653	0.999997	647	2	0.099859	0.8997	0.9003	0.999997	1286	0	0.099859
YWHAB	6	0.72771	0.7271	0.999997	1020	1	-0.37685	0.90023	0.90079	0.999997	1287	0	-0.37685
KPNA2	6	0.70042	0.70175	0.999997	982	1	0.00077082	0.90034	0.9009	0.999997	1288	0	0.00077082
RUVBL1	6	0.056429	0.13083	0.798439	222	3	-0.28813	0.90055	0.90104	0.999997	1289	0	-0.28813
CTRL139	1	0.099013	0.099513	0.738695	302	1	-0.88777	0.90099	0.90155	0.999997	1290	0	-0.88777
DDX50	6	0.86347	0.86386	0.999997	1238	0	-0.16281	0.90151	0.9021	0.999997	1291	0	-0.16281
CTRL183	1	0.098282	0.098712	0.736284	298	1	-0.87871	0.90172	0.90219	0.999997	1292	0	-0.87871
CTRL177	1	0.097672	0.098038	0.734812	294	1	-0.88708	0.90233	0.90281	0.999997	1293	0	-0.88708
G3BP2	6	0.71278	0.71287	0.999997	997	1	-0.2843	0.90278	0.90328	0.999997	1294	0	-0.2843
CALU	6	0.00031871	0.001337	0.076458	27	5	-0.88701	0.9034	0.90393	0.999997	1295	0	-0.88701
CAMK2D	6	0.15268	0.26643	0.98166	381	2	-0.42613	0.90361	0.90414	0.999997	1296	0	-0.42613
CHORDC1	6	0.14722	0.26044	0.98166	373	2	-0.34601	0.90475	0.90518	0.999997	1297	0	-0.34601
PABPC1	6	0.27851	0.40455	0.999997	550	2	-0.45917	0.90547	0.90589	0.999997	1298	0	-0.45917
FXR2	6	0.94335	0.94374	0.999997	1364	0	-0.035132	0.90588	0.90625	0.999997	1299	0	-0.035132
ARPC1B	6	0.31181	0.44084	0.999997	606	1	-0.32134	0.90679	0.90714	0.999997	1300	0	-0.32134
JPT2	6	0.8875	0.88818	0.999997	1273	0	0.11295	0.9075	0.90774	0.999997	1301	0	0.11295
CTRL176	1	0.091701	0.09187	0.723707	285	1	-0.90489	0.9083	0.90871	0.999997	1302	0	-0.90489
CA3	6	0.40797	0.50914	0.999997	716	1	-0.18633	0.9086	0.90893	0.999997	1303	0	-0.18633
ANXA6	6	0.64795	0.65862	0.999997	929	1	-0.13208	0.90979	0.91014	0.999997	1304	0	-0.13208
CTRL147	1	0.089264	0.089292	0.717411	281	1	-0.92666	0.91074	0.91102	0.999997	1305	0	-0.92666
RAB5B	6	0.28473	0.41118	0.999997	563	2	-0.26628	0.91077	0.91118	0.999997	1306	0	-0.26628
TXNDC5	6	0.81746	0.81751	0.999997	1165	0	-0.24439	0.91097	0.91136	0.999997	1307	0	-0.24439
CTRL48	1	0.088411	0.088458	0.717411	276	1	-0.90579	0.91159	0.91185	0.999997	1308	0	-0.90579
CTRL67	1	0.088045	0.088163	0.717411	275	1	-0.92039	0.91195	0.91217	0.999997	1309	0	-0.92039
HNRNPH3	6	0.28791	0.41459	0.999997	566	2	-0.11122	0.91213	0.91249	0.999997	1310	0	-0.11122
PCM1	6	0.18547	0.30178	0.999997	425	2	-0.42437	0.91309	0.91352	0.999997	1311	0	-0.42437
KPNB1	6	0.040607	0.10082	0.741278	183	2	-0.33846	0.91526	0.91581	0.999997	1312	0	-0.33846
FGG	6	0.089147	0.19056	0.905301	280	3	-0.42883	0.91573	0.91622	0.999997	1313	0	-0.42883
SPTLC1	6	0.006778	0.0228	0.409337	86	3	-0.81186	0.91601	0.91649	0.999997	1314	0	-0.81186
UBXN1	6	0.81782	0.81791	0.999997	1167	0	-0.099549	0.91766	0.91811	0.999997	1315	0	-0.099549
TSN	6	0.7784	0.77813	0.999997	1105	0	-0.01216	0.91794	0.91841	0.999997	1316	0	-0.01216
SUB1	6	0.048519	0.11563	0.770089	203	3	-0.44066	0.91803	0.91851	0.999997	1317	0	-0.44066
NFXL1	6	0.45543	0.53388	0.999997	761	1	-0.11556	0.91857	0.91906	0.999997	1318	0	-0.11556
CTRL184	1	0.081099	0.08152	0.699257	267	1	-0.99525	0.9189	0.91908	0.999997	1319	0	-0.99525
DSC3	6	0.028358	0.076768	0.669659	158	3	-0.55684	0.91893	0.91935	0.999997	1320	0	-0.55684
RPL23A	6	0.29691	0.42462	0.999997	585	2	-0.067316	0.91902	0.91947	0.999997	1321	0	-0.067316
TPM1	6	0.93677	0.93715	0.999997	1352	0	-0.058871	0.91947	0.9199	0.999997	1322	0	-0.058871
MYH2	6	0.79279	0.7924	0.999997	1129	0	-0.18231	0.92045	0.92099	0.999997	1323	0	-0.18231
PGK2	6	0.26965	0.39489	0.999997	531	2	-0.13718	0.92098	0.92156	0.999997	1324	0	-0.13718
LDHC	6	0.33191	0.46273	0.999997	642	1	0.033802	0.92133	0.92192	0.999997	1325	0	0.033802
SEPTIN6	6	0.25058	0.37355	0.999997	500	2	-0.18069	0.92342	0.92391	0.999997	1326	0	-0.18069
RAB5C	6	0.81407	0.81424	0.999997	1160	0	0.075152	0.92351	0.92397	0.999997	1327	0	0.075152
NIPSNAP2	6	0.10877	0.21901	0.937624	320	2	-0.15644	0.9247	0.92517	0.999997	1328	0	-0.15644
DBN1	6	0.071924	0.15929	0.872428	246	3	-0.57494	0.92495	0.92544	0.999997	1329	0	-0.57494
YTHDC1	6	0.012207	0.038959	0.529503	109	4	-0.65772	0.92579	0.92634	0.999997	1330	0	-0.65772
RAB1A	6	0.048724	0.11599	0.770089	204	3	-0.46467	0.92679	0.92736	0.999997	1331	0	-0.46467
CTRL159	1	0.072325	0.072491	0.650731	249	1	-1.0193	0.92767	0.92766	0.999997	1332	0	-1.0193
KIF1B	6	0.27083	0.39615	0.999997	534	2	-0.24344	0.9277	0.92831	0.999997	1333	0	-0.24344
IPO5	6	0.27961	0.40558	0.999997	553	2	-0.28244	0.9286	0.92912	0.999997	1334	0	-0.28244
HSD17B4	6	0.20551	0.32383	0.999997	446	2	-0.18067	0.92868	0.92917	0.999997	1335	0	-0.18067
CTRL8	1	0.070985	0.071195	0.650448	244	1	-1.0129	0.92902	0.92889	0.999997	1336	0	-1.0129
POR	6	0.85343	0.85365	0.999997	1217	0	-0.22698	0.92908	0.92955	0.999997	1337	0	-0.22698
CTRL150	1	0.070497	0.070676	0.649546	242	1	-1.0261	0.9295	0.92944	0.999997	1338	0	-1.0261
RAB6D	6	0.068677	0.15338	0.867461	238	3	-0.45064	0.9298	0.93018	0.999997	1339	0	-0.45064
PPP1CC	6	0.58136	0.61054	0.999997	863	1	-0.055429	0.9302	0.93055	0.999997	1340	0	-0.055429
CTRL70	1	0.0694	0.069464	0.64223	239	1	-0.99926	0.9306	0.93046	0.999997	1341	0	-0.99926
CTRL196	1	0.068426	0.068464	0.636795	237	1	-1.0806	0.93157	0.93142	0.999997	1342	0	-1.0806
DPYSL2	6	0.29559	0.42323	0.999997	580	1	-0.05869	0.93193	0.93224	0.999997	1343	0	-0.05869
RBM12	6	0.7864	0.78607	0.999997	1120	0	-0.18465	0.93201	0.93232	0.999997	1344	0	-0.18465
BDH2	6	0.094923	0.20093	0.928246	289	3	-0.54858	0.93217	0.93246	0.999997	1345	0	-0.54858
CLIC1	6	0.33125	0.4621	0.999997	639	2	-0.43602	0.9334	0.93371	0.999997	1346	0	-0.43602
MAP1B	6	0.77965	0.77944	0.999997	1106	0	0.017754	0.93461	0.93507	0.999997	1347	0	0.017754
SCAF8	6	0.79396	0.79351	0.999997	1132	0	-0.21591	0.93476	0.93519	0.999997	1348	0	-0.21591
CTRL40	1	0.064526	0.064789	0.621333	234	1	-1.0538	0.93547	0.93517	0.999997	1349	0	-1.0538
UBE2K	6	0.27999	0.406	0.999997	554	2	-0.5309	0.93603	0.93649	0.999997	1350	0	-0.5309
USO1	6	0.0055117	0.018728	0.375321	76	4	-0.73409	0.93611	0.93656	0.999997	1351	0	-0.73409
GIPC1	6	0.9074	0.90766	0.999997	1298	0	-0.0052031	0.93728	0.93777	0.999997	1352	0	-0.0052031
FLNA	6	0.047327	0.11352	0.762656	201	2	-0.28714	0.93786	0.93836	0.999997	1353	0	-0.28714
SF3A1	6	0.034917	0.089638	0.717411	167	2	-0.55757	0.93793	0.93843	0.999997	1354	0	-0.55757
USP14	6	0.0889	0.19012	0.905301	279	2	-0.025246	0.939	0.93948	0.999997	1355	0	-0.025246
CTRL118	1	0.060748	0.061121	0.606721	228	1	-1.0634	0.93925	0.93897	0.999997	1356	0	-1.0634
RBM26	6	0.42753	0.51907	0.999997	733	1	-0.44598	0.93957	0.94002	0.999997	1357	0	-0.44598
UBAP2L	6	0.0036237	0.01279	0.313453	63	4	-0.90482	0.93964	0.94007	0.999997	1358	0	-0.90482
MYRFL	6	0.062855	0.14286	0.82302	232	3	-0.61441	0.93971	0.94015	0.999997	1359	0	-0.61441
PSAT1	6	0.009725	0.031566	0.479276	99	4	-0.7122	0.93992	0.94042	0.999997	1360	0	-0.7122
CPSF7	6	0.24069	0.36261	0.999997	492	2	-0.22845	0.94048	0.94107	0.999997	1361	0	-0.22845
YTHDF3	6	0.79259	0.79222	0.999997	1128	0	-0.15351	0.94083	0.94149	0.999997	1362	0	-0.15351
RPL28	6	0.33904	0.4709	0.999997	653	2	-0.026984	0.94124	0.94191	0.999997	1363	0	-0.026984
TGM2	6	0.84544	0.84554	0.999997	1203	0	-0.27892	0.94145	0.94212	0.999997	1364	0	-0.27892
ESYT1	6	0.39941	0.50461	0.999997	711	1	-0.35185	0.94186	0.94255	0.999997	1365	0	-0.35185
CDK11A	6	0.14051	0.25343	0.98166	362	2	-0.41886	0.94207	0.94271	0.999997	1366	0	-0.41886
CDC40	6	0.41689	0.51395	0.999997	727	1	0.02224	0.94281	0.94337	0.999997	1367	0	0.02224
PLRG1	5	0.0094087	0.028571	0.464356	97	2	-0.21519	0.94322	0.944	0.999997	1368	0	-0.21519
KIAA1210	6	0.3272	0.4578	0.999997	632	1	0.057348	0.94362	0.94405	0.999997	1369	0	0.057348
GOLPH3	6	0.31152	0.44059	0.999997	605	2	-0.11643	0.94395	0.9444	0.999997	1370	0	-0.11643
CTRL98	1	0.05429	0.054433	0.579618	216	1	-1.0866	0.94571	0.94531	0.999997	1371	0	-1.0866
CTRL14	1	0.053802	0.054042	0.579449	213	1	-1.117	0.9462	0.94584	0.999997	1372	0	-1.117
PLIN2	6	0.39076	0.50037	0.999997	704	1	-0.15873	0.94699	0.94748	0.999997	1373	0	-0.15873
KHDRBS1	6	0.64672	0.65767	0.999997	927	1	-0.18771	0.94749	0.94789	0.999997	1374	0	-0.18771
HSP90AA1	6	0.29572	0.42335	0.999997	581	2	-0.30685	0.94781	0.94821	0.999997	1375	0	-0.30685
CTRL79	1	0.051974	0.052266	0.568296	210	1	-1.1368	0.94803	0.94768	0.999997	1376	0	-1.1368
RAB5A	6	0.63362	0.64747	0.999997	913	1	-0.076075	0.94812	0.94852	0.999997	1377	0	-0.076075
RBBP7	6	0.036616	0.092838	0.727622	174	2	-0.44474	0.94861	0.94895	0.999997	1378	0	-0.44474
CTSL	6	0.20383	0.32189	0.999997	445	2	-0.39578	0.94904	0.94949	0.999997	1379	0	-0.39578
NAPA	6	0.026126	0.07226	0.650731	152	2	-0.19371	0.94941	0.94982	0.999997	1380	0	-0.19371
ACAT2	6	0.27703	0.40296	0.999997	546	2	-0.24262	0.94959	0.94997	0.999997	1381	0	-0.24262
CTRL86	1	0.050024	0.050444	0.562255	208	1	-1.1333	0.94998	0.94977	0.999997	1382	0	-1.1333
DSC1	6	0.049342	0.11722	0.773483	206	3	-0.53044	0.95019	0.95049	0.999997	1383	0	-0.53044
CTRL185	1	0.049537	0.04997	0.562255	207	1	-1.1798	0.95046	0.95024	0.999997	1384	0	-1.1798
RAB8A	6	0.23144	0.35248	0.999997	478	2	-0.33159	0.95061	0.95091	0.999997	1385	0	-0.33159
AGO1	6	0.2791	0.4051	0.999997	552	2	0.039752	0.95091	0.95119	0.999997	1386	0	0.039752
CPA4	6	0.70652	0.7071	0.999997	988	1	-0.27084	0.95109	0.95138	0.999997	1387	0	-0.27084
AKAP8	6	0.038987	0.097557	0.734774	182	3	-0.47513	0.95208	0.95241	0.999997	1388	0	-0.47513
CTRL47	1	0.047709	0.047976	0.550898	202	1	-1.1796	0.95229	0.95209	0.999997	1389	0	-1.1796
EIF3E	6	0.082895	0.17963	0.891805	270	1	-0.062724	0.95278	0.95312	0.999997	1390	0	-0.062724
AGO2	6	0.03553	0.090779	0.722492	170	3	-0.54857	0.95346	0.95377	0.999997	1391	0	-0.54857
CTRL170	1	0.04649	0.046635	0.550898	199	1	-1.1803	0.95351	0.9532	0.999997	1392	0	-1.1803
SRRM2	6	0.26083	0.38514	0.999997	516	2	-0.32887	0.95403	0.9544	0.999997	1393	0	-0.32887
TMEM33	6	0.20841	0.32679	0.999997	451	1	-0.0054058	0.95481	0.95512	0.999997	1394	0	-0.0054058
CELF1	6	0.019905	0.059614	0.606387	137	3	-0.52821	0.95486	0.95517	0.999997	1395	0	-0.52821
NQO1	6	0.87782	0.87818	0.999997	1258	0	-0.2017	0.95525	0.95549	0.999997	1396	0	-0.2017
ALDH1A1	6	0.0006916	0.0028889	0.12744	35	4	-0.99847	0.95585	0.95608	0.999997	1397	0	-0.99847
PRDX2	6	0.22393	0.3442	0.999997	470	1	-0.092783	0.95607	0.95628	0.999997	1398	0	-0.092783
CTRL65	1	0.043688	0.043801	0.536736	192	1	-1.2331	0.95631	0.95613	0.999997	1399	0	-1.2331
PTBP3	6	0.57279	0.60471	0.999997	856	1	-0.43026	0.95698	0.95712	0.999997	1400	0	-0.43026
MTTP	6	0.34538	0.47774	0.999997	665	1	-0.038005	0.95703	0.95721	0.999997	1401	0	-0.038005
CTRL24	1	0.042835	0.042942	0.530416	189	1	-1.2181	0.95717	0.95705	0.999997	1402	0	-1.2181
CTRL82	1	0.042469	0.042525	0.529503	187	1	-1.2624	0.95753	0.9574	0.999997	1403	0	-1.2624
TGM3	6	0.8485	0.84863	0.999997	1207	0	-0.22242	0.95803	0.95824	0.999997	1404	0	-0.22242
HACD3	6	0.14373	0.25684	0.98166	368	1	0.0039355	0.9586	0.95878	0.999997	1405	0	0.0039355
BCAP31	6	0.73888	0.73809	0.999997	1035	1	-0.10681	0.95916	0.95939	0.999997	1406	0	-0.10681
RPS26	6	0.0092991	0.030309	0.476287	95	2	-0.40017	0.95947	0.9597	0.999997	1407	0	-0.40017
VDAC1	6	0.159	0.27336	0.98166	392	2	-0.29238	0.95977	0.95994	0.999997	1408	0	-0.29238
ZFR	6	0.024003	0.06779	0.636795	148	3	-0.53791	0.96032	0.9604	0.999997	1409	0	-0.53791
ZC3H15	6	0.44834	0.52987	0.999997	753	1	-0.47408	0.96037	0.96043	0.999997	1410	0	-0.47408
BAZ1A	6	0.065242	0.14713	0.838241	235	3	-0.50787	0.96047	0.96051	0.999997	1411	0	-0.50787
RAB7A	6	0.095805	0.2025	0.928246	291	3	-0.37501	0.96096	0.96098	0.999997	1412	0	-0.37501
UBAP2	6	0.28859	0.41535	0.999997	568	2	-0.14517	0.96101	0.96104	0.999997	1413	0	-0.14517
ABAT	6	0.37015	0.49054	0.999997	684	1	-0.44282	0.96145	0.9615	0.999997	1414	0	-0.44282
RAB11A	6	0.78499	0.78462	0.999997	1117	0	-0.0021841	0.96183	0.96187	0.999997	1415	0	-0.0021841
DDX19A	6	0.57387	0.6054	0.999997	857	1	-0.35677	0.96212	0.96216	0.999997	1416	0	-0.35677
COASY	6	0.00022045	0.0009715	0.071429	21	4	-1.302	0.96274	0.96279	0.999997	1417	0	-1.302
CSRP2	6	0.32772	0.45833	0.999997	633	1	-0.077473	0.96288	0.96296	0.999997	1418	0	-0.077473
BLVRA	6	0.90299	0.90355	0.999997	1295	0	-0.027671	0.96302	0.96306	0.999997	1419	0	-0.027671
CTRL140	1	0.036254	0.036048	0.520172	173	1	-1.2939	0.96375	0.96384	0.999997	1420	0	-1.2939
PTGES3	6	0.66062	0.6683	0.999997	943	1	-0.33768	0.96376	0.96404	0.999997	1421	0	-0.33768
TWF1	6	0.098093	0.20647	0.928246	297	2	-0.38007	0.9639	0.96419	0.999997	1422	0	-0.38007
GCLM	6	0.29886	0.4267	0.999997	587	1	-0.23764	0.96404	0.96434	0.999997	1423	0	-0.23764
SCFD1	6	0.00036553	0.0014717	0.081153	29	3	-0.941	0.96445	0.96475	0.999997	1424	0	-0.941
ELP1	6	0.19141	0.30845	0.999997	433	1	-0.30867	0.96449	0.96479	0.999997	1425	0	-0.30867
CSTF2	6	0.069533	0.15517	0.871233	240	3	-0.5874	0.96503	0.96525	0.999997	1426	0	-0.5874
NPM1	6	0.29334	0.42063	0.999997	576	2	-0.28222	0.96566	0.96584	0.999997	1427	0	-0.28222
SLTM	6	0.033008	0.085585	0.717411	164	3	-0.65819	0.96583	0.96603	0.999997	1428	0	-0.65819
HSPA2	6	0.53358	0.57954	0.999997	827	1	-0.21857	0.96635	0.96671	0.999997	1429	0	-0.21857
EEF1B2	6	0.23029	0.35123	0.999997	476	2	-0.33879	0.96657	0.96696	0.999997	1430	0	-0.33879
BLVRB	6	0.097582	0.20558	0.928246	293	3	-0.24882	0.96691	0.96733	0.999997	1431	0	-0.24882
CTRL137	1	0.032598	0.032541	0.483102	161	1	-1.3336	0.9674	0.96752	0.999997	1432	0	-1.3336
MLF2	6	0.10665	0.21681	0.937624	314	2	-0.31512	0.96751	0.96797	0.999997	1433	0	-0.31512
PRPS2	6	0.34443	0.47666	0.999997	663	2	-0.21962	0.96784	0.96821	0.999997	1434	0	-0.21962
RNY5	6	0.75335	0.75267	0.999997	1061	0	-0.024507	0.96797	0.96834	0.999997	1435	0	-0.024507
AP3M1	6	0.024253	0.068284	0.636795	149	3	-0.51861	0.96826	0.96856	0.999997	1436	0	-0.51861
KHSRP	6	0.7455	0.74472	0.999997	1046	0	-0.36847	0.96883	0.96911	0.999997	1437	0	-0.36847
DIABLO	6	0.52774	0.57602	0.999997	818	1	-0.16435	0.96915	0.96942	0.999997	1438	0	-0.16435
CCDC47	6	0.0033866	0.012001	0.303766	61	4	-0.91598	0.96931	0.9696	0.999997	1439	0	-0.91598
STAT1	6	0.2375	0.35906	0.999997	487	2	-0.32218	0.96979	0.96999	0.999997	1440	0	-0.32218
SMG6	6	0.013076	0.041781	0.529503	115	2	-0.20109	0.9705	0.97079	0.999997	1441	0	-0.20109
RNMT	6	0.0455	0.1102	0.762656	195	3	-0.45533	0.97142	0.97165	0.999997	1442	0	-0.45533
NAP1L4	6	0.048827	0.11621	0.770089	205	3	-0.43972	0.97239	0.97263	0.999997	1443	0	-0.43972
CTRL146	1	0.026505	0.026429	0.443554	153	1	-1.4492	0.9735	0.97337	0.999997	1444	0	-1.4492
PDCD6	6	0.49266	0.55439	0.999997	785	1	0.018361	0.97368	0.97381	0.999997	1445	0	0.018361
FLNB	6	0.87331	0.87346	0.999997	1251	0	-0.2828	0.97459	0.97474	0.999997	1446	0	-0.2828
G3BP1	6	0.016563	0.052035	0.568296	131	4	-0.61296	0.97493	0.97511	0.999997	1447	0	-0.61296
GAMT	6	0.85432	0.85456	0.999997	1219	0	-0.041812	0.97503	0.97523	0.999997	1448	0	-0.041812
SUPT16H	6	0.0068421	0.023076	0.409525	87	4	-0.68542	0.97516	0.97537	0.999997	1449	0	-0.68542
NOMO1	6	0.063566	0.14424	0.82791	233	3	-0.59319	0.97533	0.97559	0.999997	1450	0	-0.59319
SUGT1	6	0.02015	0.060089	0.606387	139	3	-0.61707	0.9756	0.9758	0.999997	1451	0	-0.61707
AASS	6	0.0015025	0.0063003	0.202661	48	4	-0.89605	0.97576	0.97599	0.999997	1452	0	-0.89605
YTHDF1	6	0.12396	0.23596	0.956225	345	2	-0.30303	0.97599	0.97626	0.999997	1453	0	-0.30303
ARHGAP5	6	0.43621	0.52342	0.999997	743	1	-0.33001	0.97606	0.97635	0.999997	1454	0	-0.33001
FASN	6	0.69284	0.69487	0.999997	974	1	-0.0097344	0.97657	0.97685	0.999997	1455	0	-0.0097344
PAPOLA	6	0.0038555	0.013623	0.328666	64	4	-0.89197	0.97692	0.97724	0.999997	1456	0	-0.89197
OR5AK2	6	0.15523	0.26917	0.98166	385	1	-0.39566	0.97776	0.97809	0.999997	1457	0	-0.39566
PSMC3	6	0.013218	0.042191	0.529503	116	4	-0.69075	0.97855	0.97893	0.999997	1458	0	-0.69075
NT5C3A	6	0.46592	0.53948	0.999997	765	1	-0.44161	0.97873	0.97911	0.999997	1459	0	-0.44161
GORASP2	6	0.53897	0.58292	0.999997	833	1	-0.28324	0.97928	0.97963	0.999997	1460	0	-0.28324
BLMH	6	0.095657	0.20222	0.928246	290	3	-0.42221	0.97931	0.97965	0.999997	1461	0	-0.42221
ALAS1	6	0.91812	0.91858	0.999997	1317	0	-0.12078	0.9798	0.98008	0.999997	1462	0	-0.12078
ILF2	6	0.0066996	0.022588	0.409337	85	4	-0.76398	0.98	0.98031	0.999997	1463	0	-0.76398
CAPZA1	6	0.26994	0.39522	0.999997	532	2	-0.39021	0.9803	0.98061	0.999997	1464	0	-0.39021
CSRP1	6	0.97111	0.97139	0.999997	1417	0	-0.038112	0.98085	0.98114	0.999997	1465	0	-0.038112
TMEM209	6	0.25614	0.37973	0.999997	509	2	-0.38574	0.98093	0.98126	0.999997	1466	0	-0.38574
AK3	6	0.079355	0.1731	0.883973	263	3	-0.60099	0.98109	0.98145	0.999997	1467	0	-0.60099
SEPTIN7	6	0.11705	0.22811	0.941719	335	2	-0.49011	0.98131	0.98168	0.999997	1468	0	-0.49011
RBM3	6	0.85001	0.85019	0.999997	1211	0	-0.22275	0.98146	0.98187	0.999997	1469	0	-0.22275
DMD	6	0.012752	0.040883	0.529503	113	4	-0.66126	0.98149	0.98189	0.999997	1470	0	-0.66126
EEF1A2	6	0.28977	0.41674	0.999997	572	2	-0.3339	0.98157	0.98199	0.999997	1471	0	-0.3339
SERPINB1	6	0.32351	0.45373	0.999997	624	1	-0.43107	0.98262	0.98297	0.999997	1472	0	-0.43107
MYBPC2	6	0.40132	0.50551	0.999997	712	1	-0.46304	0.98299	0.98327	0.999997	1473	0	-0.46304
UPF1	6	0.44879	0.5301	0.999997	754	1	-0.38258	0.98323	0.98354	0.999997	1474	0	-0.38258
DSTN	6	0.73164	0.73091	0.999997	1026	1	-0.20017	0.98357	0.98394	0.999997	1475	0	-0.20017
RPS6KA3	6	0.0047078	0.016214	0.349491	71	4	-0.90989	0.98508	0.98549	0.999997	1476	0	-0.90989
UGP2	6	1.3e-05	6.09e-05	0.008551	11	5	-1.5355	0.98523	0.98565	0.999997	1477	0	-1.5355
COPE	6	0.012999	0.041595	0.529503	114	4	-0.66172	0.98571	0.98608	0.999997	1478	0	-0.66172
ISOC1	6	0.72647	0.72583	0.999997	1016	1	-0.39367	0.98575	0.98613	0.999997	1479	0	-0.39367
POF1B	6	0.55261	0.59157	0.999997	844	1	-0.36034	0.98619	0.98656	0.999997	1480	0	-0.36034
CRAT	6	0.079607	0.17358	0.883973	265	2	-0.28393	0.98621	0.98657	0.999997	1481	0	-0.28393
UBE2D2	6	0.036928	0.093447	0.728698	176	3	-0.55373	0.98689	0.98717	0.999997	1482	0	-0.55373
HNRNPA1	6	0.0062836	0.021203	0.393505	82	3	-0.77255	0.98725	0.98751	0.999997	1483	0	-0.77255
CPNE1	6	0.75471	0.75402	0.999997	1065	0	-0.2307	0.98785	0.9882	0.999997	1484	0	-0.2307
HAT1	6	0.30525	0.43393	0.999997	594	2	-0.51346	0.9882	0.98854	0.999997	1485	0	-0.51346
DERA	6	0.41408	0.51242	0.999997	723	1	-0.30625	0.98916	0.98954	0.999997	1486	0	-0.30625
ME2	6	0.18108	0.29717	0.999997	420	2	-0.46014	0.98972	0.99008	0.999997	1487	0	-0.46014
ACAA2	6	0.11568	0.22658	0.938086	333	2	-0.56225	0.99021	0.99058	0.999997	1488	0	-0.56225
ACSL4	6	0.075136	0.16538	0.876508	254	3	-0.61742	0.99033	0.99074	0.999997	1489	0	-0.61742
CDC37	6	0.00026402	0.0011446	0.072925	23	4	-1.3115	0.99044	0.99078	0.999997	1490	0	-1.3115
HSP90B1	6	0.0127	0.040742	0.529503	112	3	-0.78808	0.99057	0.9909	0.999997	1491	0	-0.78808
JAGN1	6	0.00053844	0.0021899	0.109071	31	5	-1.0559	0.99065	0.99097	0.999997	1492	0	-1.0559
HMGCS1	6	0.0002546	0.0010933	0.072925	22	5	-0.97325	0.9921	0.99248	0.999997	1493	0	-0.97325
RPL19	6	0.085911	0.18474	0.905301	273	3	-0.60162	0.99238	0.99277	0.999997	1494	0	-0.60162
RAB1B	6	0.0046315	0.015964	0.349491	70	4	-0.79098	0.99265	0.99303	0.999997	1495	0	-0.79098
FUBP1	6	0.0021449	0.008378	0.239549	54	4	-0.9109	0.9927	0.99307	0.999997	1496	0	-0.9109
ATG3	6	0.012284	0.039306	0.529503	110	3	-0.72762	0.99383	0.9942	0.999997	1497	0	-0.72762
ISOC2	6	0.28948	0.41638	0.999997	571	2	-0.48415	0.99387	0.99428	0.999997	1498	0	-0.48415
PSMD5	6	0.0001392	0.00063164	0.051329	19	4	-1.1858	0.99396	0.99437	0.999997	1499	0	-1.1858
GDI2	6	0.0076421	0.025429	0.43374	89	4	-0.72536	0.99402	0.99441	0.999997	1500	0	-0.72536
SFXN1	6	0.034592	0.088939	0.717411	166	3	-0.65928	0.99403	0.99441	0.999997	1501	0	-0.65928
NCBP1	6	0.00013356	0.0006124	0.051329	18	5	-1.2593	0.99415	0.99451	0.999997	1502	0	-1.2593
UPP1	6	0.50621	0.56283	0.999997	799	1	-0.37557	0.99427	0.99466	0.999997	1503	0	-0.37557
COPZ1	6	0.00017088	0.00075348	0.058168	20	4	-1.2081	0.99441	0.9948	0.999997	1504	0	-1.2081
MRPL1	6	0.17319	0.28867	0.999997	406	2	-0.25702	0.99474	0.99503	0.999997	1505	0	-0.25702
COX2	6	0.016059	0.050541	0.562255	127	3	-0.67434	0.99499	0.99528	0.999997	1506	0	-0.67434
PGM1	6	0.042244	0.104	0.747433	186	2	-0.48709	0.99527	0.99549	0.999997	1507	0	-0.48709
SRSF11	6	0.25526	0.3788	0.999997	507	2	-0.39029	0.99575	0.99592	0.999997	1508	0	-0.39029
PKN2	6	0.21598	0.33539	0.999997	460	2	-0.42827	0.99581	0.996	0.999997	1509	0	-0.42827
YWHAG	6	0.2168	0.33628	0.999997	462	2	-0.4105	0.99587	0.99603	0.999997	1510	0	-0.4105
PDIA6	6	0.0017577	0.0072109	0.219821	49	4	-0.91231	0.99596	0.99614	0.999997	1511	0	-0.91231
ZNF326	6	0.01269	0.040704	0.529503	111	4	-0.65703	0.99731	0.99727	0.999997	1512	0	-0.65703
ALB	6	0.53936	0.58318	0.999997	834	1	-0.51105	0.9976	0.99753	0.999997	1513	0	-0.51105
SPTAN1	6	0.11544	0.22623	0.938086	332	2	-0.35286	0.9981	0.99809	0.999997	1514	0	-0.35286
NAPG	6	3.57e-05	0.00019558	0.02157	14	4	-1.9788	0.99821	0.99818	0.999997	1515	0	-1.9788
CYB5B	6	0.020601	0.060942	0.606721	140	2	-0.50506	0.9984	0.99839	0.999997	1516	0	-0.50506
MVK	6	6.75e-05	0.00031101	0.032013	15	5	-1.4858	0.99846	0.99846	0.999997	1517	0	-1.4858
DDX42	6	0.00043563	0.0017987	0.092574	30	4	-1.0992	0.99853	0.99854	0.999997	1518	0	-1.0992
SOAT1	6	0.10924	0.2195	0.937624	321	2	-0.50248	0.99854	0.99855	0.999997	1519	0	-0.50248
RAVER2	6	0.016089	0.050618	0.562255	128	4	-0.68679	0.99856	0.99857	0.999997	1520	0	-0.68679
PSMB2	6	0.062266	0.14171	0.822545	230	3	-0.59309	0.99859	0.99859	0.999997	1521	0	-0.59309
RAB10	6	0.010834	0.035054	0.510602	103	4	-0.65668	0.99871	0.99874	0.999997	1522	0	-0.65668
CTPS1	6	0.16619	0.28134	0.989639	402	2	-0.45538	0.99878	0.9988	0.999997	1523	0	-0.45538
KRT25	6	0.061446	0.14009	0.816234	229	3	-0.59262	0.99886	0.99886	0.999997	1524	0	-0.59262
HSPA4	6	0.020771	0.061301	0.606721	141	3	-0.68856	0.99904	0.99902	0.999997	1525	0	-0.68856
ELMOD2	6	0.015238	0.048097	0.550898	124	4	-0.62488	0.99907	0.99905	0.999997	1526	0	-0.62488
SMARCA5	6	0.0055464	0.018818	0.375321	77	4	-0.77985	0.99909	0.9991	0.999997	1527	0	-0.77985
CSNK2A1	6	0.056764	0.13151	0.799388	223	3	-0.5945	0.99914	0.99916	0.999997	1528	0	-0.5945
SRSF3	5	0.00035578	0.0016576	0.088255	28	4	-1.5194	0.99922	0.99921	0.999997	1529	0	-1.5194
GPD1	6	0.009776	0.031662	0.479276	100	4	-0.66595	0.99928	0.99927	0.999997	1530	0	-0.66595
PRPF4B	6	0.014962	0.047225	0.550898	123	4	-0.66047	0.99944	0.99943	0.999997	1531	0	-0.66047
AP1M1	6	0.012177	0.038857	0.529503	107	4	-0.71075	0.99947	0.99946	0.999997	1532	0	-0.71075
YWHAZ	6	0.0012634	0.0053	0.181848	45	5	-0.93185	0.9996	0.99958	0.999997	1533	0	-0.93185
TMCO1	6	0.0021276	0.0083459	0.239549	53	4	-0.86474	0.99968	0.99965	0.999997	1534	0	-0.86474
RPL22	6	0.0030201	0.010885	0.280116	60	4	-0.90593	0.99972	0.99968	0.999997	1535	0	-0.90593
RAB6A	6	8.01e-05	0.00036872	0.035582	16	5	-1.3952	0.99975	0.99975	0.999997	1536	0	-1.3952
EDF1	6	0.0011152	0.0046395	0.162804	44	5	-0.87079	0.99989	0.99993	0.999997	1537	0	-0.87079
RAB2A	6	2.08e-06	1.6e-05	0.00495	5	6	-1.7467	0.99999	1	0.999997	1538	0	-1.7467
SUMO2	6	1.13e-05	5.45e-05	0.008416	10	6	-0.98192	0.99999	1	0.999997	1539	0	-0.98192
P4HB	6	9.28e-06	5.45e-05	0.008416	8	6	-1.007	0.99999	1	0.999997	1540	0	-1.007
SLC30A1	6	6.04e-06	4.17e-05	0.008045	7	6	-1.1813	0.99999	1	0.999997	1541	0	-1.1813
SAR1A	6	3.52e-07	3.21e-06	0.001238	2	6	-2.0172	1	1	0.999997	1542	0	-2.0172
HELZ	6	1.24e-06	3.21e-06	0.001238	4	6	-1.5991	1	1	0.999997	1543	0	-1.5991
TMED10	6	1.28e-09	3.21e-06	0.001238	1	6	-1.7185	1	1	0.999997	1544	0	-1.7185
